# Supplementary material for: What can we learn from top-cited articles in inflammatory bowel disease? A bibliometric analysis and assessment of the level of evidence
Source: PubMed Central journal article supplement — BMJ Open. 2018 Jul 12;8(7):e021233. doi: 10.1136/bmjopen-2017-021233 (PMC6082456; doi:10.1136/bmjopen-2017-021233), 2018-07-12
Supplement: bmjopen-2017-021233.draft_revisions.pdf [file bmjopen-2017-021233.draft_revisions.pdf]

# BMJ Open

BMJ Open is committed to open peer review. As part of this commitment we make the peer review history of every article we publish publicly available.

When an article is published we post the peer reviewers' comments and the authors' responses online. We also post the versions of the paper that were used during peer review. These are the versions that the peer review comments apply to.

The versions of the paper that follow are the versions that were submitted during the peer review process. They are not the versions of record or the final published versions. They should not be cited or distributed as the published version of this manuscript.

BMJ Open is an open access journal and the full, final, typeset and author-corrected version of record of the manuscript is available on our site with no access controls, subscription charges or pay-per-view fees (<http://bmjopen.bmj.com>).

If you have any questions on BMJ Open's open peer review process please email [info.bmjopen@bmj.com](mailto:info.bmjopen@bmj.com)

# BMJ Open

## What can we learn from top-cited articles in inflammatory bowel disease? A bibliometric analysis and assessment of the level of evidence

|                               |                                                                                                                                                 |
|-------------------------------|-------------------------------------------------------------------------------------------------------------------------------------------------|
| Journal:                      | <i>BMJ Open</i>                                                                                                                                 |
| Manuscript ID                 | bmjopen-2017-021233                                                                                                                             |
| Article Type:                 | Research                                                                                                                                        |
| Date Submitted by the Author: | 29-Dec-2017                                                                                                                                     |
| Complete List of Authors:     | Azer, Samy; King Saud University, Medical Education; Australian Professional Teaching,<br>Azer, Sarah; St Vincent Hospital                      |
| Keywords:                     | Inflammatory bowel disease (IBD), Ulcerative colitis (UC), Crohn's disease (CD), Bibliometric analysis, Top-cited articles, Quality of evidence |
|                               |                                                                                                                                                 |

SCHOLARONE™  
Manuscripts

Peer Review Only

1  
2  
3  
4  
5  
6  
7  
8  
9  
10  
11  
12  
13  
14  
15  
16  
17  
18  
19  
20  
21  
22  
23  
24  
25  
26  
27  
28  
29  
30  
31  
32  
33  
34  
35  
36  
37  
38  
39  
40  
41  
42  
43  
44  
45  
46  
47  
48  
49  
50  
51  
52  
53  
54  
55  
56  
57  
58  
59  
60

## **What can we learn from top-cited articles in inflammatory bowel disease? A bibliometric analysis and assessment of the level of evidence**

FOR PEER REVIEW ONLY

Samy A. Azer<sup>1</sup> and Sarah Azer<sup>2</sup>

Dr Azer is consultant gastroenterologist and a professor of medical education and the chair of Curriculum Development and Research Unit, College of Medicine, King Saud University, Riyadh, Saudi Arabia<sup>1</sup>

Registrar, St Vincent Hospital, University of Melbourne, Victoria, Australia<sup>2</sup>

Correspondence and requests for reprints should be addressed to Dr Azer:  
Curriculum Development and Research Unit,  
College of Medicine, King Saud University  
P O Box 2925, Riyadh 11461  
Saudi Arabia  
Telephone: (966) 11-4699178  
Fax: (966) 11-4699174

Email: [azer2000@optusnet.com.au](mailto:azer2000@optusnet.com.au)

SHORT TITLE: Top-cited Inflammatory Bowel Disease

## ABSTRACT

**Objectives:** Our objectives were to identifying the top-cited articles in inflammatory bowel disease (IBD), assessing their characteristics, and identifying the quality of evidence provided by these articles.

**Design and outcome measures:** The most frequently cited articles in IBD were searched in November 2016 in the Science Citation Index Expanded database. Eligible articles were reviewed for these characteristics- number of years since publication, journal impact factor (JIF), the number of authors, number of females in authorship, number of institutes, countries involved and grants received. The level of evidence was determined using the Oxford Centre for Evidence-Based Medicine guidelines.

**Results:** The number of citations varied 804 to 3320, total= 65332, median= 1042.50, (IQR= 596). No correlations were found between the number of citations and number of years since publication ( $p=0.532$ ), JIF ( $p=0.179$ ), number of authors ( $p=0.770$ ), females in authorship ( $p=0.368$ ), number of institutes ( $p=0.890$ ), number of countries ( $p=0.959$ ), or number of grants ( $p=0.464$ ). Countries contributed to the majority of articles were United States, United Kingdom, Germany, France and Canada. The levels of evidence were 10 articles at level 1b, 11 articles at level 3a, and 17 articles at level 3b. The overall agreement between evaluators using Fleiss kappa was 0.8252; 95% CI=0.79-0.85.

**Conclusions:** research papers represented 68% (basic research 15, 30% and clinical research 19, 38%). Although no article had a level of evidence at 1a, the majority of articles were at reasonable high level of evidence. The study also shows gender gap and the fact that women still compose a minority of authorship in this area.

## Key words

Inflammatory bowel disease (IBD), Ulcerative colitis (UC), Crohn's disease (CD), Top-cited articles, Bibliometric analysis, Quality of evidence, Number of authors, Female authors, Grants/funds, Institutes, Countries.

## Strengths and limitations of the study

- More than one method was used in searching the Science Citation Index Expanded to maximize the yield of the search.
- The articles represent a historic perspective on key discoveries in the area of inflammatory bowel disease.
- A number of characteristics including number of authors, number of females in authorship, number of institutes, number of countries involved, and grants received have been studied against citations received.
- The level of evidence for each article has been evaluated.
- The search was limited to articles in the English language, raising the possibility of failing to include top-cited articles in other languages.

## INTRODUCTION

The number of citations received by an article has been used for several years by universities and grant funding bodies in assessing the quality of research produced by researchers, ranking research performance and in making decisions regarding professional promotion and grant applications [1-4]. Thomson Reuters gather the names of these authors in the Highly Cited Researchers database where they are acknowledged for the quality of their work and the size of their research input in a particular area [5]. However, the number of citations cannot explain why researchers cited a paper nor reflect the quality of the research and the outcomes identified in a manuscript. Recently, three machine learning models were applied to predict the top 10% of articles in terms of number of citations to the article, suggesting that the topic rather than the content may be the reason for the high citations [6]. While one may agree that there is a high correlation between the numbers of papers a researcher has published and the total number of citations received [7] it appears that both indices namely the number of citations and the number of publications are reflective of research performance measurement and both have been represented in the *H-index* [8]. This index has been currently used in quantifying an individual's scientific research output in a much more meaningful way than depending on the number of citations alone.

Another criticism against the number of citations is self-citations, citations because researchers do not agree with the results/the explanations given or they have reached to different conclusions [9]. While this may form an argument, it cannot explain the high citation numbers received, particularly when we talk about top-cited articles. Evidence has shown that the number of self-citation because of disagreement is usually not significant in highly cited

1  
2  
3 articles [10]. Also it has been shown that journals with lower impact factor tend to have a  
4  
5 higher self-citation rate [11].  
6  
7

8  
9 Therefore, the number of citations and the reputation of contribution to research in a particular  
10  
11 field cannot be ignored particularly when there is a pattern of consistency and progressive  
12  
13 input into a discipline over years (a life experience), and a demonstration from publication  
14  
15 records and citation history of collaboration with other researchers from other institutes at  
16  
17 local and international levels. Hence the credits given to an author or a group of authors and  
18  
19 the impact of the work in a particular area can be proportionally related to the citation records  
20  
21 [12]. The greater the citation history over years, the more influential they are in their specialty  
22  
23 [13].  
24  
25

26  
27  
28 Inflammatory bowel disease comprises ulcerative colitis (UC) and Crohn's disease (CD); both  
29  
30 pursue a relapsing and remitting course over years. While the two diseases share several  
31  
32 similarities, they have a number of differences in regard to structures involved, pathogenesis,  
33  
34 clinical presentation, and management approaches. UC was first reported briefly in mid 1800  
35  
36 [14], while CD was reported in *the Journal of the American Medical Association (JAMA)* later  
37  
38 by Crohn, Ginzburg and Oppenheimer in 1932 [15]; describing it as a chronic inflammatory  
39  
40 bowel disease of the ilium. Later we learnt that CD can involve any part of the gastrointestinal  
41  
42 tract from the lips to the anal margin but the ileocolonic disease represents the common  
43  
44 presentation. Since then both diseases have been extensively researched in their different  
45  
46 aspects and one would be interested to explore top-cited articles that reflect the topics, aspects,  
47  
48 authors, and institutes that were behind our current knowledge and practices of these two  
49  
50  
51  
52  
53 diseases.  
54  
55  
56  
57  
58  
59  
60

1  
2  
3 However, there are no research publications covering top-cited articles in IBD. The  
4  
5 identification and analysis of the top-cited articles in inflammatory bowel disease bring a  
6  
7 number of educational and research-related issues that we need to consider:  
8  
9

10  
11 First, these articles can be considered a cornerstone in the field; advanced our knowledge  
12  
13 about IBD, and enabled us to make definitive progress in understanding its epidemiology,  
14  
15 pathogenesis, diagnostic procedures, and management.  
16  
17

18  
19 Second, these articles reflect the work of key authors and research teams from particular  
20  
21 institutes and countries that have made significant contribution to inflammatory bowel disease  
22  
23 over the last 50-60 years or at least their work was the nucleus of hundreds of other research  
24  
25 projects.  
26  
27

28  
29 Third, the analysis of the indicators/parameters related to these articles such as number of  
30  
31 authors, number of female authors, number of institutes, number of countries involved, and  
32  
33 number of funds/grants received could help in understanding which of these parameters may  
34  
35 correlate with higher number of citations and explain key features related to a successful or  
36  
37 influential paper.  
38  
39

40  
41 Therefore, the aims of the present research were: First, identify the top-cited articles in IBD.  
42  
43 Second, analyze their characteristics and evaluate any correlations between the number of  
44  
45 citations and the number of years since publications, the number of authors, the number of  
46  
47 females in authorship, the number of institutes, the number of countries involved and the  
48  
49 number of funds/grants received. Because of the assumption that researchers tend to cite  
50  
51 recently published articles, it was decided to compare the yearly mean citations received by  
52  
53 articles published before the year 2000 compared with the yearly means of those published  
54  
55  
56  
57  
58  
59  
60



1  
2  
3 after the year 2000. Third, assess the quality of evidence provided by articles. The findings  
4 from this study could enable clinicians, pathologists, other allied health professionals, post-  
5 graduate students, and researchers to explore key articles behind the progress in this topic over  
6 the last few decades and identify areas that need further research. As well as explore the  
7 characteristics of these articles and what can be learnt from such analysis.  
8  
9  
10  
11  
12  
13  
14  
15  
16  
17

## 18 **METHODS**

### 19 **Study Design**

20 The database, the Science Citation Index Expanded (SCI-Expanded) database of the Thomson  
21 Reuters Web of Science was searched for the identification of the top-cited articles and  
22 tracking the citation records of each publication. Although Scopus and Google Scholar also  
23 provide citation records, it was decided to limit the search to SCI-Expanded database.  
24 Compared to other databases, SCI-Expanded database is regularly updated and the 2015  
25 Journal Citation Reports (JCRs) included more than 6,500 journals across 150 disciplines.  
26 Although Google Scholar database is freely available, it was not used because it is difficult to  
27 search, and it cites textbooks, monographs, conference proceedings, as well as non-peer  
28 reviewed publications [16]. It is also not possible to track the yearly records of citations  
29 attracted by each article since publication. Scopus database was not used because it is not  
30 extensive in its coverage and its records only go back to 1996 [17].  
31  
32  
33  
34  
35  
36  
37  
38  
39  
40  
41  
42  
43  
44  
45  
46  
47

48 To achieve the first two aims of this study we planned to identify the highly cited articles in  
49 IBD and assess if there were any correlation between the number of citations and any of the  
50 parameters characterizing these highly cited articles- number of authors, percentage of female  
51 authors, number of institutes, number of countries involved, and number of grants/funds  
52  
53  
54  
55  
56  
57  
58  
59  
60

1  
2  
3 received. Regarding the third aim we planned to grade each article against the level of  
4  
5 evidence hierarchy as per the Oxford Centre for Evidence-Based Medicine (OCEBM-2011  
6  
7 Levels of Evidence and the accompanying Table of Evidence Glossary) [18, 19].  
8  
9

### 10 11 12 13 **Searching the Science Citation Index Expanded Database**

14  
15 On 5<sup>th</sup> to 9<sup>th</sup> of November 2016, two researchers (the author who is a professor of medical  
16  
17 education, consultant gastroenterologist, and a fellow of the American College of  
18  
19 Gastroenterology together with a research assistant who has medical background) searched the  
20  
21 SCI-Expanded database to retrieve top-cited articles in inflammatory bowel disease. The  
22  
23 search words used were the following: “Inflammatory bowel disease”, “Ulcerative colitis”,  
24  
25 “Crohn’s disease”, “IBD”, “Experimental colitis”, “Animal models for Colitis”, “Animal  
26  
27 models for inflammatory bowel disease”, “Pathology IBD”, “Pathology UC”, “Pathology CD”,  
28  
29 “Pathogenesis IBD”, “Pathogenesis UC”, “Pathogenesis CD”, “Treatment IBD”, “Treatment  
30  
31 UC”, “Treatment CD”, “Investigation IBD” and “Regional ileitis”. To increase the yield of the  
32  
33 search, we used the full terms- inflammatory bowel disease, ulcerative colitis, and Crohn’s  
34  
35 disease for the abbreviations IBD, UC, and CD, respectively. These search words were  
36  
37 identified from the terminology used in gastroenterology journals and the proceedings of  
38  
39 major conferences on inflammatory bowel disease and gastroenterology such as the British  
40  
41 Society of Gastroenterology (BSG), the American Gastroenterological Association (AGA),  
42  
43 American College of Gastroenterology (ACG), Canadian Association of Gastroenterology  
44  
45 (CAG), Scottish Society of Gastroenterology (SSG), and Gastroenterological Society of  
46  
47 Australia (GESA). For each search word, the results were arranged using a link on the Science  
48  
49 Citation Index Expanded database system “sort-by” – “Time Cited- highest to lowest”. The  
50  
51  
52  
53  
54  
55  
56  
57  
58  
59  
60

1  
2  
3 results showed the articles organized in a descending order with the articles most frequently  
4 cited on the top. A copy of the results was printed out for further analysis. The findings from  
5 each search word were then arranged on one Excel sheet (Microsoft Excel 2010, Microsoft  
6 Corp, Redmond, WA) in a descending order based on the number of citations. Duplicate  
7 articles and articles not in the English language were excluded. Articles with identical  
8 absolute number of citations were identified and were ranked on the basis of average citation  
9 per year. The average number of citations per year is the ratio calculated from the number of  
10 citations obtained by an article divided by the number of years since published [20]. A copy of  
11 all papers included in the list was obtained and read by the two evaluators.  
12  
13  
14  
15  
16  
17  
18  
19  
20  
21  
22  
23

24 Using the above mentioned search words, we conducted another search of major  
25 gastroenterology journals and the 2015-JCR under the category “Gastroenterology and  
26 Hepatology”. This category comprises 76 journals at the time of conducting the search; of  
27 these seven journals were in languages other than English and were not searched.  
28 Gastroenterology journals publishing articles not in the English language were excluded  
29 because neither the author nor the assistant researchers are competent in the Spanish, Italian or  
30 German languages. Since the language recommended by the journal publishing this work is  
31 English and its readers are most likely interested in research publications in the English  
32 language, we decided not to search these journals.  
33  
34  
35  
36  
37  
38  
39  
40  
41  
42  
43  
44  
45

46 Interestingly, after identifying the list of top-cited articles in IBD, and again checking these  
47 seven non-English journals, none had a paper with a citation higher than the paper ranked  
48 number 50 in the list.  
49  
50  
51

52 Also these key words were used in searching the websites of major general medicine, surgery  
53 and research journals including the *New England Journal of Medicine*, *Lancet*, *the British*  
54  
55  
56  
57  
58  
59  
60

1  
2  
3 *Medical Journal, the Journal of the American Medical Association, Annals of Internal*  
4 *Medicine, Archives of Medicine, PLOS Medicine, Annals of Surgery, Archives of Surgery,*  
5 *British Journal of Surgery, American Journal of Surgical Pathology, Nature, Science, Nature*  
6 *Reviews Cancer, Nature Genetics, Nature Medicine, Cell, Nature Reviews Microbiology,*  
7 *Immunity, Nature Reviews Immunology, Nature Reviews Molecular Cell Biology, and Journal*  
8 *of Immunology.*  
9

10  
11  
12 A list identifying the 50 top-cited articles was reviewed again and checked regarding  
13 authorship, year of publication, title of the article, journal publishing the work, the Journal  
14 Impact Factor (JIF) at the time of the search, the number of citations and the institution of the  
15 first author (Appendix 1). Two articles shared the same citation number and the average  
16 citation per year was used to justify their ranking order. The average citation per year is  
17 calculated using this equation= total number of citations obtained/number of years calculated  
18 from the year of publication to the time of the research.  
19  
20  
21  
22  
23  
24  
25  
26  
27  
28  
29  
30  
31  
32

33  
34  
35  
36  
37 =====Add Appendix 1 =====  
38  
39  
40  
41

## 42 **Inclusion And Exclusion Criteria**

43  
44 The inclusion criteria were: (i) papers focusing on inflammatory bowel disease (ulcerative  
45 colitis or Crohn's disease) in the English language, and (ii) articles, reviews, research papers,  
46 reports, meta-analysis on any aspect related to inflammatory bowel disease in the English  
47 language (aetiology, contributing factors, incidence, population studies, pathology,  
48 pathogenesis, investigations, treatment/management, medications, nutrition, health promotion,  
49 patient education, animal studies, clinical studies, *in vitro* or *in vivo* studies or any related  
50  
51  
52  
53  
54  
55  
56  
57  
58  
59  
60

1  
2  
3 clinical, healthcare, research issues). The exclusion criteria were: (i) articles on inflammatory  
4 bowel disease in languages other than English, (ii) articles that focused on other diseases and  
5 inflammatory bowel disease was not the main focus, and (iii) studies that focus on other types  
6 of colitis and not inflammatory bowel disease.  
7  
8  
9  
10  
11

### 12 **Assessing Articles**

13  
14  
15 The full text of the identified 50-top cited articles was obtained and a copy was given to each  
16 researcher. The following information was collected for each article: (i) the authors' names,  
17 the number of authors, their affiliations, and the number of females contributing to authorship,  
18 (ii) the number of institutes involved in the publication, (iii) the city and country of the origin  
19 of the publication, (iv) the total number of citations obtained up to the day of searching the  
20 database, and the number of yearly citations since publication, (v) the year of publication and  
21 the calculated number of years since published, and (vi) the number of funds/grants stated in  
22 the publication and the Web of Science.  
23  
24  
25  
26  
27  
28  
29  
30  
31  
32  
33

34 We have not used the classification provided by the Web of Science regarding study type  
35 because we noted that the Web of Science allocates publications that are original research,  
36 articles, practical guides and reviews and identified them as articles or reviews. For  
37 consistency and the purpose of this study, the system we used groups the top-cited articles into  
38 four types - article, review paper/meta-analysis, report, and research. A definition of each type  
39 is given in the glossary. Two researchers independently allocated each of the top-cited articles  
40 under its type as per the definition given. Any differences between the researchers were  
41 discussed in a meeting until a decision was reached.  
42  
43  
44  
45  
46  
47  
48  
49  
50  
51  
52  
53  
54  
55  
56  
57  
58  
59  
60

1  
2  
3 The topics covered by the top-cited articles were identified by each researcher independently  
4 and were discussed in a meeting to harmonize the grouping into a logical, simple and practical  
5 way. Articles that covered more than one topic were classified on the basis of the aim of the  
6 study and the main outcomes. For other evaluations of an article including the number of  
7 authors, the number of females represented in authorship, the number of institutes, and  
8 countries contributing to the work, and the number of grants/funds received we checked the  
9 original article for such details. Regarding the identification of females in the authorship we  
10 noted that several journals use abbreviations of the first and second name rather than the full  
11 name. In order to identify the females in these articles we tried to search the Google database  
12 to find the university, personal website of the author, their LinkedIn or ResearchGate  
13 accounts. We also tried to identify them by searching the Google Scholar database and  
14 identify their account, where we can find other publications under their name and the full first  
15 name.

### 34 **Evaluating the Journals**

35  
36 The publishing journals of the top 50 articles in IBD were identified and evaluated in regard to  
37 the following: (i) the 2015-Journal Impact Factor (JIF) of each journal, and (ii) the ranking  
38 order of each article in comparison to other articles published in that journal. This was based  
39 on the number of citations obtained in comparison to the citation numbers received by other  
40 articles published in the journal. For example, an article ranked number one, in its publishing  
41 journal, means that the article received the highest number of citations in comparison to all  
42 other articles published in that journal. This evaluation aimed at assessing the position order of  
43 articles identified among the 50 top-cited articles in IBD in regard to their ranking among  
44 other articles published in the journal. Such assessment highlights the significance of the  
45  
46  
47  
48  
49  
50  
51  
52  
53  
54  
55  
56  
57  
58  
59  
60

1  
2  
3 inflammatory bowel disease articles among other topics published in gastroenterological  
4 journals as well as general medicine journals such as *The New England Journal of Medicine*,  
5 *The Lancet*, *the British Medical Journal*, *Medicine*, and top research journals such as *Nature*,  
6 *Nature Genetics*, *Science*, *Cell*, and top journals in immunology such as *Nature Reviews*  
7 *Immunology*, and *Immunity* (Appendix 1).  
8  
9  
10  
11  
12  
13  
14  
15  
16  
17

### 18 **Assessing Level of Evidence**

19 Two researchers independently used the Oxford Centre for Evidence-Based Medicine  
20 (OCEBM-2011 Levels of Evidence and the accompanying Table of Evidence Glossary)  
21 [18,19] to rank each article regarding level of evidence. In 1998 this hierarchical of evidence  
22 was first produced to make the process of finding relevant evidence feasible. Since then the  
23 levels have been reviewed and amended, and the version used in this research is the currently  
24 available version. [18,19]. This evaluation aimed at identifying the level of evidence of each  
25 article and assessing whether the highly cited articles have received higher scores in regard to  
26 level of evidence as per the Oxford hierarchy.  
27  
28  
29  
30  
31  
32  
33  
34  
35  
36  
37  
38  
39  
40

### 41 **Statistical Analysis**

42 Pearson's correlation coefficient ( $r$ ) was calculated to determine if the high citation numbers  
43 obtained was related to the age of the article. Other correlations were between the number of  
44 citations and the number of authors, the percentage of females in authorship, the number of  
45 institutes, the number of countries involved, the number of grants received, and the Journal  
46 Impact Factor (JIF) of the journals in which articles were published. Because of the  
47 assumption that researchers usually cite recently published articles, it was decided to compare  
48  
49  
50  
51  
52  
53  
54  
55  
56  
57  
58  
59  
60

1  
2  
3 the mean yearly citations received of articles published before the year 2000 and compare  
4 them with those published after the year 2000. All analyses were conducted using SPSS  
5 Software (IBM SPSS Statistics Premium version 22.0 for Mac OS-SPSS Inc., Chicago, IL,  
6 USA) and the results were reported at total, mean, median, IQR, and percentage. The inter-  
7 rater agreement between evaluators was calculated using the Fleiss kappa scale [21].  
8  
9  
10  
11  
12  
13  
14  
15  
16

## 17 **RESULTS**

### 18 **Top-Cited Papers Identified**

19  
20 Appendix 1 summarizes the top-cited articles in IBD identified by searching the Science  
21 Citation Index Expanded database [22-71]. The articles are listed in a descending order from 1  
22 to 50 with the highest absolute citation number is ranked 1 and the article with the lowest  
23 citation ranked 50 as per the day of the search. Articles with the same number of citations  
24 were ranked on the basis of average citation per year (the articles ranked 46 and 47 had the  
25 same citation number 814, they were allocated to a ranking order based on the calculated  
26 citation per year, 50.9 and 30.1, respectively).  
27  
28  
29  
30  
31  
32  
33  
34  
35  
36  
37  
38  
39  
40  
41  
42

43 Table 1 summarizes the year of publication and article type. The articles were published over  
44 57 years (from 1955 to 2012). During the period from 1955 to 1976, only 3 articles (6%)  
45 were published. However, the number increased significantly from 1977 to 1994 making a  
46 total of 13 (26%) articles. The number of publications increased significantly to 34 (68%)  
47 during the years from 1995 to 2012. No correlation was found between the number of citations  
48 of these papers and the number of years since published (Pearson correlation ( $r$ ) = 0.090,  $p$  =  
49  
50  
51  
52  
53  
54  
55  
56  
57  
58  
59  
60



1  
2  
3 0.532). To assess if there were differences between old articles (published before the year  
4 2000) and those published after the year 2000, it was decided to study the mean number of  
5 citations received by top-cited articles in each year after their publications. The year 2000 was  
6 taken as a midpoint for comparison because the majority of articles identified were published  
7 in the period after the year 1986, and hence the year 2000 could represent such point. As  
8 shown from Figures 1A and 1B, the mean numbers of citations were higher for articles  
9 published after the year 2000 compared to those published before the year 2000.

10  
11  
12  
13  
14  
15  
16  
17  
18  
19 Approximately one fourth of the top-cited papers were reviews/meta-analysis (n= 13, 26%),  
20 two-thirds were research papers (n= 34, 68%), and the remaining were articles (n= 2, 4%) and  
21 a report (n=1, 2%).  
22  
23  
24  
25  
26  
27  
28  
29

30 =====Please Add Table 1 here=====

31  
32  
33  
34  
35  
36 Table 2 summarizes the distribution of IBD topics covered in the top-cited articles. These can  
37 be summarized as follows: Epidemiology and prevalence (n=2, 4%), Crohn's disease genetic  
38 susceptibility and NOD2 mutation (n=7, 14%), Animal models (n= 6, 12%), Pathogenesis of  
39 IBD (n= 13, 26%), classification and index of disease activity (n= 5, 10%), risk of developing  
40 colorectal cancer (n= 2, 4%), extra-intestinal complications (n= 1, 2%), Infliximab in Crohn's  
41 disease (n= 6, 12%), corticosteroids in ulcerative colitis (n=1, 2%), drug treatment and  
42 cyclosporine in ulcerative colitis (n= 2, 4%), adalimumab in Crohn's disease (n=1, 2%), 5-  
43 aminosalicylic acid in ulcerative colitis (n=1, 2%), 6-mercaptopurine in Crohn's disease (n=1,  
44 2%), and monoclonal antibiotics, and anti-tumour necrosis factor in Crohn's disease (n=2,  
45  
46  
47  
48  
49  
50  
51  
52  
53  
54  
55  
56  
57  
58  
59  
60

1  
2  
3 4%). As shown in Appendix 1, 15 (30%) were basic research and 19 (38%) were clinical  
4  
5 research. The level of evidence is discussed later in the results.  
6  
7  
8  
9  
10

11  
12 =====Please Add Table 2 here =====  
13  
14  
15  
16  
17

18 The articles were published in the following journals: *New England Journal of Medicine* (n=  
19 12, 24%), *Gastroenterology* (n= 10, 20%), *Nature* (n=4, 8%), *Nature Genetics* (n=4, 8%), *The*  
20 *Lancet* (n= 3, 6%), *Proceedings of the National Academic of Sciences of the United States of*  
21 *America* (n=2, 4%), *Cell* (n= 2, 4%), and *Gut* (n= 2, 4%). See Table 3 for more details about  
22 the journals publishing these articles.  
23  
24  
25  
26  
27  
28  
29  
30  
31  
32

33  
34 =====Please Add Table 3 here =====  
35  
36  
37  
38  
39  
40  
41  
42  
43  
44  
45  
46  
47  
48  
49  
50  
51  
52  
53  
54  
55  
56  
57  
58  
59  
60

Looking at the ranking of the top-cited articles in IBD in the journals they were published in  
could provide a better picture about the influence of these articles. This influence would be  
clearly demonstrated when the journal has a relatively higher Journal Impact Factor. The  
ranking is based on the number of citations received by an article compared to the number of  
citations received by other articles that were published in that journal. The article by Best et al  
(1976) [25] is ranked number 4 in the list, and also ranked number 2 among all articles  
published in *Gastroenterology* (2015-JIF = 18.187). The article by Eaden et al [42] is ranked  
number 21 in the list and also ranked number 1 among all articles published in *Gut* (2015-JIF=

1  
2  
3 14.921). The ranking of other articles in List and their rankings in the journals in which they  
4  
5 were published are shown in Appendix 1.  
6  
7

8  
9 The first author of the top-cited articles was from the United States (n= 25, 50%), The United  
10  
11 Kingdom (n=6, 12%), Germany (n= 6, 12%), France (n= 4, 8%), Canada (n= 3, 6%), Belgium  
12  
13 (n= 2, 4%), Japan (n=2, 4%), Sweden (n=1, 2%), and the Netherlands (n=1, 2%).  
14  
15

16  
17 Table 4 summarises the 72 authors who have published two papers or more in the top-cited  
18  
19 IBD. Of these 19 authors were the first author and coauthors of more than two papers in total,  
20  
21 one was only the first author of two papers, all the remaining, 52 were coauthors of more than  
22  
23 two papers. Top authors were Rutgeers, P (n=10 papers), Targan, SR (n=8 papers), Schreiber,  
24  
25 S (n=8 papers), Cho, JH (n=7 papers), Colombel, JF (n=7 papers), Hanauer, SB (n=7 papers),  
26  
27 Duerr, RH (n=6 papers), Silverberg, MS (n=6 papers), and each of the following authors have  
28  
29 5 papers: Podolsky, DK, Rioux, JD, Daly MJ, Steinhart, AH, Rotter, JI, Schumm, LP, van  
30  
31 Deventer, SJ, Taylor, KD, Vermeire, S, Mathew, CG, and Regueiro, M.  
32  
33  
34  
35  
36  
37  
38  
39

40  
41  
42  
43  
44  
45  
46  
47  
48  
49  
50  
51  
52  
53  
54  
55  
56  
57  
58  
59  
60  
=====Please Add Table 4 here =====

61  
62  
63  
64  
65  
66  
67  
68  
69  
70  
71  
72  
73  
74  
75  
76  
77  
78  
79  
80  
81  
82  
83  
84  
85  
86  
87  
88  
89  
90  
91  
92  
93  
94  
95  
96  
97  
98  
99  
100  
101  
102  
103  
104  
105  
106  
107  
108  
109  
110  
111  
112  
113  
114  
115  
116  
117  
118  
119  
120  
121  
122  
123  
124  
125  
126  
127  
128  
129  
130  
131  
132  
133  
134  
135  
136  
137  
138  
139  
140  
141  
142  
143  
144  
145  
146  
147  
148  
149  
150  
151  
152  
153  
154  
155  
156  
157  
158  
159  
160  
161  
162  
163  
164  
165  
166  
167  
168  
169  
170  
171  
172  
173  
174  
175  
176  
177  
178  
179  
180  
181  
182  
183  
184  
185  
186  
187  
188  
189  
190  
191  
192  
193  
194  
195  
196  
197  
198  
199  
200  
201  
202  
203  
204  
205  
206  
207  
208  
209  
210  
211  
212  
213  
214  
215  
216  
217  
218  
219  
220  
221  
222  
223  
224  
225  
226  
227  
228  
229  
230  
231  
232  
233  
234  
235  
236  
237  
238  
239  
240  
241  
242  
243  
244  
245  
246  
247  
248  
249  
250  
251  
252  
253  
254  
255  
256  
257  
258  
259  
260  
261  
262  
263  
264  
265  
266  
267  
268  
269  
270  
271  
272  
273  
274  
275  
276  
277  
278  
279  
280  
281  
282  
283  
284  
285  
286  
287  
288  
289  
290  
291  
292  
293  
294  
295  
296  
297  
298  
299  
300  
301  
302  
303  
304  
305  
306  
307  
308  
309  
310  
311  
312  
313  
314  
315  
316  
317  
318  
319  
320  
321  
322  
323  
324  
325  
326  
327  
328  
329  
330  
331  
332  
333  
334  
335  
336  
337  
338  
339  
340  
341  
342  
343  
344  
345  
346  
347  
348  
349  
350  
351  
352  
353  
354  
355  
356  
357  
358  
359  
360  
361  
362  
363  
364  
365  
366  
367  
368  
369  
370  
371  
372  
373  
374  
375  
376  
377  
378  
379  
380  
381  
382  
383  
384  
385  
386  
387  
388  
389  
390  
391  
392  
393  
394  
395  
396  
397  
398  
399  
400  
401  
402  
403  
404  
405  
406  
407  
408  
409  
410  
411  
412  
413  
414  
415  
416  
417  
418  
419  
420  
421  
422  
423  
424  
425  
426  
427  
428  
429  
430  
431  
432  
433  
434  
435  
436  
437  
438  
439  
440  
441  
442  
443  
444  
445  
446  
447  
448  
449  
450  
451  
452  
453  
454  
455  
456  
457  
458  
459  
460  
461  
462  
463  
464  
465  
466  
467  
468  
469  
470  
471  
472  
473  
474  
475  
476  
477  
478  
479  
480  
481  
482  
483  
484  
485  
486  
487  
488  
489  
490  
491  
492  
493  
494  
495  
496  
497  
498  
499  
500  
501  
502  
503  
504  
505  
506  
507  
508  
509  
510  
511  
512  
513  
514  
515  
516  
517  
518  
519  
520  
521  
522  
523  
524  
525  
526  
527  
528  
529  
530  
531  
532  
533  
534  
535  
536  
537  
538  
539  
540  
541  
542  
543  
544  
545  
546  
547  
548  
549  
550  
551  
552  
553  
554  
555  
556  
557  
558  
559  
560  
561  
562  
563  
564  
565  
566  
567  
568  
569  
570  
571  
572  
573  
574  
575  
576  
577  
578  
579  
580  
581  
582  
583  
584  
585  
586  
587  
588  
589  
590  
591  
592  
593  
594  
595  
596  
597  
598  
599  
600  
601  
602  
603  
604  
605  
606  
607  
608  
609  
610  
611  
612  
613  
614  
615  
616  
617  
618  
619  
620  
621  
622  
623  
624  
625  
626  
627  
628  
629  
630  
631  
632  
633  
634  
635  
636  
637  
638  
639  
640  
641  
642  
643  
644  
645  
646  
647  
648  
649  
650  
651  
652  
653  
654  
655  
656  
657  
658  
659  
660  
661  
662  
663  
664  
665  
666  
667  
668  
669  
670  
671  
672  
673  
674  
675  
676  
677  
678  
679  
680  
681  
682  
683  
684  
685  
686  
687  
688  
689  
690  
691  
692  
693  
694  
695  
696  
697  
698  
699  
700  
701  
702  
703  
704  
705  
706  
707  
708  
709  
710  
711  
712  
713  
714  
715  
716  
717  
718  
719  
720  
721  
722  
723  
724  
725  
726  
727  
728  
729  
730  
731  
732  
733  
734  
735  
736  
737  
738  
739  
740  
741  
742  
743  
744  
745  
746  
747  
748  
749  
750  
751  
752  
753  
754  
755  
756  
757  
758  
759  
760  
761  
762  
763  
764  
765  
766  
767  
768  
769  
770  
771  
772  
773  
774  
775  
776  
777  
778  
779  
780  
781  
782  
783  
784  
785  
786  
787  
788  
789  
790  
791  
792  
793  
794  
795  
796  
797  
798  
799  
800  
801  
802  
803  
804  
805  
806  
807  
808  
809  
810  
811  
812  
813  
814  
815  
816  
817  
818  
819  
820  
821  
822  
823  
824  
825  
826  
827  
828  
829  
830  
831  
832  
833  
834  
835  
836  
837  
838  
839  
840  
841  
842  
843  
844  
845  
846  
847  
848  
849  
850  
851  
852  
853  
854  
855  
856  
857  
858  
859  
860  
861  
862  
863  
864  
865  
866  
867  
868  
869  
870  
871  
872  
873  
874  
875  
876  
877  
878  
879  
880  
881  
882  
883  
884  
885  
886  
887  
888  
889  
890  
891  
892  
893  
894  
895  
896  
897  
898  
899  
900  
901  
902  
903  
904  
905  
906  
907  
908  
909  
910  
911  
912  
913  
914  
915  
916  
917  
918  
919  
920  
921  
922  
923  
924  
925  
926  
927  
928  
929  
930  
931  
932  
933  
934  
935  
936  
937  
938  
939  
940  
941  
942  
943  
944  
945  
946  
947  
948  
949  
950  
951  
952  
953  
954  
955  
956  
957  
958  
959  
960  
961  
962  
963  
964  
965  
966  
967  
968  
969  
970  
971  
972  
973  
974  
975  
976  
977  
978  
979  
980  
981  
982  
983  
984  
985  
986  
987  
988  
989  
990  
991  
992  
993  
994  
995  
996  
997  
998  
999  
1000

1  
2  
3 Illinois, the United States, University of Pittsburgh, Pittsburgh, Pennsylvania, the United  
4  
5 States, University Hospital of Cleveland Case Western Reserve University School of  
6  
7 Medicine, Ohio, the United States, Wellcome Trust Centre for Human Genetics, University of  
8  
9 Oxford, Roosevelt Drive, Oxford, the United Kingdom, Wellcome Trust Sanger Institute,  
10  
11 Wellcome Trust Genome Campus, Cambridge, the United Kingdom, and Institute of Virology  
12  
13 and Immunobiology, University of Würzburg, Germany. See Appendix 1 for more detail.  
14  
15  
16

### 17 18 **Characteristics of the Top-Cited Articles**

19  
20 These articles were created by 673 authors, median 7.0, minimum 1, maximum 106, IQR 12;  
21  
22 the females in authorship were 115, median 1.0, minimum 0, maximum 20, IQR 2. It is worth  
23  
24 mentioning here that it was difficult to identify the gender of authors in two papers because  
25  
26 the full first and middle names were not shown and it was difficult to find more information or  
27  
28 clues to make a decision. The number of institutes involved were 431, median 3.0, minimum  
29  
30 1, maximum 88, IQR 9; the countries involved were 139, median 1.0, minimum 1, maximum  
31  
32 16, IQR 2; and the number of grants/funds were 334, median 1.0, minimum 0, maximum 94,  
33  
34 IQR 3. No correlations were found between the number of citations and the Journal Impact  
35  
36 Factor (JIF) (Pearson correlation ( $r$ ) = 0.193;  $p$ =0.179), the number of authors ( $r$  = -0.042;  $p$ =  
37  
38 0.770), number of females in authorship ( $r$  = -0.125;  $p$ = 0.368), the number of institutes  
39  
40 involved ( $r$  = -0.020;  $p$ = 0.890), the number of countries involved ( $r$  = 0.007;  $p$ = 0.959), and the  
41  
42 number of grants received ( $r$  = -0.106;  $p$ =0.464).  
43  
44  
45  
46  
47  
48

### 49 **Level of Evidence**

50  
51 Table 5 summarizes the grading of articles according to the Oxford Center for evidence-based  
52  
53 medicine. The table shows that most articles were graded at levels 1b and 3a and 3b evidence  
54  
55 (10 papers had level 1b evidence, 11 papers at level 3a, and 17 papers had level 3b evidence).  
56  
57  
58  
59  
60

1  
2  
3 Only 5 papers had a level of evidence of 4 and one paper at level 5. No papers were at level  
4  
5 1a. The remaining 3 papers were at level 2b and two papers at level 2c. The overall agreement  
6  
7 between the evaluators was acceptable; Fleiss kappa= 0.8252; 95% CI 0.79-0.85.  
8  
9

10  
11  
12  
13  
14 =====Please Add Table 5 here =====  
15

## 16 17 18 19 20 **DISCUSSION**

21  
22  
23 This study aimed at identifying the characteristics of the top 50 most frequently cited papers in  
24  
25 IBD and assessing the quality of evidence provided. The papers covered a number of key  
26  
27 topics related to IBD including: epidemiology and prevalence, pathogenesis and genetic  
28  
29 susceptibility of NOD2 mutation, animal models, clinical classification and indices of disease  
30  
31 activity, risks of developing colorectal cancer, extra-intestinal complications, and use of  
32  
33 infliximab, adalimumab, monoclonal antibodies and anti-tumour necrosis factor, and 6-  
34  
35 mercaptopurine in CD, and use of 5-aminosalicylic acid, corticosteroids, and cyclosporine in  
36  
37 treating UC. While these topics cover key issues related to IBD, topics related to molecular  
38  
39 biology, surgical management, patient education, nutritional aspects, radiological and other  
40  
41 investigations were not represented in the top-cited articles list [72-73].  
42  
43  
44  
45  
46

47  
48 The assessment of the characteristics of the top 50 highly cited articles identified in this study  
49  
50 reveals the following:  
51

52  
53 First, the lack of correlations between the number of citations and the number of years since  
54  
55 publication may indicate that the high citation numbers are not caused by ageing of these  
56  
57  
58  
59  
60

1  
2  
3 articles. In fact, only 16 articles (32%) were published in the period from 1955 to 1994 (39  
4 years), while the majority 34 (68%) were published in the last 17 years. This paper also shows  
5 that the mean number of citations of articles published before the year 2000 were much lower  
6 than those of articles after the year 2000. This may be related to the tendency of researchers to  
7 cite recently published research and new findings [74] and papers that they have read [20, 75].  
8 Also the higher citations have been found to be the strongest predictor of current online  
9 availability after long time since publication. Therefore, the higher citation could be a  
10 protective mechanism for continued availability of a publication despite aging and hence  
11 continuing citation [76].  
12  
13  
14  
15  
16  
17  
18  
19  
20  
21  
22  
23

24 Second, the lack of a correlation between the number of citations and the Journal Impact  
25 Factor (JIF). The JIF has been widely used in ranking and evaluating journals. It stands as a  
26 proxy for the relative importance of a journal with its field [77]. Although the top-cited  
27 articles identified were published in journals with high impact factors, the impact factors of  
28 some journals were not necessarily the highest in their fields. For example, *Human Pathology*,  
29 *Laboratory Investigation*, *Canadian Journal of Gastroenterology and Hepatology*, *Medicine*  
30 *(Baltimore)*, *Journal of Immunology*, *Infection and Immunity*, and *Scandinavian Journal of*  
31 *Gastroenterology* had JIFs in the range of 2.1 to 4.9. With this information in mind one may  
32 postulate that the high JIF is not necessarily related to the higher citation numbers received.  
33  
34  
35  
36  
37  
38  
39  
40  
41  
42  
43  
44  
45  
46  
47  
48  
49  
50  
51  
52  
53  
54  
55  
56  
57  
58  
59  
60

Third, the study showed negative correlation between the number of citations and the number  
of authors, the number of female authors, or the number of institutes. The number of authors

1  
2  
3 and females in authorship varied from one to 106 and from zero to 20, respectively. Also the  
4  
5 number of institutes involved varied from one to 88. The question that can be raised in this  
6  
7 regards; are we expecting an increase in number of citations as the number of authors or the  
8  
9 number institutes involved increased? The work of Garcia-Aroca et al [80] shows that  
10  
11 collaboration between authors increases their impact and increases citation rates. However,  
12  
13 they showed that publishing in English in certain journals and collaborating with certain  
14  
15 authors and institutes increase the visibility of the manuscripts published on the subject.  
16  
17 Hence it is the quality of collaboration rather than the absolute number of these parameters.  
18  
19 Recently Tanner-Smith and Polanin showed that studies conducted by more established  
20  
21 authors (have higher h-indices) and reported in more prestigious journal outlets are more  
22  
23 likely to be cited by other scholars, even after controlling for various proxies of study quality  
24  
25 [81].  
26  
27  
28  
29  
30

31  
32 Although the proportion of women in authorship of original research in the United States in  
33  
34 general has significantly increased in the last four decades, women still compose a minority of  
35  
36 the authors of original research [82]. In the field of gastroenterology, the percentage of the  
37  
38 United States female physician authors of original research in the field has relatively increased  
39  
40 over time, yet the senior author position remains lower than expected [83,84].  
41  
42  
43

44  
45 Fourth, the study showed no correlation between the number of citations and the number of  
46  
47 funds/grants received. This finding is not surprising. Recently it was shown that too many of  
48  
49 the United States authors of most influential papers in science do not receive NH funding [85].  
50  
51 Another group of researchers found no association between grant percentile ranking and grant  
52  
53 outcome as assessed by number of top-10% articles per dollar million spent [86].  
54  
55  
56  
57  
58  
59  
60

1  
2  
3 The United States, the United Kingdom, Germany, France, and Canada contributed to the  
4 majority of these articles. The leadership of universities from these countries in  
5  
6 gastrointestinal research particularly IBD is no surprise, top universities identified from this  
7  
8 study were Massachusetts General Hospital and Harvard Medical School, Boston,  
9  
10 Massachusetts, the United States, Mount Sinai School of Medicine, New York, the United  
11  
12 States, Mayo Clinic, Rochester, Minnesota, the United States, Cedars-Sinai Medical Center,  
13  
14 Los Angeles, California, the United States, University of Chicago Medical Center, Chicago,  
15  
16 Illinois, the United States, University of Pittsburgh, Pittsburgh, Pennsylvania, the United  
17  
18 States, University Hospital of Cleveland Case Western Reserve University School of  
19  
20 Medicine, Ohio, the United States, Wellcome Trust Centre for Human Genetics, University of  
21  
22 Oxford, Roosevelt Drive, Oxford, the United Kingdom, Wellcome Trust Sanger Institute,  
23  
24 Wellcome Trust Genome Campus, Cambridge, the United Kingdom, Institute of Virology and  
25  
26 Immunobiology, University of Würzburg, Germany, Institute of Clinical Molecular Biology,  
27  
28 Christian-Albrechts-University Kiel, Kiel, Germany, Hôpital Claude Huriez and Centre  
29  
30 d'Investigation Clinique, Centre Hospitalier Universitaire de Lill, Université Lille Nord de  
31  
32 France, Lille, France, Foundation Jean Dausset CEPH, France, University of Toronto,  
33  
34 Toronto, Ontario, Canada, and University of Montreal, Research Center, Montreal, Quebec,  
35  
36 Canada  
37  
38  
39  
40  
41  
42  
43  
44

45 All articles were published in the English language. The most productive journals were the  
46  
47 *New England Journal of Medicine*, and *Gastroenterology* with a total of 22 articles. Others  
48  
49 were *Nature*, *Nature Genetics*, *the Lancet*, and *Proceedings of the National Academy of*  
50  
51 *Sciences of the United States of America*, *Cell*, *Gut*, *British Medical Journal*, *Science*, *Nature*  
52  
53 *Reviews Immunology*, and *Immunity*, making a total of 21 articles. While these journals have a  
54  
55  
56  
57  
58  
59  
60



1  
2  
3 relatively high JIF, other journals published one article each and had a relatively low JIF  
4 compared to journals included in their categories. For example, *Human Pathology* listed  
5 number 22 under the category of Pathology, *Canadian Journal of Gastroenterology and*  
6 *Hepatology*, listed number 74 under the category Gastroenterology and Hepatology,  
7 *Scandinavian Journal of Gastroenterology*, listed number 77 under the category  
8 Gastroenterology and Hepatology, and *Infection and Immunity* listed number 67 under the  
9 category Immunology. The high level of evidence as outlined in the top-cited articles could be  
10 an important contributing factor to the higher number of citations received by these articles  
11 [87].  
12  
13  
14  
15  
16  
17  
18  
19  
20  
21  
22  
23  
24  
25  
26  
27

## 28 CONCLUSIONS

29  
30  
31 The top 50 top-cited articles in inflammatory bowel disease were identified by searching the  
32 Science Citation Index Expanded database; the citation analysis revealed that these articles  
33 were published between 1955 and 2012 with the years from 1995 to 2012 representing the  
34 best productive period. The citations varied from 804 to 3320 and the yearly mean numbers of  
35 citations for papers published after the year 2000 were relatively higher compared to those  
36 published before the year 2000. Over two thirds of these papers were research (30% basic  
37 research and 38% clinical research), and the remaining were mainly reviews and meta-  
38 analysis. Only three were articles and reports. The top-cited articles focused on: epidemiology  
39 and prevalence of IBD, pathogenesis and genetic susceptibility of NOD2 mutation, animal  
40 models, clinical classification and indices of disease activity, risks of developing colorectal  
41 cancer, extra-intestinal complications, and use of infliximab, adalimumab, monoclonal  
42  
43  
44  
45  
46  
47  
48  
49  
50  
51  
52  
53  
54  
55  
56  
57  
58  
59  
60

1  
2  
3 antibodies and anti-tumour necrosis factor, and 6- mercaptopurine in CD, and use of 5-  
4 aminosalicylic acid, corticosteroids, and cyclosporine in treating UC. The journals that  
5 published top-cited articles were not limited to gastroenterology journals; top general  
6 medicine journals such as the *New England Journal of Medicine*, *the Lancet*, *British Medical*  
7 *Journal*, and *Medicine (Baltimore)*, as well as top research journals such as *Nature*, *Nature*  
8 *Genetics*, *Science* and *Nature Reviews Immunology* contributed to the publication of these  
9 papers. On assessing the evidence level, ten articles were at level 1b, eleven articles were at  
10 level 3a, and seventeen articles were at level 3b. Countries that contributed to the majority of  
11 articles were the United States, the United Kingdom, Germany, France and Canada. There was  
12 no significant correlation between the number of citations and the number of years since  
13 publication, the Journal Impact Factor (JIF), the number of authors, the number of female  
14 authors, the number of institutes, the number of countries involved, or the number of grants  
15 received. These findings may be consistent with the concept that it is not the absolute number  
16 of collaboration that will make an impact on the citation number or the influence of a  
17 publication but rather the quality of such collaboration in regard to the researchers involved,  
18 their institutes, and the ongoing contribution to the advances of a particular area in research.  
19 The relatively small number of females in the authorship reflects the gender gap and the fact  
20 that women still compose a minority of the authors of original research and reviews in  
21 gastroenterology. The higher level of evidence demonstrated in most top-cited articles may  
22 have contributed to the higher number of citations received by these articles.  
23  
24  
25  
26  
27  
28  
29  
30  
31  
32  
33  
34  
35  
36  
37  
38  
39  
40  
41  
42  
43  
44  
45  
46  
47  
48  
49  
50  
51  
52  
53  
54  
55  
56  
57  
58  
59  
60

1  
2  
3 **Acknowledgement:** The author would like to thank Diana Sanad for her assistance and  
4 reviewing the manuscript. Also thank Dr Lily Scott for her assistance in this work.  
5  
6  
7  
8  
9

10 **Funding support:** This work was funded by the College of Medicine, Research Center  
11 Deanship of Scientific Research, King Saud University, Riyadh, Saudi Arabia.  
12  
13  
14

15 **Ethical approval:** Not applicable to this study.  
16  
17

18 **Contributors** SAA and SA shared equally the different roles and responsibilities to complete  
19 the submitted article including, the research idea, the search of databases, the evaluation of  
20 data collected, the statistical analysis, the interpretation of findings, the creation of tables and  
21 figures, writing the manuscript and the approved the final version of the manuscript.  
22  
23  
24  
25

26 **Competing interests:** Both authors (SAA and SA) declare that they have no competing  
27 interests and have completed the International Committee of Medical Journal Editors (ICMJE)  
28 form  
29  
30  
31

32 **Provenance and peer review:** Not commissioned; externally peer reviewed  
33  
34  
35

36 **Data sharing statement:** No further data available to share  
37  
38  
39  
40  
41  
42  
43  
44  
45  
46  
47  
48  
49  
50  
51  
52

## REFERENCES

1. MacMaster FP, Swansburg R, Rittenbach K. Academic Productivity in Psychiatry: Benchmarks for the H-Index. *Acad Psychiatry*. 2017 Apr 18. [Epub ahead of print]
2. Susarla HK, Dhar V, Karimbux NY, Tinanoff N. Do Standard Bibliometric Measures Correlate with Academic Rank of Full-Time Pediatric Dentistry Faculty Members? *J Dent Educ*. 2017 Apr;81(4):427-432.
3. Milone MT, Bernstein J. On Track to Professorship? A Bibliometric Analysis of Early Scholarly Output. *Am J Orthop (Belle Mead NJ)*. 2016 Mar-Apr;45(3):E119-23.
4. Azer SA, Holen A, Wilson I, Skokauskas N. Impact factor of medical education journals and recently developed indices: Can any of them support academic promotion criteria? *J Postgrad Med*. 2016 Jan-Mar;62(1):32-39. doi: 10.4103/0022-3859.173202.
5. Jones AW. Impact of JAT publications 1981-2003: the most prolific authors and the most highly cited articles. *J Anal Toxicol*. 2004 Oct;28(7):541-545.
6. Rosenkrantz AB, Doshi AM, Ginocchio LA, Aphinyanaphongs Y. Use of a Machine-learning Method for Predicting Highly Cited Articles Within General Radiology Journals. *Acad Radiol*. 2016 Dec;23(12):1573-1581. doi: 10.1016/j.acra.2016.08.011. Epub 2016 Sep 28.
7. Bosquet C, Combes PP. Are academics who publish more also more cited? Individual determinants of publication and citation records *Scientometrics* 97 (3), 831-857
8. Hirsch JE. An index to quantify an individual's scientific research output. *Proc Natl Acad Sci U S A*. 2005 Nov 15;102(46):16569-72.

- 1  
2  
3  
4 9. Miyamoto S. Self-citation rate and impact factor in the field of plastic and reconstructive  
5 surgery. *J Plast Surg Hand Surg*. 2017 May 9;1-7. doi: 10.1080/2000656X.2017.1319847.  
6 [Epub ahead of print]  
7  
8  
9  
10  
11 10. Ioannidis JP, Klavans R, Boyack KW. Multiple Citation Indicators and Their Composite  
12 across Scientific Disciplines. *PLoS Biol*. 2016 Jul 1;14(7):e1002501. doi:  
13 10.1371/journal.pbio.1002501. eCollection 2016 Jul.  
14  
15  
16  
17 11. Reiter O, Mimouni M, Mimouni D. Analysis of self-citation and impact factor in  
18 dermatology journals. *Int J Dermatol*. 2016 Sep;55(9):995-9. doi: 10.1111/ijd.13193. Epub  
19 2015 Dec 23.  
20  
21  
22 12. Patsopoulos NA, Ioannidis JP, Analatos AA. Origin and funding of the most frequently  
23 cited papers in medicine: database analysis. *BMJ* 2006;332:1061–4.  
24  
25  
26 13. Garfield E. Fortnightly review: how can impact factors be improved? *BMJ* 1996;313:411–  
27 413.  
28  
29  
30 14. Wilks S. Morbid appearances in the in- testines of Miss Bankes. *Med Times Gazette*  
31 1859;2:264-265.  
32  
33 15. Crohn BB, Ginzburg L, Oppenheimer GD. Regional ileitis: a pathologic and clinical  
34 entity. *JAMA* 1932;99:1323-1329.  
35  
36  
37 16. Van Noorden R, Maher B, Nuzzo R. The top 100 papers. *Nature*. 2014;514(7524):550.  
38  
39 17. Kulkarni AV, Aziz B, Shams I, Busse JW. Comparisons of citations in Web of Science,  
40 Scopus, and Google Scholar for articles published in general medical journals. *JAMA*. 2009  
41 Sep 9;302(10):1092-1096.  
42  
43  
44 18. Azer SA. Top-Cited Articles in Problem-Based Learning: A Bibliometric Analysis and  
45 Quality of Evidence Assessment. *J Dent Educ*. 2017 Apr;81(4):458-478.  
46  
47  
48 19. Oxford Centre for Evidence-based Medicine – Levels of Evidence (March 2009).  
49 Available at: [http://www.cebm.net/oxford-centre-evidence-based-medicine-levels-evidence-](http://www.cebm.net/oxford-centre-evidence-based-medicine-levels-evidence-march-2009)  
50 [march-2009](http://www.cebm.net/oxford-centre-evidence-based-medicine-levels-evidence-march-2009) [Accessed 20 May 2017].  
51  
52  
53 20. Azer SA. The top-cited articles in medical education: a bibliometric analysis. *Acad Med*  
54 2015;90(8):1147-1161.  
55  
56  
57  
58  
59  
60

- 1  
2  
3  
4 21. D'Antiga L, Betalli P, De Angelis P, et al. Interobserver agreement on endoscopic  
5 classification of oesophageal varices in children. *J Pediatr Gastroenterol Nutr* 2015;61(2):176-  
6 181.  
7  
8  
9 22. Hugot JP, Chamaillard M, Zouali H, Lesage S, Cézard JP, Belaiche J, Almer S, Tysk C,  
10 O'Morain CA, Gassull M, Binder V, Finkel Y, Cortot A, Modigliani R, Laurent-Puig P,  
11 Gower-Rousseau C, Macry J, Colombel JF, Sahbatou M, Thomas G. Association of NOD2  
12 leucine-rich repeat variants with susceptibility to Crohn's disease. *Nature*. 2001 May  
13 31;411(6837):599-603.  
14  
15  
16 23. Ogura Y, Bonen DK, Inohara N, Nicolae DL, Chen FF, Ramos R, Britton H, Moran T,  
17 Karaliuskas R, Duerr RH, Achkar JP, Brant SR, Bayless TM, Kirschner BS, Hanauer SB,  
18 Nuñez G, Cho JH. A frameshift mutation in NOD2 associated with susceptibility to Crohn's  
19 disease. *Nature*. 2001 May 31;411(6837):603-6.  
20  
21  
22 24. Kühn R, Löhler J, Rennick D, Rajewsky K, Müller W. Interleukin-10-deficient mice  
23 develop chronic enterocolitis. *Cell*. 1993 Oct 22;75(2):263-74  
24  
25 25. Best WR, Beckett JM, Singleton JW, Kern F Jr. Development of a Crohn's disease activity  
26 index. National Cooperative Crohn's Disease Study. *Gastroenterology*. 1976 Mar;70(3):439-  
27 44.  
28  
29  
30 26. Podolsky DK. Inflammatory bowel disease. *N Engl J Med*. 2002 Aug 8;347(6):417-429.  
31  
32 27. Targan SR, Hanauer SB, van Deventer SJ, Mayer L, Present DH, Braakman T, DeWoody  
33 KL, Schaible TF, Rutgeerts PJ. A short-term study of chimeric monoclonal antibody cA2 to  
34 tumor necrosis factor alpha for Crohn's disease. Crohn's Disease cA2 Study Group. *N Engl J*  
35 *Med*. 1997 Oct 9;337(15):1029-35.  
36  
37  
38  
39 28. Hanauer SB, Feagan BG, Lichtenstein GR, Mayer LF, Schreiber S, Colombel JF,  
40 Rachmilewitz D, Wolf DC, Olson A, Bao W, Rutgeerts P; ACCENT I Study Group.  
41 Maintenance infliximab for Crohn's disease: the ACCENT I randomised trial. *Lancet*. 2002  
42 May 4;359(9317):1541-1549.  
43  
44  
45  
46 29. Truelove SC and Witts LJ. Cortisone in ulcerative colitis; final report on a therapeutic  
47 trial. *Br Med J*. 1955 Oct 29;2(4947):1041-1048.  
48  
49  
50 30. Xavier RJ, Podolsky DK. Unravelling the pathogenesis of inflammatory bowel disease.  
51 *Nature*. 2007 Jul 26;448(7152):427-434.  
52  
53 31. Duerr RH, Taylor KD, Brant SR, Rioux JD, Silverberg MS, Daly MJ, Steinhart AH,  
54 Abraham C, Regueiro M, Griffiths A, Dassopoulos T, Bitton A, Yang H, Targan S, Datta LW,  
55 Kistner EO, Schumm LP, Lee AT, Gregersen PK, Barmada MM, Rotter JI, Nicolae DL, Cho  
56 JH. A genome-wide association study identifies IL23R as an inflammatory bowel disease  
57  
58  
59  
60

1  
2  
3 gene. *Science*. 2006 Dec 1;314(5804):1461-1463.  
4

5  
6 32. Present DH, Rutgeerts P, Targan S, Hanauer SB, Mayer L, van Hogezaand RA, Podolsky  
7 DK, Sands BE, Braakman T, DeWoody KL, Schaible TF, van Deventer SJ. Infliximab for the  
8 treatment of fistulas in patients with Crohn's disease. *N Engl J Med*. 1999 May  
9 6;340(18):1398-405.  
10

11 33. Rutgeerts P, Sandborn WJ, Feagan BG, Reinisch W, Olson A, Johanns J, Travers S,  
12 Rachmilewitz D, Hanauer SB, Lichtenstein GR, de Villiers WJ, Present D, Sands BE,  
13 Colombel JF. Infliximab for induction and maintenance therapy for ulcerative colitis. *N Engl J*  
14 *Med*. 2005 Dec 8;353(23):2462-76.  
15

16  
17  
18 34. Fiocchi C. Inflammatory bowel disease: etiology and pathogenesis. *Gastroenterology*.  
19 1998 Jul;115(1):182-205.  
20

21  
22  
23 35. Barrett JC, Hansoul S, Nicolae DL, Cho JH, Duerr RH, Rioux JD, Brant SR, Silverberg  
24 MS, Taylor KD, Barmada MM, Bitton A, Dassopoulos T, Datta LW, Green T, Griffiths AM,  
25 Kistner EO, Murtha MT, Regueiro MD, Rotter JI, Schumm LP, Steinhart AH, Targan SR,  
26 Xavier RJ; NIDDK IBD Genetics Consortium, Libioulle C, Sandor C, Lathrop M, Belaiche J,  
27 Dewit O, Gut I, Heath S, Laukens D, Mni M, Rutgeerts P, Van Gossum A, Zelenika D,  
28 Franchimont D, Hugot JP, de Vos M, Vermeire S, Louis E; Belgian-French IBD Consortium;  
29 Wellcome Trust Case Control Consortium, Cardon LR, Anderson CA, Drummond H, Nimmo  
30 E, Ahmad T, Prescott NJ, Onnie CM, Fisher SA, Marchini J, Ghorri J, Bumpstead S, Gwilliam  
31 R, Tremelling M, Deloukas P, Mansfield J, Jewell D, Satsangi J, Mathew CG, Parkes M,  
32 Georges M, Daly MJ. Genome-wide association defines more than 30 distinct susceptibility  
33 loci for Crohn's disease. *Nat Genet*. 2008 Aug;40(8):955-962.  
34  
35

36  
37  
38 36. Riddell RH, Goldman H, Ransohoff DF, Appelman HD, Fenoglio CM, Haggitt RC, Ahren  
39 C, Correa P, Hamilton SR, Morson BC, et al. Dysplasia in inflammatory bowel disease:  
40 standardized classification with provisional clinical applications. *Hum Pathol*. 1983  
41 Nov;14(11):931-968.  
42

43 37. Sadlack B, Merz H, Schorle H, Schimpl A, Feller AC, Horak I. Ulcerative colitis-like  
44 disease in mice with a disrupted interleukin-2 gene. *Cell*. 1993 Oct 22;75(2):253-261.  
45  
46

47  
48 38. Loftus EV Jr. Clinical epidemiology of inflammatory bowel disease: Incidence,  
49 prevalence, and environmental influences. *Gastroenterology*. 2004 May;126(6):1504-1517.  
50

51 39. Okayasu I, Hatakeyama S, Yamada M, Ohkusa T, Inagaki Y, Nakaya R A novel method  
52 in the induction of reliable experimental acute and chronic ulcerative colitis in mice.  
53 *Gastroenterology*. 1990 Mar;98(3):694-702.  
54  
55



- 1  
2  
3 40. Harvey RF, Bradshaw JM. A simple index of Crohn's-disease activity. *Lancet*. 1980 Mar  
4 8;1(8167):514.  
5  
6  
7  
8 41. Frank DN, St Amand AL, Feldman RA, Boedeker EC, Harpaz N, Pace NR. Molecular-  
9 phylogenetic characterization of microbial community imbalances in human inflammatory  
10 bowel diseases. *Proc Natl Acad Sci U S A*. 2007 Aug 21;104(34):13780-13785  
11  
12  
13 42. Eaden JA, Abrams KR, Mayberry JF. The risk of colorectal cancer in ulcerative colitis: a  
14 meta-analysis. *Gut*. 2001 Apr;48(4):526-535.  
15  
16  
17  
18 43. Baert F, Noman M, Vermeire S, Van Assche G, D' Haens G, Carbonez A, Rutgeerts P.  
19 Influence of immunogenicity on the long-term efficacy of infliximab in Crohn's disease. *N*  
20 *Engl J Med*. 2003 Feb 13;348(7):601-608.  
21  
22  
23  
24 44. Cooper HS, Murthy SN, Shah RS, Sedergran DJ. Clinicopathologic study of dextran  
25 sulfate sodium experimental murine colitis. *Lab Invest*. 1993 Aug;69(2):238-249.  
26  
27  
28  
29 45. Ekblom A, Helmick C, Zack M, Adami HO. Ulcerative colitis and colorectal cancer. A  
30 population-based study. *N Engl J Med*. 1990 Nov 1;323(18):1228-1233.  
31  
32  
33 46. Silverberg MS, Satsangi J, Ahmad T, Arnott ID, Bernstein CN, Brant SR, Caprilli R,  
34 Colombel JF, Gasche C, Geboes K, Jewell DP, Karban A, Loftus EV Jr, Peña AS, Riddell  
35 RH, Sachar DB, Schreiber S, Steinhart AH, Targan SR, Vermeire S, Warren BF. Toward an  
36 integrated clinical, molecular and serological classification of inflammatory bowel disease:  
37 report of a Working Party of the 2005 Montreal World Congress of Gastroenterology. *Can J*  
38 *Gastroenterol*. 2005 Sep;19 Suppl A:5A-36A  
39  
40  
41  
42 47. Rioux JD, Xavier RJ, Taylor KD, Silverberg MS, Goyette P, Huett A, Green T, Kuballa P,  
43 Barmada MM, Datta LW, Shugart YY, Griffiths AM, Targan SR, Ippoliti AF, Bernard EJ,  
44 Mei L, Nicolae DL, Regueiro M, Schumm LP, Steinhart AH, Rotter JI, Duerr RH, Cho JH,  
45 Daly MJ, Brant SR. Genome-wide association study identifies new susceptibility loci for  
46 Crohn disease and implicates autophagy in disease pathogenesis. *Nat Genet*. 2007  
47 May;39(5):596-604.  
48  
49  
50  
51 48. Bouma G, Strober W. The immunological and genetic basis of inflammatory bowel  
52 disease. *Nat Rev Immunol*. 2003 Jul;3(7):521-533.  
53  
54  
55 49. Lichtiger S, Present DH, Kornbluth A, Gelernt I, Bauer J, Galler G, Michelassi F, Hanauer  
56 S. Cyclosporine in severe ulcerative colitis refractory to steroid therapy. *N Engl J Med*. 1994  
57  
58  
59  
60



1  
2  
3 Jun 30;330(26):1841-1845.  
4  
5

6  
7 50. Summers RW, Switz DM, Sessions JT Jr, Bechtel JM, Best WR, Kern F Jr, Singleton JW.  
8 National Cooperative Crohn's Disease Study: results of drug treatment. *Gastroenterology*.  
9 1979 Oct;77(4 Pt 2):847-869  
10

11 51. Franke A, McGovern DP, Barrett JC, Wang K, Radford-Smith GL, Ahmad T, Lees CW,  
12 Balschun T, Lee J, Roberts R, Anderson CA, Bis JC, Bumpstead S, Ellinghaus D, Festen EM,  
13 Georges M, Green T, Haritunians T, Jostins L, Latiano A, Mathew CG, Montgomery GW,  
14 Prescott NJ, Raychaudhuri S, Rotter JI, Schumm P, Sharma Y, Simms LA, Taylor KD,  
15 Whiteman D, Wijmenga C, Baldassano RN, Barclay M, Bayless TM, Brand S, Büning C,  
16 Cohen A, Colombel JF, Cottone M, Stronati L, Denson T, De Vos M, D'Inca R, Dubinsky M,  
17 Edwards C, Florin T, Franchimont D, Geary R, Glas J, Van Gossum A, Guthery SL,  
18 Halfvarson J, Verspaget HW, Hugot JP, Karban A, Laukens D, Lawrance I, Lemann M,  
19 Levine A, Libioulle C, Louis E, Mowat C, Newman W, Panés J, Phillips A, Proctor DD,  
20 Regueiro M, Russell R, Rutgeerts P, Sanderson J, Sans M, Seibold F, Steinhardt AH, Stokkers  
21 PC, Torkvist L, Kullak-Ublick G, Wilson D, Walters T, Targan SR, Brant SR, Rioux JD,  
22 D'Amato M, Weersma RK, Kugathasan S, Griffiths AM, Mansfield JC, Vermeire S, Duerr  
23 RH, Silverberg MS, Satsangi J, Schreiber S, Cho JH, Annese V, Hakonarson H, Daly MJ,  
24 Parkes M. Genome-wide meta-analysis increases to 71 the number of confirmed Crohn's  
25 disease susceptibility loci. *Nat Genet*. 2010 Dec;42(12):1118-1125.  
26  
27  
28  
29  
30

31 52. Sands BE, Anderson FH, Bernstein CN, Chey WY, Feagan BG, Fedorak RN, Kamm MA,  
32 Korzenik JR, Lashner BA, Onken JE, Rachmilewitz D, Rutgeerts P, Wild G, Wolf DC,  
33 Marsters PA, Travers SB, Blank MA, van Deventer SJ. Infliximab maintenance therapy for  
34 fistulizing Crohn's disease. *N Engl J Med*. 2004 Feb 26;350(9):876-85.  
35  
36

37  
38 53. Jostins L, Ripke S, Weersma RK, Duerr RH, McGovern DP, Hui KY, Lee JC, Schumm  
39 LP, Sharma Y, Anderson CA, Essers J, Mitrovic M, Ning K, Cleynen I, Theatre E, Spain SL,  
40 Raychaudhuri S, Goyette P, Wei Z, Abraham C, Achkar JP, Ahmad T, Amininejad L,  
41 Ananthakrishnan AN, Andersen V, Andrews JM, Baidoo L, Balschun T, Bampton PA, Bitton  
42 A, Boucher G, Brand S, Büning C, Cohain A, Cichon S, D'Amato M, De Jong D, Devaney  
43 KL, Dubinsky M, Edwards C, Ellinghaus D, Ferguson LR, Franchimont D, Fransen K, Geary  
44 R, Georges M, Gieger C, Glas J, Haritunians T, Hart A, Hawkey C, Hedl M, Hu X, Karlsen  
45 TH, Kupcinkas L, Kugathasan S, Latiano A, Laukens D, Lawrance IC, Lees CW, Louis E,  
46 Mahy G, Mansfield J, Morgan AR, Mowat C, Newman W, Palmieri O, Ponsioen CY,  
47 Potocnik U, Prescott NJ, Regueiro M, Rotter JI, Russell RK, Sanderson JD, Sans M, Satsangi  
48 J, Schreiber S, Simms LA, Sventoraityte J, Targan SR, Taylor KD, Tremelling M, Verspaget  
49 HW, De Vos M, Wijmenga C, Wilson DC, Winkelmann J, Xavier RJ, Zeissig S, Zhang B,  
50 Zhang CK, Zhao H; International IBD Genetics Consortium (IIBDGC)., Silverberg MS,  
51 Annese V, Hakonarson H, Brant SR, Radford-Smith G, Mathew CG, Rioux JD, Schadt EE,  
52 Daly MJ, Franke A, Parkes M, Vermeire S, Barrett JC, Cho JH. Host-microbe interactions  
53 have shaped the genetic architecture of inflammatory bowel disease. *Nature*. 2012 Nov  
54 1;491(7422):119-24.  
55  
56  
57  
58  
59  
60

1  
2  
3  
4  
5  
6 54. Sokol H, Pigneur B, Watterlot L, Lakhdari O, Bermúdez-Humarán LG, Gratadoux JJ,  
7 Blugeon S, Bridonneau C, Furet JP, Corthier G, Grangette C, Vasquez N, Pochart P, Trugnan  
8 G, Thomas G, Blottière HM, Doré J, Marteau P, Seksik P, Langella P. Faecalibacterium  
9 prausnitzii is an anti-inflammatory commensal bacterium identified by gut microbiota analysis  
10 of Crohn disease patients. *Proc Natl Acad Sci U S A*. 2008 Oct 28;105(43):16731-16736.  
11

12  
13  
14 55. Hampe J, Franke A, Rosenstiel P, Till A, Teuber M, Huse K, Albrecht M, Mayr G, De La  
15 Vega FM, Briggs J, Günther S, Prescott NJ, Onnie CM, Häsler R, Sipos B, Fölsch UR,  
16 Lengauer T, Platzer M, Mathew CG, Krawczak M, Schreiber S. A genome-wide association  
17 scan of nonsynonymous SNPs identifies a susceptibility variant for Crohn disease in  
18 ATG16L1. *Nat Genet*. 2007 Feb;39(2):207-211.  
19

20  
21 56. Colombel JF, Sandborn WJ, Reinisch W, Mantzaris GJ, Kornbluth A, Rachmilewitz D,  
22 Lichtiger S, D'Haens G, Diamond RH, Broussard DL, Tang KL, van der Woude CJ, Rutgeerts  
23 P; SONIC Study Group. Infliximab, azathioprine, or combination therapy for Crohn's disease.  
24 *N Engl J Med*. 2010 Apr 15;362(15):1383-1395.  
25

26  
27 57. Elson CO, Sartor RB, Tennyson GS, Riddell RH. Experimental models of inflammatory  
28 bowel disease. *Gastroenterology*. 1995 Oct;109(4):1344-1367.  
29

30  
31  
32 58. Colombel JF, Sandborn WJ, Rutgeerts P, Enns R, Hanauer SB, Panaccione R, Schreiber S,  
33 Byczkowski D, Li J, Kent JD, Pollack PF. Adalimumab for maintenance of clinical response  
34 and remission in patients with Crohn's disease: the CHARM trial. *Gastroenterology*. 2007  
35 Jan;132(1):52-65.  
36

37  
38  
39 59. Greenstein AJ, Janowitz HD, Sachar DB. The extra-intestinal complications of Crohn's  
40 disease and ulcerative colitis: a study of 700 patients. *Medicine (Baltimore)*. 1976  
41 Sep;55(5):401-412.  
42

43  
44 60. Schroeder KW, Tremaine WJ, Ilstrup DM. Coated oral 5-aminosalicylic acid therapy for  
45 mildly to moderately active ulcerative colitis. A randomized study. *N Engl J Med*. 1987 Dec  
46 24;317(26):1625-1629.  
47

48  
49 61. Fujino S, Andoh A, Bamba S, Ogawa A, Hata K, Araki Y, Bamba T, Fujiyama Y.  
50 Increased expression of interleukin 17 in inflammatory bowel disease. *Gut*. 2003  
51 Jan;52(1):65-70.  
52

53  
54  
55 62. van Dullemen HM, van Deventer SJ, Hommes DW, Bijl HA, Jansen J, Tytgat GN, Woody  
56 J. Treatment of Crohn's disease with anti-tumor necrosis factor chimeric monoclonal antibody  
57  
58  
59

1  
2  
3 (cA2). *Gastroenterology*. 1995 Jul;109(1):129-135.  
4  
5

6  
7 63. Fuss IJ, Neurath M, Boirivant M, Klein JS, de la Motte C, Strong SA, Fiocchi C, Strober  
8 W. Disparate CD4+ lamina propria (LP) lymphokine secretion profiles in inflammatory bowel  
9 disease. Crohn's disease LP cells manifest increased secretion of IFN-gamma, whereas  
10 ulcerative colitis LP cells manifest increased secretion of IL-5. *J Immunol*. 1996 Aug  
11 1;157(3):1261-1270.  
12

13  
14  
15 64. Hampe J, Cuthbert A, Croucher PJ, Mirza MM, Mascheretti S, Fisher S, Frenzel H, King  
16 K, Hasselmeyer A, MacPherson AJ, Bridger S, van Deventer S, Forbes A, Nikolaus S,  
17 Lennard-Jones JE, Foelsch UR, Krawczak M, Lewis C, Schreiber S, Mathew CG. Association  
18 between insertion mutation in NOD2 gene and Crohn's disease in German and British  
19 populations. *Lancet*. 2001 Jun 16;357(9272):1925-1928.  
20

21  
22  
23 65. Present DH, Korelitz BI, Wisch N, Glass JL, Sachar DB, Pasternack BS. Treatment of  
24 Crohn's disease with 6-mercaptopurine. A long-term, randomized, double-blind study. *N Engl*  
25 *J Med*. 1980 May 1;302(18):981-987.  
26

27  
28  
29 66. Abraham C, Cho JH. Inflammatory bowel disease. *N Engl J Med*. 2009 Nov  
30 19;361(21):2066-2078.  
31

32  
33 67. Cario E, Podolsky DK. Differential alteration in intestinal epithelial cell expression of toll-  
34 like receptor 3 (TLR3) and TLR4 in inflammatory bowel disease. *Infect Immun*. 2000  
35 Dec;68(12):7010-7017.  
36

37  
38  
39 68. Lennard-Jones JE. Classification of inflammatory bowel disease. *Scand J Gastroenterol*  
40 *Suppl*. 1989;170:2-6.  
41

42  
43  
44 69. Molodecky NA, Soon IS, Rabi DM, Ghali WA, Ferris M, Chernoff G, Benchimol EI,  
45 Panaccione R, Ghosh S, Barkema HW, Kaplan GG. Increasing incidence and prevalence of the  
46 inflammatory bowel diseases with time, based on systematic review. *Gastroenterology*. 2012  
47 Jan;142(1):46-54.  
48

49  
50  
51 70. Swidsinski A, Ladhoff A, Pernthaler A, Swidsinski S, Loening-Baucke V, Ortner M,  
52 Weber J, Hoffmann U, Schreiber S, Dietel M, Lochs H. Mucosal flora in inflammatory bowel  
53 disease. *Gastroenterology*. 2002 Jan;122(1):44-54.  
54

55  
56 71. Powrie F, Leach MW, Mauze S, Menon S, Caddle LB, Coffman RL. Inhibition of Th1  
57  
58  
59

1  
2  
3 responses prevents inflammatory bowel disease in scid mice reconstituted with CD45RBhi  
4 CD4+ T cells. *Immunity*. 1994 Oct;1(7):553-562.

6  
7 72. Azer SA. Overview of molecular pathways in inflammatory bowel disease associated with  
8 colorectal cancer development. *Eur J Gastroenterol Hepatol*. 2013 Mar;25(3):271-281.

10  
11 73. Azer SA, AlOlayan TI, AlGhamdi MA, AlSanea MA. Inflammatory bowel disease: An  
12 evaluation of health information on the internet. *World J Gastroenterol*. 2017 Mar  
13 7;23(9):1676-1696.

15  
16 74. Börner K, Maru JT, Goldstone RL. The simultaneous evolution of author and paper  
17 networks. *Proc Natl Acad Sci U S A*. 2004 Apr 6;101 Suppl 1:5266-73.

19  
20 75. Azer SA. Exploring the Top-Cited and Most Influential Articles in Medical Education.  
21 *J Contin Educ Health Prof*. 2016 Summer;36 Suppl 1:S32-S41.

23  
24 76. Wren JD, Georgescu C, Giles CB, Hennessey J. Use it or lose it: citations predict the  
25 continued online availability of published bioinformatics resources. *Nucleic Acids*  
26 *Res*. 2017 Apr 20;45(7):3627-3633.

28  
29 77. Shanahan DR. Auto-correlation of journal impact factor for consensus research reporting  
30 statements: a cohort study. *PeerJ*. 2016 Mar 31;4:e1887.

32  
33 78. Royle P, Kandala NB, Barnard K, Waugh N. Bibliometrics of systematic reviews: analysis  
34 of citation rates and journal impact factors. *Syst Rev*. 2013 Sep 12;2:74.

35  
36 79. Falagas ME, Kouranos VD, Michalopoulos A, Rodopoulou SP, Batsiou  
37 MA, Karageorgopoulos DE. Comparison of the distribution of citations received by articles  
38 published in high, moderate, and low impact factor journals in clinical medicine. *Intern Med*  
39 *J*. 2010 Aug;40(8):587-591.

41  
42 80. García-Aroca MÁ, Pandiella-Dominique A, Navarro-Suay R, Alonso-Arroyo A, Granda-  
43 Orive JI, Anguita-Rodríguez F, López-García A. Analysis of Production, Impact, and  
44 Scientific Collaboration on Difficult Airway Through the Web of Science and Scopus (1981-  
45 2013). *Anesth Analg*. 2017 Jun;124(6):1886-1896.

47  
48 81. Tanner-Smith EE, Polanin JR. Brief alcohol intervention trials conducted by higher  
49 prestige authors and published in higher impact factor journals are cited more frequently. *J*  
50 *Clin Epidemiol*. 2016 Feb 6.

1  
2  
3  
4 82. Jagsi R, Guancial EA, Worobey CC, Henault LE, Chang Y, Starr R, Tarbell NJ, Hylek  
5 EM. The "gender gap" in authorship of academic medical literature--a 35-year perspective. *N*  
6 *Engl J Med*. 2006 Jul 20;355(3):281-287.  
7

8  
9  
10 83. Long MT, Leszczynski A, Thompson KD, Wasan SK, Calderwood AH. Female  
11 authorship in major academic gastroenterology journals: a look over 20 years. *Gastrointest*  
12 *Endosc*. 2015;81(6):1440-1447.  
13

14  
15 84. Diamond SJ, Thomas CR Jr, Desai S, Holliday EB, Jagsi R, Schmitt C, Enestvedt BK.  
16 Gender Differences in Publication Productivity, Academic Rank, and Career Duration Among  
17 U.S. Academic Gastroenterology Faculty. *Acad Med*. 2016 Aug;91(8):1158-1163.  
18

19  
20  
21 85. Nicholson JM, Ioannidis JP. Research grants: Conform and be funded. *Nature*. 2012 Dec  
22 6;492(7427):34-36.  
23

24  
25  
26 86. Lauer MS, Danthi NS, Kaltman J, Wu C. Predicting Productivity Returns on Investment:  
27 Thirty Years of Peer Review, Grant Funding, and Publication of Highly Cited Papers at the  
28 National Heart, Lung, and Blood Institute. *Circ Res*. 2015 Jul 17;117(3):239-243.  
29

30  
31  
32 87. Cheng K, Dodson TB, Egbert MA, Susarla SM. Which Factors Affect Citation Rates in  
33 the Oral and Maxillofacial Surgery Literature? *J Oral Maxillofac Surg*. 2017 Apr 1. pii:  
34 S0278-2391(17)30361-0.  
35  
36  
37  
38  
39  
40  
41  
42  
43  
44  
45  
46  
47  
48  
49  
50  
51  
52  
53  
54  
55  
56  
57  
58  
59  
60

## Glossary

**Articles** are scientific written composition representing a substantial advance in the understanding of a topic or problem. They raise questions, provide thoughtful, critical analysis and aim at establishing new directions.

**Basic research** is defined as fundamental research, which aims at improving scientific theories and our understanding of a phenomenon. Basic research may use animal models and include in vivo and in-vitro studies that target advances of fundamental knowledge.

**Clinical research** is defined as research applied to a clinical condition/disease with the aim to test an intervention or make a change to a phenomenon. Basic research usually fuels clinical research.

**Reports** are defined as brief articles with conclusions, results, and recommendations. They report on a substantial advance in an area/topic or a problem and aim at reporting findings and standardization of practice.

**Review and meta-analysis** are defined as an article reviewing the progress of knowledge in a particular topic, critically analysing the current status of knowledge and presenting an understanding of the subject by discussing related literature. A review should identify gaps in the literature and highlight future directions for further research. A **meta-analysis** is defined as a statistical analysis that combines the results from different scientific studies to provide conclusive evidence.

1  
2  
3  
4  
5  
6  
7  
8  
9  
10 **Figure Legend**

11  
12 **Figure 1A:** Number of citations of papers published before the year 2000 (mean±SD)

13  
14  
15 **Figure 1B:** Number of citations of papers published after the year 2000 (mean±SD)

16  
17  
18  
19  
20  
21  
22  
23  
24  
25  
26  
27  
28  
29  
30  
31  
32  
33  
34  
35  
36  
37  
38  
39  
40  
41  
42  
43  
44  
45  
46  
47  
48  
49  
50  
51  
52  
53  
54  
55  
56  
57  
58  
59  
60

For peer review only

1  
2  
3  
4  
5  
6  
7  
8  
9  
10  
11  
12  
13  
14  
15  
16  
17  
18  
19  
20  
21  
22  
23  
24  
25  
26  
27  
28  
29  
30  
31  
32  
33  
34  
35  
36  
37  
38  
39  
40  
41  
42  
43  
44  
45  
46  
47  
48  
49  
50  
51  
52  
53  
54  
55  
56  
57  
58  
59  
60

For peer review only



1  
2  
3  
4  
5  
6  
7  
8  
9  
10  
11  
12  
13  
14  
15  
16  
17  
18  
19  
20  
21  
22  
23  
24  
25  
26  
27  
28  
29  
30  
31  
32  
33  
34  
35  
36  
37  
38  
39  
40  
41  
42  
43  
44  
45  
46  
47

**Table 1** Top cited papers in inflammatory bowel disease identified by searching the Web of Knowledge, summarized by year of publication and category

| Article type         | Year of publication: no of articles [References] |           |           |              |                             |                                          |                                |           |
|----------------------|--------------------------------------------------|-----------|-----------|--------------|-----------------------------|------------------------------------------|--------------------------------|-----------|
|                      | 1950-1958                                        | 1959-1967 | 1968-1976 | 1977-1985    | 1986-1994                   | 1995-2003                                | 2004-2012                      | Total (%) |
| Article              |                                                  |           |           | 1 [36]       | 1 [68]                      |                                          |                                | 2 [4%]    |
| Review/Meta-analysis |                                                  |           | 1 [59]    |              |                             | 5 [26,34,42,48,57]                       | 7 [30,35,38,51,53,66,69]       | 13 [26%]  |
| Report               |                                                  |           |           |              |                             |                                          | 1 [46]                         | 1 [2%]    |
| Research             | 1 [29]                                           |           | 1 [25]    | 3 [40,50,65] | 8 [24,37,39,44,45,49,60,71] | 12 [22,23,27,28,32,43,61,62,63,64,67,70] | 9 [31,33,41,47,52,54,55,56,58] | 34 [68%]  |
| Total (%)            | 1 [2%]                                           | 0 [0%]    | 2 [4%]    | 4 [8%]       | 9 [18%]                     | 17 [34%]                                 | 17 [34%]                       | 50 [100%] |

**Table 2** Top-cited papers in inflammatory bowel disease (IBD) identified by searching the Web of Knowledge, summarized by category and topic

| Topics on IBD                               | Category: no of articles [References] |                          |        |                          | Total (%) |
|---------------------------------------------|---------------------------------------|--------------------------|--------|--------------------------|-----------|
|                                             | Article                               | Review/<br>Meta-analysis | Report | Research                 |           |
| Epidemiology, prevalence                    |                                       | 2 [38,69]                |        |                          | 2 [4%]    |
| CD genetic susceptibility and NOD2 mutation |                                       | 2 [35,51]                |        | 5 [22,23,47,55,64]       | 7 [14%]   |
| Animal models for IBD                       |                                       | 1 [57]                   |        | 5 [24,37,39,44,71]       | 6 [12%]   |
| Pathogenesis of IBD                         |                                       | 6 [26,30,34,48,53,66]    |        | 7 [31,41,54,61,63,67,70] | 13 [26%]  |
| Classification, index of disease activity   | 2 [36,68]                             |                          | 1 [46] | 2 [25,40]                | 5 [10%]   |
| Risk of developing colorectal cancer        |                                       | 1 [42]                   |        | 1 [45]                   | 2 [4%]    |
| Extra-intestinal complications              |                                       | 1 [59]                   |        |                          | 1 [2%]    |
| Infliximab in CD                            |                                       |                          |        | 6 [28,32,33,43,52,56]    | 6 [12%]   |
| Corticosteroids in UC                       |                                       |                          |        | 1 [29]                   | 1 [2%]    |
| Drug treatment and cyclosporine in UC       |                                       |                          |        | 2 [49,50]                | 2 [4%]    |
| Adalimumab in CD                            |                                       |                          |        | 1 [58]                   | 1 [2%]    |
| 5-aminosalicylic acid in UC                 |                                       |                          |        | 1 [60]                   | 1 [2%]    |
| 6-mercaptopurine in CD                      |                                       |                          |        | 1 [65]                   | 1 [2%]    |

1  
2  
3  
4  
5  
6  
7  
8  
9  
10  
11  
12  
13  
14  
15  
16  
17  
18  
19  
20  
21  
22  
23  
24  
25  
26  
27  
28  
29  
30  
31  
32  
33  
34  
35  
36  
37  
38  
39  
40  
41  
42  
43  
44  
45  
46  
47

|                                                         |        |          |        |           |           |
|---------------------------------------------------------|--------|----------|--------|-----------|-----------|
| Monoclonal antibodies, anti-tumor necrosis factor in CD |        |          |        | 2 [27,62] | 2 [4%]    |
| Total (%)                                               | 2 [4%] | 13 [26%] | 1 [2%] | 34 [68%]  | 50 [100%] |

For peer review only

**Table 3.** The journals that published the top-cited inflammatory bowel disease (IBD) articles included in the study, the journal impact factor, and the number of papers published and reference number.

| Journal*                                                                               | 2015-Journal Impact Factor (JIF) | Number of papers published [References]  |
|----------------------------------------------------------------------------------------|----------------------------------|------------------------------------------|
| <i>New England Journal of Medicine</i>                                                 | 59.558                           | 12 [26,27,32,33,43,45,49,52,56,60,65,66] |
| <i>Gastroenterology</i>                                                                | 18.187                           | 10 [25,34,38,39,50,57,58,62,69,70]       |
| <i>Nature</i>                                                                          | 38.138                           | 4 [22,23,30,53]                          |
| <i>Nature Genetics</i>                                                                 | 31.616                           | 4 [35,47,51,55]                          |
| <i>The Lancet</i>                                                                      | 44.002                           | 3 [28,40,64]                             |
| <i>Proceedings of the National Academy of Sciences of the United States of America</i> | 9.423                            | 2 [41,54]                                |
| <i>Cell</i>                                                                            | 28.710                           | 2 [24,37]                                |
| <i>Gut</i>                                                                             | 14.921                           | 2 [42,61]                                |
| <i>British Medical Journal</i>                                                         | 19.697                           | 1 [29]                                   |
| <i>Science</i>                                                                         | 34.661                           | 1 [31]                                   |
| <i>Human Pathology</i>                                                                 | 2.791                            | 1 [36]                                   |
| <i>Laboratory Investigation</i>                                                        | 4.202                            | 1 [44]                                   |
| <i>Canadian Journal of Gastroenterology and Hepatology</i>                             | 2.307                            | 1 [46]                                   |
| <i>Nature Reviews Immunology</i>                                                       | 39.416                           | 1 [48]                                   |
| <i>Medicine (Baltimore)</i>                                                            | 2.133                            | 1 [59]                                   |
| <i>Journal of Immunology</i>                                                           | 4.985                            | 1 [63]                                   |
| <i>Infection and Immunity</i>                                                          | 3.603                            | 1 [67]                                   |
| <i>Scandinavian Journal of Gastroenterology</i>                                        | 2.199                            | 1 [68]                                   |
| <i>Immunity</i>                                                                        | 24.082                           | 1 [71]                                   |

- Gastroenterology related journals (Gastroenterology, Gut, and the Scandinavian Journal of Gastroenterology) only published 13 articles out of the top highly cited 50 articles (26%)

1  
2  
3  
4  
5  
6  
7  
8  
9  
10  
11  
12  
13  
14  
15  
16  
17  
18  
19  
20  
21  
22  
23  
24  
25  
26  
27  
28  
29  
30  
31  
32  
33  
34  
35  
36  
37  
38  
39  
40  
41  
42  
43  
44  
45  
46  
47

**Table 4** Authors and co-authors of two or more articles of the top-cited articles in inflammatory bowel disease identified by searching the Web of Science

| Author's name** | Number [References] |                                | Author's Name** | Number [References] |                   |
|-----------------|---------------------|--------------------------------|-----------------|---------------------|-------------------|
|                 | First author        | Coauthor                       |                 | First author        | Coauthor          |
| Hugot, JP       | 1 [22]              | 2 [35,51]                      | Daly,MJ         | -                   | 5[31,35,47,51,53] |
| Podolsky, DK    | 1 [26]              | 4 [29,30,32,67]                | Steinhart,AH    | -                   | 5[31,35,46,47,51] |
| Targan, SR      | 1 [27]              | 7 [31,32,35,46,47,51,53]       | Griffiths,A     | -                   | 4[31,35,47,51]    |
| Hanauer,SB      | 1 [28]              | 6 [23,27,32,33,49,58]          | Dassopoulos,T   | -                   | 2[31,35]          |
| Xavier,RJ       | 1 [30]              | 3 [35,47,53]                   | Bitton,A        | -                   | 3[31,35,53]       |
| Duerr,RH        | 1 [31]              | 5 [23,35,51,53]                | Datta,LW        | -                   | 3[31,35,47]       |
| Present,DH      | 2 [32,65]           | 3 [27,33,49]                   | Kistner,EO      | -                   | 2[31,35]          |
| Rutgeerts, P    | 1 [33]              | 9 [27,28,32,35,43,51,52,56,58] | Rotter,JI       | -                   | 5[31,35,47,51,53] |
| Fiocchi,C       | 1 [34]              | 1 [63]                         | Schumm,LP       | -                   | 5[31,35,47,51,52] |
| Barrett,JC      | 1 [35]              | 2 [51,53]                      | Lee,J           | -                   | 2[51,53]          |
| Riddell,RH      | 1 [36]              | 2 [46,57]                      | Lees,CW         | -                   | 2[51,53]          |
| Loftus,EV Jr    | 1 [38]              | 1 [46]                         | Sandborn,WJ     | -                   | 3[33,56,58]       |
| Franke,A        | 1 [51]              | 2 [53,55]                      | Barmada,MM      | -                   | 3[31,35,47]       |
| Silverberg,MS   | 1 [46]              | 5 [31,35,47,51,53]             | Nicolae,DL      | -                   | 4[23,31,35,47]    |
| Rioux,JD        | 1 [47]              | 4 [31,35,51,53]                | Sands,BE        | -                   | 3[32,33,52]       |
| Lichtiger,S     | 1 [49]              | 1 [56]                         | Belaiche,J      | -                   | 2[22,35]          |
| Colombel,JF     | 2 [56,58]           | 5 [22,28,33,46,51]             | Laukens,D       | -                   | 3[35,51,53]       |
| Hampe,J         | 2 [55,64]           | -                              | Lawrance,I      | -                   | 2[51,53]          |
| Abraham,C       | 1 [66]              | 2 [31,53]                      | Louis,E         | -                   | 3[35,53,51]       |

|                  |        |                             |                |   |                   |
|------------------|--------|-----------------------------|----------------|---|-------------------|
| Lennard-Jones,JE | 1 [68] | 1 [64]                      | Vos,M          | - | 3[35,51,53]       |
| Becktel, JM      | -      | 2 [25,50]                   | Vermeire,S     | - | 5[35,43,46,51,53] |
| Singleton, JW    | -      | 2 [25,50]                   | Satsangi, J    | - | 4[35,46,51,53]    |
| Kern, F Jr       | -      | 2 [25,50]                   | Bernstein, CN  | - | 2[46,52]          |
| Van Deventer, SJ | -      | 5 [27,32,52,62,64]          | Tremelling, M  | - | 2[35,53]          |
| Mayer, L         | -      | 3 [27,28,32]                | Mansfield, J   | - | 3[35,51,53]       |
| Braakman, T      | -      | 2 [27,32]                   | Jewell, D      | - | 2[35,46]          |
| DeWoody, KL      | -      | 2 [27,32]                   | Mathew, CG     | - | 5[35,51,53,55,64] |
| Schaible, TF     | -      | 2 [27,32]                   | Parkes, M      | - | 3[35,51,53]       |
| Feagan, BG       | -      | 3 [28,33,52]                | Georges, M     | - | 3[35,51,53]       |
| Lichtenstein, GR | -      | 2 [28,33]                   | Karban, A      | - | 2[46,51]          |
| Schreiber, S     | -      | 8 [28,46,51,53,55,58,64,70] | Gossum, A      | - | 2[35,51]          |
| Rachmilewitz, D  | -      | 4 [28,33,52,56]             | Franchimont, D | - | 3[35,51,53]       |
| Wolf, DC         | -      | 2 [28,52]                   | Newman, W      | - | 2[51,53]          |
| Olson, A         | -      | 2 [28,33]                   | Regueiro, M    | - | 5[31,35,47,51,53] |
| Taylor, KD       | -      | 5 [31,35,47,51,53]          | Kornbluth, A   | - | 2[49,56]          |
| Bayless, TM      | -      | 2 [23,51]                   |                |   |                   |
| Cho, JH          | -      | 7 [23,31,35,47,51,53,66]    |                |   |                   |

\*The table is limited to authors and coauthors of two or more articles regardless to the category of the article.

\*\*Author's name= family name, abbreviations of first or first and second names.

1  
2  
3  
4  
5  
6  
7  
8  
9  
10  
11  
12  
13  
14  
15  
16  
17  
18  
19  
20  
21  
22  
23  
24  
25  
26  
27  
28  
29  
30  
31  
32  
33  
34  
35  
36  
37  
38  
39  
40  
41  
42  
43  
44  
45  
46  
47

**Table 5** Grading the top-cited articles in inflammatory bowel disease according to the Oxford Centre for Evidence-based Medicine – Levels of Evidence.

| Level | Characteristics and description                                                            | Articles number [References]                            |
|-------|--------------------------------------------------------------------------------------------|---------------------------------------------------------|
| 1a    | Systematic reviews of RCTs (with consistent results from individual studies)               | -                                                       |
| 1b    | Individual RCT (with narrow confidence intervals)                                          | 10 [27,28,33,49,50,52,56,58,60,65]                      |
| 2a    | Systematic review of cohort studies (with consistent results from individual studies)      | 1 [35]                                                  |
| 2b    | Individual cohort study (including low quality RCT; e.g., <80% follow-up)                  | 3 [32,43,45]                                            |
| 2c    | Outcome studies (analysis of large registries)                                             | 2 [59,69]                                               |
| 3a    | Systemic reviews of case-control studies (with consistent results from individual studies) | 11 [26,30,34,38,42,46,48,51,52,56,66]                   |
| 3b    | Individual case-control study                                                              | 17 [22,23,24,29,31,37,39,41,47,54,55,61,63,64,67,70,71] |
| 4     | Case series (studies without control group, including poor quality cohort studies)         | 5 [25,36,40,44,62]                                      |
| 5     | Expert opinion without explicit critical appraisal or based on research evidence.          | 1 [68]                                                  |

1  
2  
3  
4  
5  
6  
7  
8  
9  
10  
11  
12  
13  
14  
15  
16  
17  
18  
19  
20  
21  
22  
23  
24  
25  
26  
27  
28  
29  
30  
31  
32  
33  
34  
35  
36  
37  
38  
39  
40  
41  
42  
43  
44  
45  
46  
47

For peer review only



1  
2  
3  
4  
5  
6  
7  
8  
9  
10  
11  
12  
13  
14  
15  
16  
17  
18  
19  
20  
21  
22  
23  
24  
25  
26  
27  
28  
29  
30  
31  
32  
33  
34  
35  
36  
37  
38  
39  
40  
41  
42  
43  
44  
45  
46  
47  
48  
49  
50  
51  
52  
53  
54  
55  
56  
57  
58  
59  
60

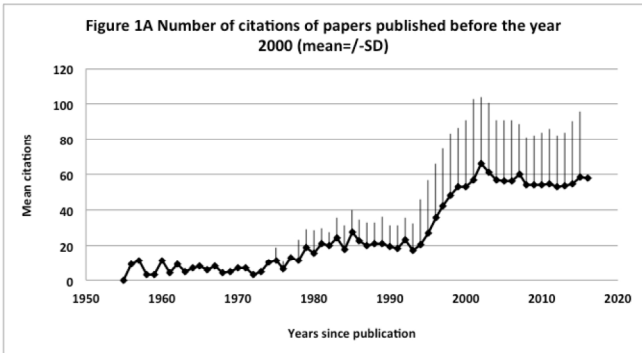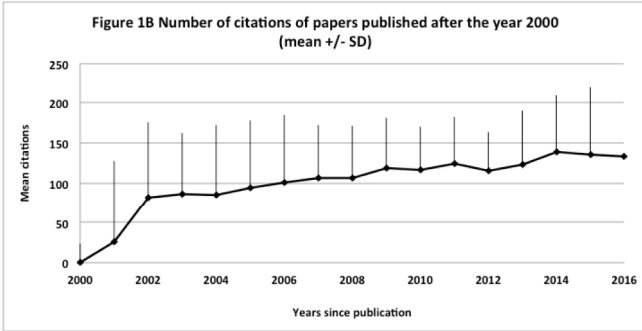

Figure 1A and 1B

209x296mm (300 x 300 DPI)

Appendix 1.Top-cited articles on inflammatory bowel disease identified by searching the Science Citation Index Expanded database<sup>a</sup>

| Rank | Authors, Year [Reference]        | Article ( <i>Journal</i> )                                                                                                                | 2015-JIF | Category          | Number of citations, Web of Knowledge | Average citation per year <sup>b</sup> | Rank of the article in the journal publishing it <sup>c</sup> | Origin: First author's organization, location (country)                                                                                     |
|------|----------------------------------|-------------------------------------------------------------------------------------------------------------------------------------------|----------|-------------------|---------------------------------------|----------------------------------------|---------------------------------------------------------------|---------------------------------------------------------------------------------------------------------------------------------------------|
| 1    | Hugot et al, 2001 <sup>22</sup>  | Association of NOD2 leucine-rich repeat variants with susceptibility to Crohn's disease. ( <i>NATURE</i> ).                               | 38.138   | Basic research    | 3,320                                 | 221.3                                  | 128                                                           | Fondation Jean Dausset CEPH (France)                                                                                                        |
| 2    | Ogura et al, 2001 <sup>23</sup>  | A frameshift mutation in NOD2 associated with susceptibility to Crohn's disease. ( <i>NATURE</i> ).                                       | 38.138   | Basic research    | 3,105                                 | 207.0                                  | 151                                                           | The University of Michigan Medical School, Michigan (United States).                                                                        |
| 3    | Kuhn et al, 1993 <sup>24</sup>   | Interleukin-10-deficient mice develop chronic enterocolitis. ( <i>CELL</i> )                                                              | 28.710   | Basic research    | 2,804                                 | 121.9                                  | 62                                                            | Institute for Genetics, University of Cologne, (Germany)                                                                                    |
| 4    | Best et al, 1976 <sup>25</sup>   | Development of a Crohns-disease activity index-National cooperative Chrons-disease study ( <i>Gastroenterology</i> ).                     | 18.187   | Clinical research | 2,362                                 | 59.0                                   | 2                                                             | Hines Veterans Administration Cooperative Studies Support Center, University of Colorado Medical Center, Denver, Colorado, (United States). |
| 5    | Podolsky, 2002 <sup>26</sup>     | Inflammatory bowel disease. ( <i>New England Journal of Medicine</i> )                                                                    | 59.558   | Review            | 2,261                                 | 161.5                                  | 151                                                           | Massachusetts General Hospital and Harvard Medical School, Boston, Massachusetts (United States).                                           |
| 6    | Targan et al, 1997 <sup>27</sup> | A short-term study of chimeric monoclonal antibody cA2 to tumor necrosis factor alpha for Crohn's disease ( <i>New England Journal of</i> | 59.558   | Clinical research | 2,242                                 | 118.0                                  | 153                                                           | Cedars-Sinai Medical Center, Los Angeles, California (United States)                                                                        |

|    |                                         |                                                                                                                    |        |                   |       |       |     |                                                                                                            |
|----|-----------------------------------------|--------------------------------------------------------------------------------------------------------------------|--------|-------------------|-------|-------|-----|------------------------------------------------------------------------------------------------------------|
|    |                                         | <i>Medicine)</i>                                                                                                   |        |                   |       |       |     |                                                                                                            |
| 7  | Hanauer et al, 2002 <sup>28</sup>       | Maintenance infliximab for Crohn's disease: the ACCENT I randomized trial ( <i>Lancet</i> )                        | 44.002 | Clinical research | 2,126 | 151.8 | 47  | University of Chicago Medical Center, Chicago, IL (United States).                                         |
| 8  | Truelove and Witts, 1955 <sup>29</sup>  | Cortisone in ulcerative colitis- Final report on a therapeutic trial ( <i>British Medical Journal</i> ).           | 19.697 | Clinical research | 1,756 | 28.8  | 17  | Nuffield Department of Clinical Medicine, Oxford (United Kingdom)                                          |
| 9  | Xavier and Podolsky, 2007 <sup>30</sup> | Unravelling the pathogenesis of inflammatory bowel disease ( <i>NATURE</i> )                                       | 38.138 | Review            | 1,693 | 188.1 | 501 | Massachusetts General Hospital, Harvard Medical School, Boston, Massachusetts (United States).             |
| 10 | Duerr et al, 2006 <sup>31</sup>         | A genome-wide association study identifies IL23R as an inflammatory bowel disease gene. ( <i>SCIENCE</i> ).        | 34.661 | Clinical research | 1,683 | 168.3 | 554 | Department of Medicine, School of Medicine, University of Pittsburgh, Pittsburgh, PA (United States).      |
| 11 | Present et al, 1999 <sup>32</sup>       | Infliximab for treatment of fistulas in patients with Crohn's disease ( <i>New England Journal of Medicine</i> )   | 59.558 | Clinical research | 1,615 | 95    | 315 | Mount Sinai Medical Center, New York, NY, (United States)                                                  |
| 12 | Rutgeerts et al, 2005 <sup>33</sup>     | Infliximab for induction and maintenance therapy for ulcerative colitis ( <i>New England Journal of Medicine</i> ) | 59.558 | Clinical research | 1,506 | 136.9 | 318 | University Hospital Gasthuisberg, Leuven, (Belgium).                                                       |
| 13 | Fiocchi, 1998 <sup>34</sup>             | Inflammatory bowel disease: Etiology and pathogenesis ( <i>Gastroenterology</i> )                                  | 18.187 | Review            | 1,490 | 82.8  | 8   | University Hospitals of Cleveland Case Western Reserve University School of Medicine, Ohio (United States) |

|    |                                         |                                                                                                                                                                                                            |        |                      |       |       |     |                                                                                                          |
|----|-----------------------------------------|------------------------------------------------------------------------------------------------------------------------------------------------------------------------------------------------------------|--------|----------------------|-------|-------|-----|----------------------------------------------------------------------------------------------------------|
| 14 | Barrett et al, 2008 <sup>35</sup>       | Genome-wide association defines more than 30 distinct susceptibility loci for Crohn's disease. ( <i>Nature Genetics</i> )                                                                                  | 31.616 | Review Meta-analysis | 1,440 | 180   | 28  | Wellcome Trust Centre for Human Genetics, University of Oxford, Roosevelt Drive, Oxford (United Kingdom) |
| 15 | Riddell et al, 1983 <sup>36</sup>       | Dysplasia in inflammatory bowel disease- Standardized classification with provisional clinical applications ( <i>Human Pathology</i> )                                                                     | 2.791  | Article              | 1,335 | 40.4  | 2   | National Foundation for Ileitis and Colitis, New York, (United States).                                  |
| 16 | Sadlack et al, 1993 <sup>37</sup>       | Ulcerative colitis-like disease in mice with a disrupted interleukin-2 gene ( <i>CELL</i> )                                                                                                                | 28.710 | Basic research       | 1,328 | 57.7  | 370 | Institute of Virology and Immunobiology, University of Würzburg, (Germany)                               |
| 17 | Loftus, 2004 <sup>38</sup>              | Clinical epidemiology of inflammatory bowel disease: Incidence, prevalence, and environmental influences ( <i>Gastroenterology</i> )                                                                       | 18.187 | Review               | 1,295 | 107.9 | 15  | Mayo Clinic, Rochester, Minnesota, (United States)                                                       |
| 18 | Okayasu et al, 1990 <sup>39</sup>       | A novel method in the induction of reliable experimental acute and chronic ulcerative-colitis in mice ( <i>Gastroenterology</i> )                                                                          | 18.187 | Basic research       | 1,266 | 48.7  | 19  | School of Medicine, Tokyo Medical and Dental University, (Japan).                                        |
| 19 | Harvey and Bradshaw, 1980 <sup>40</sup> | A simple index of Crohns-disease activity ( <i>Lancet</i> )                                                                                                                                                | 44.002 | Clinical research    | 1,239 | 34.4  | 173 | Bristol Royal Infirmary and Frenchay Hospital, Bristol (United Kingdom)                                  |
| 20 | Frank et al, 2007 <sup>41</sup>         | Molecular-phylogenetic characterization of microbial community imbalances in human inflammatory bowel diseases. ( <i>Proceedings of the National Academy of Sciences of the United States of America</i> ) | 9.423  | Basic research       | 1,231 | 136.8 | 221 | University of Colorado, Boulder, CO (United States)                                                      |
| 21 | Eaden et al, 2001 <sup>42</sup>         | The risk of colorectal cancer in ulcerative colitis: a meta-analysis. ( <i>Gut</i> ).                                                                                                                      | 14.921 | Review Meta-analysis | 1,178 | 78.5  | 1   | Leicester General Hospital, Gwendolen Road, Leicester (United Kingdom)                                   |

|    |                                       |                                                                                                                                                                                                                                                          |        |                   |       |       |     |                                                                                                                               |
|----|---------------------------------------|----------------------------------------------------------------------------------------------------------------------------------------------------------------------------------------------------------------------------------------------------------|--------|-------------------|-------|-------|-----|-------------------------------------------------------------------------------------------------------------------------------|
| 22 | Baert et al, 2003 <sup>43</sup>       | Influence of immunogenicity on the long-term efficacy of infliximab in Crohn's disease. ( <i>New England Journal of Medicine</i> )                                                                                                                       | 59.558 | Clinical research | 1,112 | 85.5  | 584 | University Hospital Gasthuisberg, Leuven, (Belgium).                                                                          |
| 23 | Cooper et al, 1993 <sup>44</sup>      | Clinicopathologic study of dextran sulfate sodium experimental murine colitis. ( <i>Laboratory Investigation</i> )                                                                                                                                       | 4.202  | Basic research    | 1,088 | 47.3  | 4   | Hahnemann University, Philadelphia, Pennsylvania. (United States)                                                             |
| 24 | Ekbom et al, 1990 <sup>45</sup>       | Ulcerative colitis and colorectal cancer. A population-based study. ( <i>New England Journal of Medicine</i> )                                                                                                                                           | 59.558 | Clinical research | 1,061 | 40.8  | 651 | University Hospital, Uppsala, (Sweden).                                                                                       |
| 25 | Silverberg et al, 2005 <sup>46</sup>  | Toward an integrated clinical, molecular and serological classification of inflammatory bowel disease: report of a Working Party of the 2005 Montreal World Congress of Gastroenterology. ( <i>Canadian Journal of Gastroenterology and Hepatology</i> ) | 2.307  | Report            | 1,043 | 94.8  | 1   | Mount Sinai Hospital IBD Centre, University of Toronto, Toronto, Ontario (Canada)                                             |
| 26 | Rioux et al, 2007 <sup>47</sup>       | Genome-wide association study identifies new susceptibility loci for Crohn disease and implicates autophagy in disease pathogenesis. ( <i>Nature Genetics</i> )                                                                                          | 31.616 | Basic research    | 1,042 | 115.8 | 90  | Université de Montréal and the Montreal Heart Institute, Research Center, Montreal, Quebec (Canada).                          |
| 27 | Bouma and Strober, 2003 <sup>48</sup> | The immunological and genetic basis of inflammatory bowel disease. ( <i>Nature Reviews Immunology</i> )                                                                                                                                                  | 39.416 | Review            | 1,028 | 79.1  | 32  | National Institutes of Health, and National Institutes of Allergy and Infectious Diseases, Bethesda, Maryland (United States) |

|    |                                     |                                                                                                                                                                                                                |        |                      |       |       |     |                                                                                                              |
|----|-------------------------------------|----------------------------------------------------------------------------------------------------------------------------------------------------------------------------------------------------------------|--------|----------------------|-------|-------|-----|--------------------------------------------------------------------------------------------------------------|
| 28 | Lichtiger et al, 1994 <sup>49</sup> | Cyclosporine in severe ulcerative colitis refractory to steroid therapy. ( <i>New England Journal of Medicine</i> )                                                                                            | 59.558 | Clinical research    | 1,026 | 46.6  | 714 | Mount Sinai School of Medicine, New York (United States).                                                    |
| 29 | Summers et al, 1979 <sup>50</sup>   | National Cooperative Crohn's Disease Study: results of drug treatment ( <i>Gastroenterology</i> )                                                                                                              | 18.187 | Clinical research    | 1,020 | 27.6  | 33  | Division of gastroenterology, University of Iowa Medical Center, Iowa City, Virginia, (United States).       |
| 30 | Frank et al, 2010 <sup>51</sup>     | Genome-wide meta-analysis increases to 71 the number of confirmed Crohn's disease susceptibility loci. ( <i>Nature Genetics</i> )                                                                              | 31.616 | Review Meta-analysis | 1,019 | 169.8 | 91  | Institute of Clinical Molecular Biology, Christian-Albrechts-University Kiel, Kiel, (Germany).               |
| 31 | Sands et al, 2004 <sup>52</sup>     | Infliximab maintenance therapy for fistulizing Crohn's disease. ( <i>New England Journal of Medicine</i> )                                                                                                     | 59.558 | Clinical research    | 1,004 | 83.7  | 737 | Massachusetts General Hospital, and Harvard Medical School, Boston (United States)                           |
| 32 | Jostins et al, 2012 <sup>53</sup>   | Host-microbe interactions have shaped the genetic architecture of inflammatory bowel disease. ( <i>Nature</i> )                                                                                                | 38.138 | Review Meta-analysis | 997   | 249.2 | 938 | Wellcome Trust Sanger Institute, Wellcome Trust Genome Campus, Hinxton, Cambridge, ( <i>United Kingdom</i> ) |
| 33 | Sokol et al, 2008 <sup>54</sup>     | Faecalibacterium prausnitzii is an anti-inflammatory commensal bacterium identified by gut microbiota analysis of Crohn disease patients. <i>Proceedings of the National Academy of Sciences of the United</i> | 9.423  | Basic research       | 994   | 124.2 | 318 | Institut National de la Recherche Agronomique U910, Domaine de Vilvert, Jouy-en-Josas, (France).             |

|    |                                      |                                                                                                                                                   |        |                   |     |       |     |                                                                                                                                                         |
|----|--------------------------------------|---------------------------------------------------------------------------------------------------------------------------------------------------|--------|-------------------|-----|-------|-----|---------------------------------------------------------------------------------------------------------------------------------------------------------|
|    |                                      | <i>States of America)</i>                                                                                                                         |        |                   |     |       |     |                                                                                                                                                         |
| 34 | Hampe et al, 2007 <sup>55</sup>      | A genome-wide association scan of nonsynonymous SNPs identifies a susceptibility variant for Crohn disease in ATG16L1. ( <i>Nature Genetics</i> ) | 31.616 | Basic research    | 989 | 109.9 | 95  | Institute for Clinical Molecular Biology, Christian-Albrechts University Kiel, University Hospital Schleswig-Holstein, (Germany).                       |
| 35 | Colombel et al, 2010 <sup>56</sup>   | Infliximab, azathioprine, or combination therapy for Crohn's disease ( <i>New England Journal of Medicine</i> )                                   | 59.558 | Clinical research | 955 | 159.2 | 738 | Hôpital Claude Huriez and Centre d'Investigation Clinique, Centre Hospitalier Universitaire de Lille, Université Lille Nord de France, Lille, (France). |
| 36 | Elson CO et al, 1995 <sup>57</sup>   | Experimental models of inflammatory bowel disease. ( <i>Gastroenterology</i> ).                                                                   | 18.187 | Review            | 913 | 43.5  | 35  | Department of Medicine, University of Alabama Hospital at Birmingham, AL, (United States).                                                              |
| 37 | Colombel et al, 2007 <sup>58</sup>   | Adalimumab for maintenance of clinical response and remission in patients with Crohn's disease: the CHARM trial. ( <i>Gastroenterology</i> ).     | 18.187 | Clinical research | 900 | 100   | 36  | Hôpital Claude Huriez, Centre Hospitalier Universitaire de Lille, Rue Michel Polonovski, Lille, (France)                                                |
| 38 | Greenstein et al, 1976 <sup>59</sup> | The extra-intestinal complications of Crohn's disease and ulcerative colitis: a study of 700 patients. <i>Medicine (Baltimore)</i> .              | 2.133  | Review            | 899 | 22.5  | 10  | Department of Surgery, Mount Sinai School of Medicine and the City University of New York, New York, (United States.)                                   |

|    |                                        |                                                                                                                                                                                                                                                                                |        |                   |     |      |      |                                                                                                                     |
|----|----------------------------------------|--------------------------------------------------------------------------------------------------------------------------------------------------------------------------------------------------------------------------------------------------------------------------------|--------|-------------------|-----|------|------|---------------------------------------------------------------------------------------------------------------------|
| 39 | Schroeder et al, 1987 <sup>60</sup>    | Coated oral 5-aminosalicylic acid therapy for mildly to moderately active ulcerative colitis. A randomized study ( <i>New England Journal of Medicine</i> )                                                                                                                    | 59.558 | Clinical research | 897 | 30.9 | 775  | Mayo Clinic, Rochester, MN (United States)                                                                          |
| 40 | Fujino et al, 2003 <sup>61</sup>       | Increased expression of interleukin 17 in inflammatory bowel disease. ( <i>Gut</i> ).                                                                                                                                                                                          | 14.921 | Basic research    | 850 | 65.4 | 13   | Shiga University of Medical Science, Seta-Tukinowa, Otsu, (Japan).                                                  |
| 41 | Vandullem en et al, 1995 <sup>62</sup> | Treatment of Crohn's disease with anti-tumor necrosis factor chimeric monoclonal antibody (cA2). ( <i>Gastroenterology</i> ).                                                                                                                                                  | 18.187 | Clinical research | 845 | 40.2 | 44   | Academic Medical Center, Amsterdam, (The Netherlands).                                                              |
| 42 | Fuss et al 1996 <sup>63</sup>          | Disparate CD4+ lamina propria (LP) lymphokine secretion profiles in inflammatory bowel disease. Crohn's disease LP cells manifest increased secretion of IFN-gamma, whereas ulcerative colitis LP cells manifest increased secretion of IL-5. ( <i>Journal of Immunology</i> ) | 4.985  | Basic research    | 842 | 42.1 | 69   | National Institute of Allergy and Infectious Diseases, National Institutes of Health, Bethesda, MD, (United States) |
| 43 | Hampe et al, 2001 <sup>64</sup>        | Association between insertion mutation in NOD2 gene and Crohn's disease in German and British populations. ( <i>Lancet</i> ).                                                                                                                                                  | 44.002 | Clinical research | 835 | 55.7 | 444  | Christian-Albrechts-University, Kiel, (Germany).                                                                    |
| 44 | Present et al, 1980 <sup>65</sup>      | Treatment of Crohn's disease with 6-mercaptopurine. A long-term, randomized, double-blind study. ( <i>New England Journal of Medicine</i> )                                                                                                                                    | 59.558 | Clinical research | 834 | 23.2 | 1054 | Lenox Hill Hospital and the Mount Sinai School of Medicine of City University of New York (United States)           |



|    |                                        |                                                                                                                                                                           |        |                |     |       |      |                                                                                                                                                       |
|----|----------------------------------------|---------------------------------------------------------------------------------------------------------------------------------------------------------------------------|--------|----------------|-----|-------|------|-------------------------------------------------------------------------------------------------------------------------------------------------------|
| 45 | Abraham et al, 2009 <sup>66</sup>      | Inflammatory bowel disease. ( <i>New England Journal of Medicine</i> )                                                                                                    | 59.558 | Review         | 817 | 116.7 | 1099 | Yale University School of Medicine, New Haven, CT (United States)                                                                                     |
| 46 | Cario and Podolsky, 2000 <sup>67</sup> | Differential alteration in intestinal epithelial cell expression of toll-like receptor 3 (TLR3) and TLR4 in inflammatory bowel disease. ( <i>Infection and Immunity</i> ) | 3.603  | Basic research | 814 | 50.9  | 6    | Massachusetts General Hospital, and Harvard Medical School, Center for the Study of Inflammatory Bowel Disease, Boston, Massachusetts (United States) |
| 47 | Lennard-Jones, 1989 <sup>68</sup>      | Classification of inflammatory bowel disease. ( <i>Scandinavian Journal of Gastroenterology</i> )                                                                         | 2.199  | Article        | 814 | 30.1  | 2    | St Mark's Hospital, London, (United Kingdom)                                                                                                          |
| 48 | Molodecky et al, 2012 <sup>69</sup>    | Increasing incidence and prevalence of the inflammatory bowel diseases with time, based on systematic review. ( <i>Gastroenterology</i> ).                                | 18.187 | Review         | 809 | 202.2 | 45   | University of Calgary, Calgary, Alberta, (Canada).                                                                                                    |
| 49 | Swidsinski et al, 2002 <sup>70</sup>   | Mucosal flora in inflammatory bowel disease. ( <i>Gastroenterology</i> ).                                                                                                 | 18.187 | Basic research | 806 | 57.6  | 49   | Charité Humboldt Universität, Berlin, (Germany).                                                                                                      |
| 50 | Powrie et al, 1994 <sup>71</sup>       | Inhibition of Th1 responses prevents inflammatory bowel disease in scid mice reconstituted with CD45RBhi CD4+ T cells. ( <i>Immunity</i> ).                               | 24.082 | Basic research | 804 | 36.5  | 41   | DNAX Research Institute of Molecular and Cellular Biology Incorporated, Palo Alto, California (United States).                                        |

1  
2  
3  
4  
5  
6 <sup>a</sup> The search was conducted in November 2016 by searching the Web of Knowledge (1900 to 2016).

7 <sup>b</sup> Because the article by Cario and Podolsky (2000) and the article by Lennard-Jones (1989) had the same absolute number of citations, the paper with higher  
8 average citation per year was ranked higher. The average citation per year for Cario and Podolsky was 50.9 (ranked 46) and the paper by Lennard-Jones had  
9 an average citation per year of 30.1 (ranked 47).

10 <sup>c</sup> This ranking was identified by searching each journal for a top-cited article and identifying its ranking based on the number of citations received in  
11 comparison to the number of citations received by other articles published in that journal.  
12  
13  
14  
15  
16  
17  
18  
19  
20  
21  
22  
23  
24  
25  
26  
27  
28  
29  
30  
31  
32  
33  
34  
35  
36  
37  
38  
39  
40  
41  
42  
43  
44  
45  
46

For peer review only

1  
2  
3  
4  
5  
6  
7  
8  
9  
10  
11  
12  
13  
14  
15  
16  
17  
18  
19  
20  
21  
22  
23  
24  
25  
26  
27  
28  
29  
30  
31  
32  
33  
34  
35  
36  
37  
38  
39  
40  
41  
42  
43  
44  
45  
46

For peer review only

# BMJ Open

## What can we learn from top-cited articles in inflammatory bowel disease? A bibliometric analysis and assessment of the level of evidence

|                                 |                                                                                                                                                 |
|---------------------------------|-------------------------------------------------------------------------------------------------------------------------------------------------|
| Journal:                        | <i>BMJ Open</i>                                                                                                                                 |
| Manuscript ID                   | bmjopen-2017-021233.R1                                                                                                                          |
| Article Type:                   | Research                                                                                                                                        |
| Date Submitted by the Author:   | 01-May-2018                                                                                                                                     |
| Complete List of Authors:       | Azer, Samy; King Saud University, Medical Education; Australian Professional Teaching, Azer, Sarah; St Vincent Hospital                         |
| <b>Primary Subject Heading</b>: | Gastroenterology and hepatology                                                                                                                 |
| Secondary Subject Heading:      | Gastroenterology and hepatology, Medical education and training, Medical publishing and peer review                                             |
| Keywords:                       | Inflammatory bowel disease (IBD), Ulcerative colitis (UC), Crohn's disease (CD), Bibliometric analysis, Top-cited articles, Quality of evidence |
|                                 |                                                                                                                                                 |

SCHOLARONE™  
Manuscripts

1  
2  
3 Amended version  
4  
5  
6  
7  
8

9  
10 **What can we learn from top-cited articles in**  
11 **inflammatory bowel disease? A bibliometric analysis**  
12 **and assessment of the level of evidence**  
13  
14

15  
16  
17  
18 Samy A. Azer<sup>1</sup> and Sarah Azer<sup>2</sup>  
19

20  
21 Dr Azer is a Consultant Gastroenterologist and Professor of Medical  
22 Education and the chair of Curriculum Development and Research Unit,  
23 College of Medicine, King Saud University, Riyadh, Saudi Arabia<sup>1</sup>  
24  
25

26  
27  
28 Registrar, St Vincent Hospital, University of Melbourne, Victoria,  
29 Australia<sup>2</sup>  
30  
31

32  
33  
34 Correspondence and requests for reprints should be addressed to:

35 Professor Samy Azer  
36 Curriculum Development and Research Unit,  
37 College of Medicine, King Saud University  
38 P O Box 2925, Riyadh 11461  
39 Saudi Arabia  
40 Telephone: (966) 11-4699178  
41 Fax: (966) 11-4699174  
42  
43  
44  
45

46 Email:azer2000@optusnet.com.au  
47  
48  
49  
50  
51

52 SHORT TITLE: Top-cited Inflammatory Bowel Disease  
53  
54  
55  
56  
57  
58  
59  
60

## ABSTRACT

**Background and Objectives:** Despite increasing number of publications in inflammatory bowel disease (IBD) no bibliometric analysis has been conducted to evaluate the significance of highly-cited articles. Our objectives were to identify the top-cited articles in IBD, assessing their characteristics, and determining the quality of evidence provided by these articles.

**Design and outcome measures:** IBD and related terms were used in searching the Web of Science to identify English language articles. The 50 top-cited articles were analyzed by year, journal impact factor (JIF), authorship, females in authorship, institute, country, and grants received. The level of evidence was determined using the Oxford Centre for Evidence-Based Medicine guidelines.

**Results:** The number of citations varied from 871 to 3555 with a total of 74638, and a median 1339.50, (IQR= 587). No correlations were found between the number of citations and number of years since publication ( $r=0.042$ ,  $p=0.771$ ), JIF ( $r= 0.186$ ,  $p=0.196$ ), number of authors ( $r= 0.061$ ,  $p=0.674$ ), females in authorship ( $r=0.064$ ,  $p=0.661$ ), number of institutes ( $r= 0.076$ ,  $p=0.602$ ), number of countries ( $r= 0.101$ ,  $p=0.483$ ), or number of grants ( $r= - 0.015$ ,  $p=0.915$ ). The first authors were from the United States ( $n= 24$ ), United Kingdom ( $n= 6$ ), Germany ( $n=5$ ), France ( $n=5$ ), Belgium ( $n=3$ ), and Canada ( $n=3$ ). The levels of evidence were 12 articles at level 1b, 9 articles at level 3a, and 15 articles at level 3b and fewer were at other levels.

**Conclusions:** Research papers represented 66% of articles. The majority of items have reasonably high levels of evidence; which may have contributed to the higher number of citations. The study also shows a gender gap in authorship in this area.

## Key words

Inflammatory bowel disease (IBD), Ulcerative colitis (UC), Crohn's disease (CD), Top-cited articles, Bibliometric analysis, Quality of evidence, Number of authors, Female authors, Grants/funds, Institutes, Countries.

### Strengths and limitations of the study

- More than one method was used in searching the Web of Science to maximize the yield of the search.
- The articles represent a historic perspective on key discoveries in the area of inflammatory bowel disease.
- A number of characteristics including journal impact factor, number of authors, number of females in authorship, number of institutes, number of countries involved, and grants received have been studied against citations received.
- The level of evidence for each article has been evaluated.
- The search was limited to articles in the English language, raising the possibility of failing to include top-cited articles in other languages.

## INTRODUCTION

The number of citations received by an article has been used for several years by universities and grant funding bodies in assessing the quality of research produced by researchers, ranking research performance and in making decisions regarding professional promotion and grant applications [1-4]. Thomson Reuters gather the names of these authors in the Highly Cited Researchers database where they are acknowledged for the quality of their work and the size of their research input in a particular area [5]. Although the number of citations cannot explain why researchers cited a particular paper nor reflect the quality of the research and the outcomes identified in a manuscript, the number of citations and the reputation of contribution to research in a particular field cannot be ignored. This is particularly important when there is a pattern of consistency and progressive input into a discipline over years (a life experience), and a demonstration from publication records and citation history of collaboration with other researchers from other institutes at local and international levels. Hence the credits given to an author or a group of authors and the impact of the work in a particular area can be proportionally related to the citation records [6]. The greater the citation history over years, the more influential they are in their specialty [7]. In this study, we hypothesized that examining the most cited in IBD may provide more insight into the significance of these articles and the level of evidence they present [8]. Considering the fact that there are over 91,000 articles on IBD in the literature as per our preliminary search of Web of Science, it is important to consider the characteristics of highly cited articles.



1  
2  
3 Inflammatory bowel disease comprises ulcerative colitis (UC) and Crohn's disease  
4 (CD); both pursue a relapsing and remitting course over years. While the two  
5  
6 diseases share several similarities, they have a number of differences with regard to  
7  
8 structures involved, pathogenesis, clinical presentation, and management  
9  
10 approaches. UC was first reported briefly in mid 1800 [9], while CD was reported in  
11  
12 *the Journal of the American Medical Association (JAMA)* later by Crohn, Ginzburg  
13  
14 and Oppenheimer in 1932 [10]; describing it as a chronic inflammatory bowel disease  
15  
16 of the ileum. Later, it was discovered that CD can involve any part of the  
17  
18 gastrointestinal tract from the lips to the anal margin but the ileocolonic disease  
19  
20 represents the common presentation. Since then both diseases have been  
21  
22 extensively researched in their different aspects.  
23  
24  
25  
26  
27  
28

29 We assumed that these articles may be a cornerstone in IBD, and may enable  
30  
31 researchers in understanding a range of aspects related to IBD. Therefore, the  
32  
33 bibliometric analysis of these articles including journal impact factor, authorship,  
34  
35 females in authorship, institute, country and grants received may explain key features  
36  
37 of a successful or influential article in IBD. The aims of the present research were (1)  
38  
39 identify the top-cited articles in IBD, and analyze their characteristics and (2) assess  
40  
41 the quality of evidence provided by articles.  
42  
43  
44  
45

## 46 **METHODS**

### 47 **Study Design**

48  
49  
50 The Web of Science database was searched for the identification of the top-cited  
51  
52 articles and tracking the citation records of each publication. Although Scopus and  
53  
54  
55  
56  
57  
58  
59  
60

1  
2  
3 Google Scholar also provide citation records, it was decided to limit the search to  
4  
5 Web of Science database. Compared to other databases, the Web of Science is  
6  
7 regularly updated and the 2015 Journal Citation Reports (JCRs) included more than  
8  
9 6,500 journals across 150 disciplines. Although Google Scholar database is freely  
10  
11 available, it was not used because it is difficult to search, and it cites textbooks,  
12  
13 monographs, conference proceedings, as well as non-peer reviewed publications  
14  
15 [11]. It is also not possible to track the yearly records of citations attracted by each  
16  
17 article since publication. Scopus database was not used because it is not extensive in  
18  
19 its coverage and its records only go back to 1996 [12]. Furthermore, several other  
20  
21 researchers have used Web of Science to identify top-cited articles [13,14,15]  
22  
23  
24  
25

26  
27 To achieve the aims of this study we planned to identify the highly cited articles in IBD  
28  
29 and assess if there were any correlation between the number of citations and any of  
30  
31 the parameters characterizing these highly cited articles. We also aim to grade each  
32  
33 article against the level of evidence hierarchy as per the Oxford Centre for Evidence-  
34  
35 Based Medicine (OCEBM-2011 Levels of Evidence and the accompanying Table of  
36  
37 Evidence Glossary) [16,17].  
38  
39  
40

### 41 **Searching the Web of Science database**

42  
43  
44 On 15 and 16 April 2018, the authors searched the Web of Science database to  
45  
46 retrieve top-cited articles in inflammatory bowel disease. The search words used  
47  
48 were the following: “Inflammatory bowel disease”, “Ulcerative colitis”, “Crohn’s  
49  
50 disease”, “IBD”, “Experimental colitis”, “Animal models for Colitis”, “Animal models for  
51  
52 inflammatory bowel disease”, “Pathology IBD”, “Pathology UC”, “Pathology CD”,  
53  
54  
55  
56  
57  
58  
59  
60

1  
2  
3 “Pathogenesis IBD”, “Pathogenesis UC”, “Pathogenesis CD”, “Treatment IBD”,  
4  
5 “Treatment UC”, “Treatment CD”, “Investigation IBD” and “Regional ileitis”. To  
6  
7 increase the yield of the search, we used the full terms- inflammatory bowel disease,  
8  
9 ulcerative colitis, and Crohn’s disease for the abbreviations IBD, UC, and CD,  
10  
11 respectively. These search words were identified from the terminology used in  
12  
13 gastroenterology journals and the proceedings of major conferences on inflammatory  
14  
15 bowel disease and gastroenterology such as the British Society of Gastroenterology  
16  
17 (BSG), the American Gastroenterological Association (AGA), American College of  
18  
19 Gastroenterology (ACG), Canadian Association of Gastroenterology (CAG), Scottish  
20  
21 Society of Gastroenterology (SSG), and Gastroenterological Society of Australia  
22  
23 (GESA). For each search word, the results were arranged using a link on the Web of  
24  
25 Science system, “sort-by” – “Time Cited- highest to lowest”. The results showed the  
26  
27 articles organized in a descending order with the articles most frequently cited at the  
28  
29 top. A copy of the results was printed out for further analysis. The findings from each  
30  
31 search word were then arranged on one Excel sheet (Microsoft Excel 2010, Microsoft  
32  
33 Corp, Redmond, WA) in descending order based on the number of citations.  
34  
35 Duplicate articles and articles not in the English language were excluded. In addition  
36  
37 to the absolute number of citations, we calculated the average citations per year for  
38  
39 each article. The average number of citations per year is the ratio calculated from the  
40  
41 number of citations obtained by an article divided by the number of years since  
42  
43 publication [18].  
44  
45  
46  
47  
48  
49  
50  
51

52 Using the above mentioned search words, we conducted another search of major  
53  
54 gastroenterology journals and the 2016-JCR under the category “Gastroenterology  
55  
56  
57  
58  
59  
60

1  
2  
3 and Hepatology". This category comprises 76 journals at the time of conducting the  
4 search; of these seven journals were in languages other than English and were not  
5 searched. Gastroenterology journals publishing articles not in the English language  
6 were excluded because neither the author nor the assistant researchers are  
7 competent in the Spanish, Italian or German languages. Since the language  
8 recommended by the journal publishing this work is English and its readers are most  
9 likely interested in research publications in the English language, we decided not to  
10 search these journals.  
11

12 Interestingly, after identifying the list of top-cited articles in IBD, and again checking  
13 these seven non-English journals, none had a paper with a citation higher than the  
14 paper ranked number 50 on the list.  
15

16 These key words were also used in searching the websites of major general  
17 medicine, surgery and research journals including the *New England Journal of*  
18 *Medicine*, *Lancet*, *the British Medical Journal*, *the Journal of the American Medical*  
19 *Association*, *Annals of Internal Medicine*, *Archives of Medicine*, *PLOS Medicine*,  
20 *Annals of Surgery*, *Archives of Surgery*, *British Journal of Surgery*, *American Journal*  
21 *of Surgical Pathology*, *Nature*, *Science*, *Nature Reviews Cancer*, *Nature Genetics*,  
22 *Nature Medicine*, *Cell*, *Nature Reviews Microbiology*, *Immunity*, *Nature Reviews*  
23 *Immunology*, *Nature Reviews Molecular Cell Biology*, and *Journal of Immunology*.  
24

25 A list identifying the 50 top-cited articles was reviewed again and checked regarding  
26 authorship, year of publication, title of the article, journal publishing the work, the  
27 Journal Impact Factor (JIF) at the time of the search, the number of citations and the  
28 institution of the first author (Appendix 1).  
29

1  
2  
3 =====Add Appendix 1 =====  
4  
5

## 6 **Inclusion And Exclusion Criteria**

7  
8

9 The inclusion criteria were: papers focusing on IBD (ulcerative colitis or Crohn's  
10 disease) written in the English language. The exclusion criteria were: (i) articles on  
11 inflammatory bowel disease in languages other than English, (ii) articles that focused  
12 on other diseases and inflammatory bowel disease was not the main focus, and (iii)  
13 studies that focus on other types of colitis and not inflammatory bowel disease.  
14  
15  
16  
17  
18  
19  
20

## 21 **Assessing Articles**

22  
23

24 The full text of the identified 50-top cited articles was obtained and a copy was given  
25 to each researcher. The following information was collected for each article: (i) the  
26 authors' names, the number of authors, their affiliations, and the number of females  
27 contributing to authorship, (ii) the number of institutes involved in the publication, (iii)  
28 the city and country of the origin of the publication, (iv) the total number of citations  
29 obtained up to the day of searching the database, and the number of yearly citations  
30 since publication, (v) the year of publication and the calculated number of years since  
31 publication, and (vi) the number of funds/grants stated in the publication and the Web  
32 of Science.  
33  
34  
35  
36  
37  
38  
39  
40  
41  
42  
43  
44  
45

46 We have not used the classification provided by the Web of Science regarding study  
47 type because we noted that the Web of Science groups publications as original  
48 research, articles, practical guides and reviews and identifies them as articles or  
49 reviews. For consistency and the purpose of this study, the top-cited articles were  
50 grouped into four types - article, review paper/meta-analysis, report, and research. A  
51  
52  
53  
54  
55  
56  
57  
58  
59  
60

1  
2  
3 definition of each type is given in the glossary. Two researchers independently  
4 allocated each of the top-cited articles under its type as per the definition given. Any  
5 differences between the researchers were discussed in a meeting until a decision  
6 was reached.  
7  
8  
9  
10  
11  
12

13 The topics covered by the top-cited articles were identified by each researcher  
14 independently and were discussed in a meeting to harmonize the grouping into a  
15 logical, simple and practical way. Articles that covered more than one topic were  
16 classified on the basis of the aim of the study and the main outcomes. For other  
17 evaluations of an article including the number of authors, the number of females  
18 represented in authorship, the number of institutes, and countries contributing to the  
19 work, and the number of grants/funds received we checked the original article for  
20 such details. Institute was defined as the university where an author belonged. If an  
21 author belonged to two universities, this was considered to be two different institutes.  
22 Regarding the identification of females in the authorship we noted that several  
23 journals use abbreviations of the first and second name rather than the full name. In  
24 order to identify the females in these articles we tried to search the Google database  
25 to find the university, personal website of the author, their LinkedIn or ResearchGate  
26 accounts. We also tried to identify them by searching the Google Scholar database  
27 and identify their account, where we can find other publications under their name and  
28 the full first name. In two papers, despite our efforts, we failed to identify the gender  
29 of five authors and we contacted the corresponding authors. We received a response  
30 from one correspondence, making us unable to identify the gender of three authors in  
31 the second paper.  
32  
33  
34  
35  
36  
37  
38  
39  
40  
41  
42  
43  
44  
45  
46  
47  
48  
49  
50  
51  
52  
53  
54  
55  
56  
57  
58  
59  
60

## Evaluating the Journals

The publishing journals of the top 50 articles in IBD were identified and evaluated in regard to the following: (i) the 2016-Journal Impact Factor (JIF) of each journal, and (ii) the ranking order of each article in comparison to other articles published in that journal. This was based on the number of citations obtained in comparison to the citation numbers received by other articles published in the journal. For example, an article ranked number one, in its publishing journal, means that the article received the highest number of citations in comparison to all other articles published in that journal. This evaluation aimed at assessing the position order of articles identified among the 50 top-cited articles in IBD in regard to their ranking among other articles published in the journal. Such assessment highlights the significance of the inflammatory bowel disease articles among other topics published in gastroenterological journals as well as general medicine journals such as *The New England Journal of Medicine*, *The Lancet*, *the British Medical Journal*, *Medicine*, and top research journals such as *Nature*, *Nature Genetics*, *Science*, *Cell*, and top journals in immunology such as *Nature Reviews Immunology* (Appendix 1).

## Assessing Level of Evidence

Two researchers independently used the Oxford Centre for Evidence-Based Medicine (OCEBM-2011 Levels of Evidence and the accompanying Table of Evidence Glossary) [16,17] to rank each article regarding level of evidence. In 1998 this hierarchical of evidence was first produced to make the process of finding relevant evidence feasible. Since then the levels have been reviewed and amended, and the

1  
2  
3 version used in this research is the currently available version. This evaluation aimed  
4  
5 at identifying the level of evidence of each article and assessing whether the highly  
6  
7 cited articles have received higher scores in regard to level of evidence as per the  
8  
9 Oxford hierarchy. The assessment required extensive review of each article since  
10  
11 quality descriptors exist for different types of studies and level of evidence vary  
12  
13 depending on therapeutic, prevention, prognostic, diagnostic, or prevalence design  
14  
15 [13,14].  
16  
17  
18  
19

### 20 **Statistical Analysis**

21  
22  
23 Pearson's correlation coefficient ( $r$ ) was calculated to determine if the high citation  
24  
25 numbers obtained was related to the age of the article. Other correlations were  
26  
27 between the number of citations and the number of authors, the percentage of  
28  
29 females in authorship, the number of institutes, the number of countries involved, the  
30  
31 number of grants received, and the Journal Impact Factor (JIF) of the journals in  
32  
33 which articles were published. Because of the assumption that researchers usually  
34  
35 cite recently published articles, it was decided to compare the mean yearly citations  
36  
37 received of articles published before the year 2000 and compare them with those  
38  
39 published after the year 2000. All analyses were conducted using SPSS Software  
40  
41 (IBM SPSS Statistics Premium version 22.0 for Mac OS-SPSS Inc., Chicago, IL,  
42  
43 USA) and the results were reported at total, mean, median, IQR, and percentage.  
44  
45  
46 The inter-rater agreement between evaluators was calculated using the Fleiss kappa  
47  
48 scale [19].  
49  
50  
51  
52  
53  
54  
55  
56  
57  
58  
59  
60



## Patient and Public involvement

This study did not involve patients or the public.

## RESULTS

### Top-Cited Papers Identified

Appendix 1 summarizes the top-cited articles in IBD identified by searching the Web of Science [20-69]. The articles are listed in a descending order from 1 to 50 with the highest absolute citation number is ranked 1 and the article with the lowest citation ranked 50 as per the day of the search.

Table 1 summarizes the year of publication and article type. The articles were published over 57 years (from 1955 to 2012). During the period from 1955 to 1976, only 3 articles (6%) were published. However, the number increased significantly from 1977 to 1994 making a total of 12 (24%) articles. The number of publications increased significantly to 35 (70%) during the years from 1995 to 2012. No correlation was found between the number of citations of these papers and the number of years since published (Pearson correlation ( $r$ ) = 0.042,  $p$  = 0.771). To assess if there were differences between old articles (published before the year 2000) and those published after the year 2000, it was decided to study the mean number of citations received by top-cited articles in each year after their publications. The year 2000 was taken as a midpoint for comparison because the majority of articles identified were published in the period after the year 1986, and hence the year 2000 could represent such point. As shown from Figures 1A and 1B, the mean numbers of citations were higher for articles published after the year 2000 compared to those published before

1  
2  
3 the year 2000. Approximately one fourth of the top-cited papers were reviews/meta-  
4 analysis (n= 14, 28%), two-thirds were research papers (n= 33, 66%), and the  
5  
6 remaining were an article (n= 1, 2%) and two reports (n=2, 4%).  
7  
8  
9

10  
11 =====Please Add Table 1 here =====  
12

13  
14 Table 2 summarizes the distribution of IBD topics covered in the top-cited articles.  
15

16 These can be summarized as follows: epidemiology and prevalence (n=2, 4%),  
17  
18 Crohn's disease genetic susceptibility and NOD2 mutation (n=6, 12%), Animal  
19  
20 models (n= 5, 10%), Pathogenesis of IBD (n= 15, 30%), classification and index of  
21  
22 disease activity (n= 5, 10%), risk of developing colorectal cancer (n= 2, 4%), extra-  
23  
24 intestinal complications (n= 1, 2%), Infliximab in Crohn's disease (n= 6, 12%),  
25  
26 corticosteroids in ulcerative colitis (n=1, 2%), drug treatment and cyclosporine in  
27  
28 ulcerative colitis (n= 2, 4%), adalimumab in Crohn's disease (n=1, 2%), 5-  
29  
30 aminosalicylic acid in ulcerative colitis (n=1, 2%), 6-mercaptopurine in Crohn's  
31  
32 disease (n=1, 2%), and monoclonal antibiotics, and anti-tumour necrosis factor in  
33  
34 Crohn's disease (n=2, 4%). As shown in Appendix 1, 14 (28%) were basic research  
35  
36 and 19 (38%) were clinical research. The level of evidence is discussed later in the  
37  
38 results.  
39  
40  
41  
42  
43  
44

45 =====Please Add Table 2 here =====  
46

47  
48 The articles were published in the following journals: *New England Journal of*  
49  
50 *Medicine* (n= 12, 24%), *Gastroenterology* (n= 12, 24%), *Nature* (n=4, 8%), *Nature*  
51  
52 *Genetics* (n=4, 8%), *The Lancet* (n= 2, 4%), *Proceedings of the National Academic of*  
53  
54  
55  
56  
57  
58  
59  
60

1  
2  
3 *Sciences of the United States of America* (n=2, 4%), *Cell* (n= 2, 4%), and *Gut* (n= 4,  
4  
5 8%). See Table 3 for more details about the journals publishing these articles.  
6  
7  
8  
9  
10

11  
12 =====Please Add Table 3 here =====  
13

14  
15 Looking at the ranking of the top-cited articles in IBD in the journals they were  
16  
17 published in could provide a better picture about the influence of these articles. This  
18  
19 influence would be clearly demonstrated when the journal has a relatively higher  
20  
21 Journal Impact Factor. The ranking is based on the number of citations received by  
22  
23 an article compared to the number of citations received by other articles that were  
24  
25 published in that journal. The article by Best et al (1976) [23] is ranked number 4 in  
26  
27 the list, and also ranked number 2 among all articles published in *Gastroenterology*  
28  
29 (2016-JIF = 18.392). The article by Eaden et al [41] is ranked number 22 in the list  
30  
31 and also ranked number 1 among all articles published in *Gut* (2016-JIF= 16.658).  
32  
33 The ranking of other articles in List and their rankings in the journals in which they  
34  
35 were published are shown in Appendix 1.  
36  
37  
38  
39  
40

41 The first authors of the top-cited articles were from the United States (n= 24, 48%),  
42  
43 the United Kingdom (n=6, 12%), Germany (n= 5, 10%), France (n= 5, 10%), Belgium  
44  
45 (n= 3, 6%), Canada (n= 3, 6%), Japan (n=2, 4%), Sweden (n=1, 2%), and the  
46  
47 Netherlands (n=1, 2%).  
48  
49  
50

51 Table 4 summarises the 70 authors who have published two papers or more in the  
52  
53 top-cited IBD. Of these 18 authors were the first author and coauthors of more than  
54  
55 two papers in total, all the remaining, 52 were coauthors of more than two papers.  
56  
57  
58  
59  
60

1  
2  
3 Top authors were Rutgeers, P (n=10 papers), Targan, SR (n=8 papers), Schreiber, S  
4 (n=7 papers), Cho, JH (n=7 papers), Colombel, JF (n=7 papers), Hanauer, SB (n=7  
5 papers), Silverberg, MS (n=6 papers), and each of the following authors have 5  
6 papers: Podolsky, DK, Rioux, JD, Daly MJ, Steinhart, AH, Rotter, JI, Schumm, LP,  
7 Taylor, KD, Vermeire, S, Duerr, RH, and Regueiro, M.  
8  
9

10  
11  
12  
13  
14  
15 =====Please Add Table 4 here =====  
16

17  
18 The leadership of universities and institutes that have contributed to the creation of  
19 these publications were Massachusetts General Hospital and Harvard Medical  
20 School, Boston, Massachusetts, the United States, Mount Sinai School of Medicine,  
21 New York, the United States, Mayo Clinic, Rochester, Minnesota, the United States,  
22 Cedars-Sinai Medical Center, Los Angeles, California, the United States, University of  
23 Chicago Medical Center, Chicago, Illinois, the United States, University of Pittsburgh,  
24 Pittsburgh, Pennsylvania, the United States, University Hospital of Cleveland Case  
25 Western Reserve University School of Medicine, Ohio, the United States, Wellcome  
26 Trust Centre for Human Genetics, University of Oxford, Roosevelt Drive, Oxford, the  
27 United Kingdom, Wellcome Trust Sanger Institute, Wellcome Trust Genome Campus,  
28 Cambridge, the United Kingdom, and Institute of Virology and Immunobiology,  
29 University of Würzburg, Germany. See Appendix 1 for more detail.  
30  
31  
32  
33  
34  
35  
36  
37  
38  
39  
40  
41  
42  
43  
44  
45

#### 46 47 **Characteristics of the Top-Cited Articles** 48

49  
50 These articles were created by 667 authors, median 7.0, minimum 1, maximum 106,  
51 IQR 9.5; the females in authorship were 111, median 1.0, minimum 0, maximum 20,  
52 IQR 2. It is worth mentioning here that it was difficult to identify the gender of some  
53  
54  
55  
56  
57  
58  
59  
60

1  
2  
3 authors in two papers because the full first and middle names were not shown and it  
4 was difficult to find more information or clues to make a decision. We contacted the  
5  
6 corresponding authors of these two articles; we received information for one article  
7  
8 but we had no response from the corresponding author of the second article. Thus  
9  
10 the gender of three authors could not be identified. The number of institutes involved  
11  
12 were 436, median 3.0, minimum 1, maximum 88, IQR 9; the countries involved were  
13  
14 141, median 1.0, minimum 1, maximum 16, IQR 2.75; and the number of grants/funds  
15  
16 were 328, median 1.0, minimum 0, maximum 94, IQR 2.75. No correlations were  
17  
18 found between the number of citations and the Journal Impact Factor (JIF) (Pearson  
19  
20 correlation ( $r = 0.186$ ;  $p=0.196$ ), the number of authors ( $r =0.061$ ;  $p= 0.674$ ), number  
21  
22 of females in authorship ( $r =0.064$ ;  $p= 0.661$ ), the number of institutes involved ( $r$   
23  
24  $=0.076$ ;  $p= 0.602$ ), the number of countries involved ( $r =0.101$ ;  $p= 0.483$ ), and the  
25  
26 number of grants received ( $r= - 0.015$ ;  $p=0.915$ ).

### 33 34 **Level of Evidence**

35  
36  
37 Table 5 summarizes the grading of articles according to the Oxford Center for  
38  
39 evidence-based medicine. The table shows that most articles were graded at levels  
40  
41 1b and 3a and 3b evidence (12 papers had level 1b evidence, 9 papers at level 3a,  
42  
43 and 15 papers had level 3b evidence). Five articles had a level of evidence of 4 and  
44  
45 no article at level 5. The remaining articles were at levels 1a, 2a, 2b and 2c. The  
46  
47 overall agreement between the evaluators was acceptable; Fleiss kappa= 0.8252;  
48  
49 95% CI 0.79-0.85.  
50  
51  
52  
53  
54  
55  
56  
57  
58  
59  
60

1  
2  
3 =====Please Add Table 5 here =====  
4  
5  
6  
7

## 8 9 **DISCUSSION**

10  
11  
12 This study aimed at identifying the characteristics of the top 50 most frequently cited  
13 papers in IBD and assessing the quality of evidence provided. The papers covered a  
14 number of key topics related to IBD including: epidemiology and prevalence,  
15 pathogenesis and genetic susceptibility, animal models, clinical classification and  
16 indices of disease activity, risks of developing colorectal cancer, extra-intestinal  
17 complications, and use of infliximab, adalimumab, monoclonal antibodies and anti-  
18 tumour necrosis factor, and 6- mercaptopurine in CD, and use of 5-aminosalicylic  
19 acid, corticosteroids, and cyclosporine in treating UC. While these topics cover key  
20 issues related to IBD, topics related to molecular biology, surgical management,  
21 patient education, nutritional aspects, radiological and other investigations were not  
22 represented in the top-cited articles list [70,71].  
23  
24  
25  
26  
27  
28  
29  
30  
31  
32  
33  
34  
35  
36  
37

38  
39 The assessment of the characteristics of the top 50 highly cited articles identified in  
40 this study reveals the following:  
41  
42  
43

44 First, the lack of correlations between the number of citations and the number of  
45 years since publication may indicate that the high-citations is not caused by ageing of  
46 these articles. In fact, only 15 articles (30%) were published in the period from 1955  
47 to 1994 (39 years), while the majority, 35 (70%) were published in the last 17 years.  
48  
49  
50

51 No papers were published after 2012. This article also shows that the mean number  
52 of citations of articles published before the year 2000 were much lower than those of  
53  
54  
55  
56  
57  
58  
59  
60

1  
2  
3 articles after the year 2000. This may be related to the tendency of researchers to cite  
4 recently published research and new findings [72] and papers that they have read  
5  
6 [18]. Also the number of citations and the papers' age might be attributed to the  
7  
8 changes in citation behaviour over time. For example, in the 50s and 60s, the authors  
9  
10 used to cite fewer papers compared to what was practiced over the last 20 years [73].  
11  
12 The higher citations have been found to be the strongest predictor of current online  
13  
14 availability after a long time since publication. Therefore, the higher citation could be  
15  
16 a protective mechanism for continued availability of a publication despite aging and  
17  
18 hence continuing citation [74].  
19  
20  
21  
22  
23

24  
25 Second, the lack of a correlation between the number of citations and the Journal  
26  
27 Impact Factor (JIF). The JIF has been widely used in ranking and evaluating journals.  
28  
29 It stands as a proxy for the relative importance of a journal with its field [75]. Although  
30  
31 the top-cited articles identified were published in journals with high impact factors, the  
32  
33 impact factors of some journals were not necessarily the highest in their fields. For  
34  
35 example, *Laboratory Investigation*, *Canadian Journal of Gastroenterology and*  
36  
37 *Hepatology*, *Medicine (Baltimore)*, and *Journal of Immunology* had JIFs in the range  
38  
39 of 1.804 to 4.857. With this information in mind one may postulate that the high JIF is  
40  
41 not necessarily related to the higher citation numbers received. Two recent works  
42  
43 showed that the JIF is not an accurate indicator of citations an average article  
44  
45 receives, articles published in low impact factor journals can still be highly cited and  
46  
47 vice versa [76,77].  
48  
49  
50  
51  
52

53  
54 Third, the study showed negative correlation between the number of citations and the  
55  
56 number of authors, the number of female authors, or the number of institutes. The  
57  
58  
59  
60

1  
2  
3 number of authors and females in authorship varied from one to 106 and from zero to  
4  
5 20, respectively. Also the number of institutes involved varied from one to 88. The  
6  
7 question that can be raised in this regards; are we expecting an increase in number  
8  
9 of citations as the number of authors or the number institutes involved increased?

10  
11  
12 The work of Garcia-Aroca et al [78] shows that collaboration between authors  
13  
14 increases their impact and increases citation rates. However, they showed that  
15  
16 publishing in English in certain journals and collaborating with certain authors and  
17  
18 institutes increase the visibility of the manuscripts published on the subject. Hence it  
19  
20 is the quality of collaboration rather than the absolute number of these parameters.  
21  
22  
23 Recently Tanner-Smith and Polanin showed that studies conducted by more  
24  
25 established authors (have higher h-indices) and reported in more prestigious journal  
26  
27 outlets are more likely to be cited by other scholars, even after controlling for various  
28  
29 proxies of study quality [79].  
30  
31  
32

33  
34 Although the proportion of women in authorship of original research in the United  
35  
36 States in general has significantly increased in the last four decades, women still  
37  
38 compose a minority of the authors of original research [80]. In the field of  
39  
40 gastroenterology, the percentage of the United States female physician authors of  
41  
42 original research in the field has relatively increased over time, yet the senior author  
43  
44 position remains lower than expected [81,82].  
45  
46  
47

48  
49 Fourth, the study showed no correlation between the number of citations and the  
50  
51 number of funds/grants received. This finding is not surprising. Recently it was shown  
52  
53 that too many of the United States authors of most influential papers in science do not  
54  
55 receive NH funding [83]. Another group of researchers found no association between  
56  
57  
58  
59  
60



1  
2  
3 grant percentile ranking and grant outcome as assessed by number of top-10%  
4 articles per dollar million spent [84].  
5  
6  
7

8 The United States, the United Kingdom, Germany, France, Belgium, and Canada  
9 contributed to the majority of these articles. The leadership of universities from these  
10 countries in gastrointestinal research particularly IBD is no surprise, top universities  
11 identified from this study were Massachusetts General Hospital and Harvard Medical  
12 School, Boston, Massachusetts, the United States, Mount Sinai School of Medicine,  
13 New York, the United States, Mayo Clinic, Rochester, Minnesota, the United States,  
14 Cedars-Sinai Medical Center, Los Angeles, California, the United States, University of  
15 Chicago Medical Center, Chicago, Illinois, the United States. Other institutes and  
16 research centres that had lead these studies are shown in Appendix 1.  
17  
18  
19  
20  
21  
22  
23  
24  
25  
26  
27  
28  
29

30 All articles were published in the English language. The most productive journals  
31 were the *New England Journal of Medicine*, and *Gastroenterology* with a total of 24  
32 articles. Others were *Nature*, *Nature Genetics*, *the Lancet*, and *Proceedings of the*  
33 *National Academy of Sciences of the United States of America*, *Cell*, *Gut*, *British*  
34 *Medical Journal*, *Science*, and *Nature Reviews Immunology* making a total of 20  
35 articles. While these journals have a relatively high JIF, other journals published one  
36 article each and had a relatively low JIF compared to journals included in their  
37 categories. For example, *Human Pathology* listed number 22 under the category of  
38 Pathology, and *Canadian Journal of Gastroenterology and Hepatology*, listed number  
39 74 under the category Gastroenterology and Hepatology. The high level of evidence  
40 as outlined in the top-cited articles could be an important contributing factor to the  
41 higher number of citations received by these articles [85].  
42  
43  
44  
45  
46  
47  
48  
49  
50  
51  
52  
53  
54  
55  
56  
57  
58  
59  
60

1  
2  
3 After the submission of our study we came across the study by Connelly et al [86] on  
4 top 100 articles on IBD. While they indicated that their findings covered the period  
5 between 1955-2012 which is consistent with our findings, our study has examined a  
6 range of parameters including correlation of citation numbers with JIF, number of  
7 years since publication, number of authors, females in authorship, institutes, and  
8 number of countries and grants, which were not addressed by Connelly's work. Also  
9 we have examined the level of evidence of highly cited articles.  
10  
11  
12  
13  
14  
15  
16  
17  
18  
19

## 20 **CONCLUSIONS**

21  
22  
23 Our list of top-cited articles in IBD highlights key contributions that based the  
24 foundation of research and examination of different aspects of the disease over 57  
25 years. This scholarly contribution came from universities and research centres in the  
26 United States, the United Kingdom, Germany, France, Belgium and Canada. The  
27 findings may be consistent with the concept that it is not the absolute number of  
28 collaborators that makes an impact on the citation number or the influence of a  
29 publication but rather the quality of such collaboration with regard to the researchers  
30 involved, their institutes, and the ongoing contribution to the advances of research.  
31 The relatively small number of females in the authorship reflects the gender gap and  
32 the fact that women still compose a minority of the authors of original research and  
33 reviews in gastroenterology. The higher level of evidence demonstrated in most top-  
34 cited articles may have contributed to the higher number of citations received by  
35 these articles.  
36  
37  
38  
39  
40  
41  
42  
43  
44  
45  
46  
47  
48  
49  
50  
51  
52  
53  
54  
55  
56  
57  
58  
59  
60

1  
2  
3 **Acknowledgement:** The author would like to thank Diana Sanad for her assistance  
4  
5 and reviewing the manuscript.  
6  
7

8 **Funding support:** This work was funded by the College of Medicine, Research  
9  
10 Center Deanship of Scientific Research, King Saud University, Riyadh, Saudi Arabia.  
11  
12

13 **Ethical approval:** Not applicable to this study.  
14  
15

16 **Contributors** SAA and SA shared equally the different roles and responsibilities to  
17  
18 complete the submitted article including, the research idea, the search of databases,  
19  
20 the evaluation of data collected, the statistical analysis, the interpretation of findings,  
21  
22 the creation of tables and figures, writing the manuscript and the approved the final  
23  
24 version of the manuscript.  
25  
26  
27

28 **Competing interests:** Both authors (SAA and SA) declare that they have no  
29  
30 competing interests and have completed the International Committee of Medical  
31  
32 Journal Editors (ICMJE) form  
33  
34  
35

36 **Provenance and peer review:** Not commissioned; externally peer reviewed  
37  
38

39 **Data sharing statement:** No further data available to share  
40  
41

---

## REFERENCES

1. MacMaster FP, Swansburg R, Rittenbach K. Academic Productivity in Psychiatry: Benchmarks for the H-Index. *Acad Psychiatry*. 2017 Apr 18. [Epub ahead of print]
2. Susarla HK, Dhar V, Karimbux NY, Tinanoff N. Do Standard Bibliometric Measures Correlate with Academic Rank of Full-Time Pediatric Dentistry Faculty Members? *J Dent Educ*. 2017 Apr;81(4):427-432.
3. Milone MT, Bernstein J. On Track to Professorship? A Bibliometric Analysis of Early Scholarly Output. *Am J Orthop (Belle Mead NJ)*. 2016 Mar-Apr;45(3):E119-23.
4. Azer SA, Holen A, Wilson I, Skokauskas N. Impact factor of medical education journals and recently developed indices: Can any of them support academic promotion criteria? *J Postgrad Med*. 2016 Jan-Mar;62(1):32-39. doi: 10.4103/0022-3859.173202.
5. Jones AW. Impact of JAT publications 1981-2003: the most prolific authors and the most highly cited articles. *J Anal Toxicol*. 2004 Oct;28(7):541-545.
6. Patsopoulos NA, Ioannidis JP, Analatos AA. Origin and funding of the most frequently cited papers in medicine: database analysis. *BMJ* 2006;332:1061–1064.
7. Garfield E. Fortnightly review: how can impact factors be improved? *BMJ* 1996;313:411–413.
8. Azer SA. Exploring the Top-Cited and Most Influential Articles in Medical Education. *J Contin Educ Health Prof*. 2016 Summer;36 Suppl 1:S32-41.
9. Wilks S. Morbid appearances in the intestines of Miss Bankes. *Med Times Gazette* 1859;2:264-265.
10. Crohn BB, Ginzburg L, Oppenheimer GD. Regional ileitis: a pathologic and clinical entity. *JAMA* 1932;99:1323-1329.
11. Van Noorden R, Maher B, Nuzzo R. The top 100 papers. *Nature*. 2014;514(7524):550.

- 1  
2  
3  
4 12. Kulkarni AV, Aziz B, Shams I, Busse JW. Comparisons of citations in Web of  
5 Science, Scopus, and Google Scholar for articles published in general medical  
6 journals. *JAMA*. 2009 Sep 9;302(10):1092-1096.  
7
- 8 13. Powell AGMT, Bevan V, Brown C, Lewis WG. Altmetric Versus Bibliometric  
9 Perspective Regarding Publication Impact and Force. *World J Surg*. 2018 Mar 13.  
10  
11  
12
- 13 14. Yi F, Ma J, Ni W, Chang R, Liu W, Han X, Pan D, Liu X, Qiu J. The top  
14 cited articles on glioma stem cells in Web of Science. *Neural Regen Res*. 2013 May  
15 25;8(15):1431-8. doi: 10.3969/j.issn.1673-5374.2013.15.011.  
16
- 17 15. Mu Y, Li N, Guan L, Wang C, Shang S, Wang Y. Therapies for children with  
18 cerebral palsy: A Web of Science-based literature analysis. *Neural Regen Res*. 2012  
19 Nov 25;7(33):2632-9. doi: 10.3969/j.issn.1673-5374.2012.33.009.  
20  
21
- 22 16. Azer SA. Top-Cited Articles in Problem-Based Learning: A Bibliometric Analysis  
23 and Quality of Evidence Assessment. *J Dent Educ*. 2017 Apr;81(4):458-478.  
24  
25
- 26 17. Oxford Centre for Evidence-based Medicine – Levels of Evidence (March 2009).  
27 Available at: [http://www.cebm.net/oxford-centre-evidence-based-medicine-levels-](http://www.cebm.net/oxford-centre-evidence-based-medicine-levels-evidence-march-2009)  
28 [evidence-march-2009](http://www.cebm.net/oxford-centre-evidence-based-medicine-levels-evidence-march-2009) [Accessed 20 May 2017].  
29  
30
- 31 18. Azer SA. The top-cited articles in medical education: a bibliometric analysis. *Acad*  
32 *Med* 2015;90(8):1147-1161.  
33  
34  
35
- 36 19. D'Antiga L, Betalli P, De Angelis P, et al. Interobserver agreement on endoscopic  
37 classification of oesophageal varices in children. *J Pediatr Gastroenterol Nutr*  
38 2015;61(2):176-181.  
39  
40
- 41 20. Hugot JP, Chamaillard M, Zouali H, Lesage S, Cézard JP, Belaiche J, Almer S,  
42 Tysk C, O'Morain CA, Gassull M, Binder V, Finkel Y, Cortot A, Modigliani R, Laurent-  
43 Puig P, Gower-Rousseau C, Macry J, Colombel JF, Sahbatou M, Thomas G.  
44 Association of NOD2 leucine-rich repeat variants with susceptibility to Crohn's  
45 disease. *Nature*. 2001 May 31;411(6837):599-603.  
46  
47
- 48 21. Ogura Y, Bonen DK, Inohara N, Nicolae DL, Chen FF, Ramos R, Britton H, Moran  
49 T, Karaliuskas R, Duerr RH, Achkar JP, Brant SR, Bayless TM, Kirschner BS,  
50 Hanauer SB, Nuñez G, Cho JH. A frameshift mutation in NOD2 associated with  
51 susceptibility to Crohn's disease. *Nature*. 2001 May 31;411(6837):603-6.  
52  
53
- 54 22. Kühn R, Löhler J, Rennick D, Rajewsky K, Müller W. Interleukin-10-deficient mice  
55 develop chronic enterocolitis. *Cell*. 1993 Oct 22;75(2):263-74  
56  
57  
58  
59  
60

- 1  
2  
3 23. Best WR, Becktel JM, Singleton JW, Kern F Jr. Development of a Crohn's  
4 disease activity index. National Cooperative Crohn's Disease Study.  
5 Gastroenterology. 1976 Mar;70(3):439-44.  
6  
7  
8 24. Hanauer SB, Feagan BG, Lichtenstein GR, Mayer LF, Schreiber S, Colombel JF,  
9 Rachmilewitz D, Wolf DC, Olson A, Bao W, Rutgeerts P; ACCENT I Study Group.  
10 Maintenance infliximab for Crohn's disease: the ACCENT I randomised trial. Lancet.  
11 2002 May 4;359(9317):1541-1549.  
12  
13 25. Podolsky DK. Inflammatory bowel disease. N Engl J Med. 2002 Aug  
14 8;347(6):417-429.  
15  
16  
17 26. Targan SR, Hanauer SB, van Deventer SJ, Mayer L, Present DH, Braakman T,  
18 DeWoody KL, Schaible TF, Rutgeerts PJ. A short-term study of chimeric monoclonal  
19 antibody cA2 to tumor necrosis factor alpha for Crohn's disease. Crohn's Disease  
20 cA2 Study Group. N Engl J Med. 1997 Oct 9;337(15):1029-35.  
21  
22  
23  
24 27. Xavier RJ, Podolsky DK. Unravelling the pathogenesis of inflammatory bowel  
25 disease. Nature. 2007 Jul 26;448(7152):427-434.  
26  
27  
28 28. Truelove SC and Witts LJ. Cortisone in ulcerative colitis; final report on a  
29 therapeutic trial. Br Med J. 1955 Oct 29;2(4947):1041-1048.  
30  
31  
32 29. Duerr RH, Taylor KD, Brant SR, Rioux JD, Silverberg MS, Daly MJ, Steinhart AH,  
33 Abraham C, Regueiro M, Griffiths A, Dassopoulos T, Bitton A, Yang H, Targan S,  
34 Datta LW, Kistner EO, Schumm LP, Lee AT, Gregersen PK, Barmada MM, Rotter JI,  
35 Nicolae DL, Cho JH. A genome-wide association study identifies IL23R as an  
36 inflammatory bowel disease gene. Science. 2006 Dec 1;314(5804):1461-1463.  
37  
38  
39 30. Rutgeerts P, Sandborn WJ, Feagan BG, Reinisch W, Olson A, Johanns J,  
40 Travers S, Rachmilewitz D, Hanauer SB, Lichtenstein GR, de Villiers WJ, Present D,  
41 Sands BE, Colombel JF. Infliximab for induction and maintenance therapy for  
42 ulcerative colitis. N Engl J Med. 2005 Dec 8;353(23):2462-76.  
43  
44  
45 31. Present DH, Rutgeerts P, Targan S, Hanauer SB, Mayer L, van Hogezaand RA,  
46 Podolsky DK, Sands BE, Braakman T, DeWoody KL, Schaible TF, van Deventer SJ.  
47 Infliximab for the treatment of fistulas in patients with Crohn's disease. N Engl J Med.  
48 1999 May 6;340(18):1398-405.  
49  
50  
51 32. Frank DN, St Amand AL, Feldman RA, Boedeker EC, Harpaz N, Pace NR.  
52 Molecular-phylogenetic characterization of microbial community imbalances in human  
53 inflammatory bowel diseases. Proc Natl Acad Sci U S A. 2007 Aug  
54 21;104(34):13780-13785  
55  
56 33. Jostins L, Ripke S, Weersma RK, Duerr RH, McGovern DP, Hui KY, Lee JC,

1  
2  
3 Schumm LP, Sharma Y, Anderson CA, Essers J, Mitrovic M, Ning K, Cleynen I,  
4 Theatre E, Spain SL, Raychaudhuri S, Goyette P, Wei Z, Abraham C, Achkar JP,  
5 Ahmad T, Amininejad L, Ananthakrishnan AN, Andersen V, Andrews JM, Baidoo L,  
6 Balschun T, Bampton PA, Bitton A, Boucher G, Brand S, Büning C, Cohain A, Cichon  
7 S, D'Amato M, De Jong D, Devaney KL, Dubinsky M, Edwards C, Ellinghaus D,  
8 Ferguson LR, Franchimont D, Fransen K, Garry R, Georges M, Gieger C, Glas J,  
9 Ferguson LR, Franchimont D, Fransen K, Garry R, Georges M, Gieger C, Glas J,  
10 Haritunians T, Hart A, Hawkey C, Hedl M, Hu X, Karlsen TH, Kupcinskas L,  
11 Kugathasan S, Latiano A, Laukens D, Lawrance IC, Lees CW, Louis E, Mahy G,  
12 Mansfield J, Morgan AR, Mowat C, Newman W, Palmieri O, Ponsioen CY, Potocnik  
13 U, Prescott NJ, Regueiro M, Rotter JI, Russell RK, Sanderson JD, Sans M, Satsangi  
14 J, Schreiber S, Simms LA, Sventoraityte J, Targan SR, Taylor KD, Tremelling M,  
15 Verspaget HW, De Vos M, Wijmenga C, Wilson DC, Winkelmann J, Xavier RJ,  
16 Zeissig S, Zhang B, Zhang CK, Zhao H; International IBD Genetics Consortium  
17 (IIBDGC)., Silverberg MS, Annese V, Hakonarson H, Brant SR, Radford-Smith G,  
18 Mathew CG, Rioux JD, Schadt EE, Daly MJ, Franke A, Parkes M, Vermeire S, Barrett  
19 JC, Cho JH. Host-microbe interactions have shaped the genetic architecture of  
20 inflammatory bowel disease. *Nature*. 2012 Nov 1;491(7422):119-24.  
21  
22

23  
24 34. Barrett JC, Hansoul S, Nicolae DL, Cho JH, Duerr RH, Rioux JD, Brant SR,  
25 Silverberg MS, Taylor KD, Barmada MM, Bitton A, Dassopoulos T, Datta LW, Green  
26 T, Griffiths AM, Kistner EO, Murtha MT, Regueiro MD, Rotter JI, Schumm LP,  
27 Steinhart AH, Targan SR, Xavier RJ; NIDDK IBD Genetics Consortium, Libioulle C,  
28 Sandor C, Lathrop M, Belaiche J, Dewit O, Gut I, Heath S, Laukens D, Mni M,  
29 Rutgeerts P, Van Gossum A, Zelenika D, Franchimont D, Hugot JP, de Vos M,  
30 Vermeire S, Louis E; Belgian-French IBD Consortium; Wellcome Trust Case Control  
31 Consortium, Cardon LR, Anderson CA, Drummond H, Nimmo E, Ahmad T, Prescott  
32 NJ, Onnie CM, Fisher SA, Marchini J, Ghorji J, Bumpstead S, Gwilliam R, Tremelling  
33 M, Deloukas P, Mansfield J, Jewell D, Satsangi J, Mathew CG, Parkes M, Georges  
34 M, Daly MJ. Genome-wide association defines more than 30 distinct susceptibility loci  
35 for Crohn's disease. *Nat Genet*. 2008 Aug;40(8):955-962.  
36  
37

38  
39 35. Loftus EV Jr. Clinical epidemiology of inflammatory bowel disease: Incidence,  
40 prevalence, and environmental influences. *Gastroenterology*. 2004 May;126(6):1504-  
41 1517.  
42

43 36. Fiocchi C. Inflammatory bowel disease: etiology and pathogenesis.  
44 *Gastroenterology*. 1998 Jul;115(1):182-205.  
45

46  
47 37. Harvey RF, Bradshaw JM. A simple index of Crohn's-disease activity. *Lancet*.  
48 1980 Mar 8;1(8167):514.  
49

50 38. Molodecky NA, Soon IS, Rabi DM, Ghali WA, Ferris M, Chernoff G, Benchimol EI,  
51 Panaccione R, Ghosh S, Barkema HW, Kaplan GG. Increasing incidence and  
52 prevalence of the inflammatory bowel diseases with time, based on systematic  
53 review. *Gastroenterology*. 2012 Jan;142(1):46-54.  
54  
55  
56  
57  
58  
59  
60



1  
2  
3 39. Riddell RH, Goldman H, Ransohoff DF, Appelman HD, Fenoglio CM, Haggitt RC,  
4 Ahren C, Correa P, Hamilton SR, Morson BC, et al. Dysplasia in inflammatory bowel  
5 disease: standardized classification with provisional clinical applications. *Hum Pathol*.  
6 1983 Nov;14(11):931-968.  
7

8  
9  
10 40. Okayasu I, Hatakeyama S, Yamada M, Ohkusa T, Inagaki Y, Nakaya R A novel  
11 method in the induction of reliable experimental acute and chronic ulcerative colitis in  
12 mice. *Gastroenterology*. 1990 Mar;98(3):694-702.  
13

14  
15  
16 41. Eaden JA, Abrams KR, Mayberry JF. The risk of colorectal cancer in ulcerative  
17 colitis: a meta-analysis. *Gut*. 2001 Apr;48(4):526-535.  
18

19  
20 42. Sokol H, Pigneur B, Watterlot L, Lakhdari O, Bermúdez-Humarán LG, Gratadoux  
21 JJ, Blugeon S, Bridonneau C, Furet JP, Corthier G, Grangette C, Vasquez N, Pochart  
22 P, Trugnan G, Thomas G, Blottière HM, Doré J, Marteau P, Seksik P, Langella P.  
23 *Faecalibacterium prausnitzii* is an anti-inflammatory commensal bacterium identified  
24 by gut microbiota analysis of Crohn disease patients. *Proc Natl Acad Sci U S A*. 2008  
25 Oct 28;105(43):16731-16736.  
26

27  
28 43. Silverberg MS, Satsangi J, Ahmad T, Arnott ID, Bernstein CN, Brant SR, Caprilli  
29 R, Colombel JF, Gasche C, Geboes K, Jewell DP, Karban A, Loftus EV Jr, Peña AS,  
30 Riddell RH, Sachar DB, Schreiber S, Steinhart AH, Targan SR, Vermeire S, Warren  
31 BF. Toward an integrated clinical, molecular and serological classification of  
32 inflammatory bowel disease: report of a Working Party of the 2005 Montreal World  
33 Congress of Gastroenterology. *Can J Gastroenterol*. 2005 Sep;19 Suppl A:5A-36A  
34

35  
36 44. Sadlack B, Merz H, Schorle H, Schimpl A, Feller AC, Horak I. Ulcerative colitis-  
37 like disease in mice with a disrupted interleukin-2 gene. *Cell*. 1993 Oct 22;75(2):253-  
38 261.  
39

40  
41 45. Franke A, McGovern DP, Barrett JC, Wang K, Radford-Smith GL, Ahmad T, Lees  
42 CW, Balschun T, Lee J, Roberts R, Anderson CA, Bis JC, Bumpstead S, Ellinghaus  
43 D, Festen EM, Georges M, Green T, Haritunians T, Jostins L, Latiano A, Mathew CG,  
44 Montgomery GW, Prescott NJ, Raychaudhuri S, Rotter JI, Schumm P, Sharma Y,  
45 Simms LA, Taylor KD, Whiteman D, Wijmenga C, Baldassano RN, Barclay M,  
46 Bayless TM, Brand S, Büning C, Cohen A, Colombel JF, Cottone M, Stronati L,  
47 Denson T, De Vos M, D'Inca R, Dubinsky M, Edwards C, Florin T, Franchimont D,  
48 Geary R, Glas J, Van Gossom A, Guthery SL, Halfvarson J, Verspaget HW, Hugot  
49 JP, Karban A, Laukens D, Lawrance I, Lemann M, Levine A, Libioulle C, Louis E,  
50 Mowat C, Newman W, Panés J, Phillips A, Proctor DD, Regueiro M, Russell R,  
51 Rutgeerts P, Sanderson J, Sans M, Seibold F, Steinhart AH, Stokkers PC, Torkvist L,  
52 Kullak-Ublick G, Wilson D, Walters T, Targan SR, Brant SR, Rioux JD, D'Amato M,  
53 Weersma RK, Kugathasan S, Griffiths AM, Mansfield JC, Vermeire S, Duerr RH,  
54 Silverberg MS, Satsangi J, Schreiber S, Cho JH, Annese V, Hakonarson H, Daly MJ,  
55 Parkes M. Genome-wide meta-analysis increases to 71 the number of confirmed  
56  
57  
58  
59  
60



1  
2  
3 Crohn's disease susceptibility loci. *Nat Genet.* 2010 Dec;42(12):1118-1125.  
4

5  
6 46. Baert F, Noman M, Vermeire S, Van Assche G, D' Haens G, Carbonez A,  
7 Rutgeerts P. Influence of immunogenicity on the long-term efficacy of infliximab in  
8 Crohn's disease. *N Engl J Med.* 2003 Feb 13;348(7):601-608.  
9

10  
11 47. Colombel JF, Sandborn WJ, Reinisch W, Mantzaris GJ, Kornbluth A,  
12 Rachmilewitz D, Lichtiger S, D'Haens G, Diamond RH, Broussard DL, Tang KL, van  
13 der Woude CJ, Rutgeerts P; SONIC Study Group. Infliximab, azathioprine, or  
14 combination therapy for Crohn's disease. *N Engl J Med.* 2010 Apr 15;362(15):1383-  
15 1395.  
16

17  
18 48. Cooper HS, Murthy SN, Shah RS, Sedergran DJ. Clinicopathologic study of  
19 dextran sulfate sodium experimental murine colitis. *Lab Invest.* 1993 Aug;69(2):238-  
20 249.  
21

22  
23 49. Ekobom A, Helmick C, Zack M, Adami HO. Ulcerative colitis and colorectal cancer.  
24 A population-based study. *N Engl J Med.* 1990 Nov 1;323(18):1228-1233.  
25

26  
27 50. Schroeder KW, Tremaine WJ, Ilstrup DM. Coated oral 5-aminosalicylic acid  
28 therapy for mildly to moderately active ulcerative colitis. A randomized study. *N Engl J*  
29 *Med.* 1987 Dec 24;317(26):1625-1629.  
30

31  
32 51. Rioux JD, Xavier RJ, Taylor KD, Silverberg MS, Goyette P, Huett A, Green T,  
33 Kuballa P, Barmada MM, Datta LW, Shugart YY, Griffiths AM, Targan SR, Ippoliti AF,  
34 Bernard EJ, Mei L, Nicolae DL, Regueiro M, Schumm LP, Steinhart AH, Rotter JI,  
35 Duerr RH, Cho JH, Daly MJ, Brant SR. Genome-wide association study identifies  
36 new susceptibility loci for Crohn disease and implicates autophagy in disease  
37 pathogenesis. *Nat Genet.* 2007 May;39(5):596-604.  
38

39  
40 52. Sands BE, Anderson FH, Bernstein CN, Chey WY, Feagan BG, Fedorak RN,  
41 Kamm MA, Korzenik JR, Lashner BA, Onken JE, Rachmilewitz D, Rutgeerts P, Wild  
42 G, Wolf DC, Marsters PA, Travers SB, Blank MA, van Deventer SJ. Infliximab  
43 maintenance therapy for fistulizing Crohn's disease. *N Engl J Med.* 2004 Feb  
44 26;350(9):876-85.  
45

46  
47 53. Colombel JF, Sandborn WJ, Rutgeerts P, Enns R, Hanauer SB, Panaccione R,  
48 Schreiber S, Byczkowski D, Li J, Kent JD, Pollack PF. Adalimumab for maintenance  
49 of clinical response and remission in patients with Crohn's disease: the CHARM trial.  
50 *Gastroenterology.* 2007 Jan;132(1):52-65.  
51

52  
53 54. Hampe J, Franke A, Rosenstiel P, Till A, Teuber M, Huse K, Albrecht M, Mayr G,  
54 De La Vega FM, Briggs J, Günther S, Prescott NJ, Onnie CM, Häsler R, Sipos B,  
55 Fölsch UR, Lengauer T, Platzer M, Mathew CG, Krawczak M, Schreiber S. A  
56 genome-wide association scan of nonsynonymous SNPs identifies a susceptibility  
57 variant for Crohn disease in ATG16L1. *Nat Genet.* 2007 Feb;39(2):207-211.  
58  
59  
60

- 1  
2  
3  
4 55. Bouma G, Strober W. The immunological and genetic basis of inflammatory  
5 bowel disease. *Nat Rev Immunol*. 2003 Jul;3(7):521-533.  
6  
7  
8 56. Lichtiger S, Present DH, Kornbluth A, Gelernt I, Bauer J, Galler G, Michelassi F,  
9 Hanauer S. Cyclosporine in severe ulcerative colitis refractory to steroid therapy. *N*  
10 *Engl J Med*. 1994 Jun 30;330(26):1841-1845.  
11  
12 57. Abraham C, Cho JH. Inflammatory bowel disease. *N Engl J Med*. 2009 Nov  
13 19;361(21):2066-2078.  
14  
15  
16  
17 58. Summers RW, Switz DM, Sessions JT Jr, Bechtel JM, Best WR, Kern F Jr,  
18 Singleton JW. National Cooperative Crohn's Disease Study: results of drug treatment.  
19 *Gastroenterology*. 1979 Oct;77(4 Pt 2):847-869  
20  
21  
22  
23 59. Satsangi J, Silverberg MS, Vermeire S, Colombel JF. The Montreal classification  
24 of inflammatory bowel disease: controversies, consensus, and implications.  
25 *Gut*. 2006 Jun;55(6):749-53.  
26  
27  
28  
29 60. Elson CO, Sartor RB, Tennyson GS, Riddell RH. Experimental models of  
30 inflammatory bowel disease. *Gastroenterology*. 1995 Oct;109(4):1344-1367.  
31  
32  
33 61. Greenstein AJ, Janowitz HD, Sachar DB. The extra-intestinal complications of  
34 Crohn's disease and ulcerative colitis: a study of 700 patients. *Medicine (Baltimore)*.  
35 1976 Sep;55(5):401-412.  
36  
37 62. Fujino S, Andoh A, Bamba S, Ogawa A, Hata K, Araki Y, Bamba T, Fujiyama Y.  
38 Increased expression of interleukin 17 in inflammatory bowel disease. *Gut*. 2003  
39 Jan;52(1):65-70.  
40  
41  
42 63. Sartor RB. Microbial influences in inflammatory bowel diseases.  
43 *Gastroenterology*. 2008 Feb;134(2):577-594.  
44  
45  
46  
47 64. Manichanh C, Rigottier-Gois L, Bonnaud E, Gloux K, Pelletier E, Frangeul L,  
48 Nalin R, Jarrin C, Chardon P, Marteau P, Roca J, Dore J.  
49 Reduced diversity of faecal microbiota in Crohn's disease revealed by a  
50 metagenomic approach. *Gut*. 2006 Feb;55(2):205-211.  
51  
52  
53 65. Fuss IJ, Neurath M, Boirivant M, Klein JS, de la Motte C, Strong SA, Fiocchi C,  
54 Strober W. Disparate CD4+ lamina propria (LP) lymphokine secretion profiles in  
55 inflammatory bowel disease. Crohn's disease LP cells manifest increased secretion  
56 of IFN-gamma, whereas ulcerative colitis LP cells manifest increased secretion of IL-  
57  
58  
59  
60

1  
2  
3 5. J Immunol. 1996 Aug 1;157(3):1261-1270.  
4  
5

6  
7 66. Rutgeerts P, Geboes K, Vantrappen G, Beyls J, Kerremans R, Hiele M.  
8 Predictability of the postoperative course of Crohn's disease.  
9 Gastroenterology. 1990 Oct;99(4):956-963.  
10

11  
12 67. Present DH, Korelitz BI, Wisch N, Glass JL, Sachar DB, Pasternack BS.  
13 Treatment of Crohn's disease with 6-mercaptopurine. A long-term, randomized,  
14 double-blind study. N Engl J Med. 1980 May 1;302(18):981-987.  
15  
16

17  
18 68. Swidsinski A, Ladhoff A, Pernthaler A, Swidsinski S, Loening-Baucke V, Ortner M,  
19 Weber J, Hoffmann U, Schreiber S, Dietel M, Lochs H. Mucosal flora in inflammatory  
20 bowel disease. Gastroenterology. 2002 Jan;122(1):44-54.  
21

22  
23 69. van Dullemen HM, van Deventer SJ, Hommes DW, Bijl HA, Jansen J, Tytgat GN,  
24 Woody J. Treatment of Crohn's disease with anti-tumor necrosis factor chimeric  
25 monoclonal antibody (cA2). Gastroenterology. 1995 Jul;109(1):129-135.  
26  
27

28  
29 70. Azer SA. Overview of molecular pathways in inflammatory bowel disease  
30 associated with colorectal cancer development. Eur J Gastroenterol Hepatol. 2013  
31 Mar;25(3):271-281.  
32

33  
34 71. Azer SA, AIOlayan TI, AIGhamdi MA, AISanea MA. Inflammatory bowel disease:  
35 An evaluation of health information on the internet. World J Gastroenterol. 2017 Mar  
36 7;23(9):1676-1696.  
37

38  
39 72. Börner K, Maru JT, Goldstone RL. The simultaneous evolution of author and  
40 paper networks. Proc Natl Acad Sci U S A. 2004 Apr 6;101 Suppl 1:5266-73.  
41  
42

43  
44 73 Sinatra R, Deville P, Szell M, Wang D, Barabasi AL. A century of  
45 physics. Nature Physics 2015; 11(10): 791-796.  
46  
47

48  
49 74. Wren JD, Georgescu C, Giles CB, Hennessey J. Use it or lose it: citations predict  
50 the continued online availability of published bioinformatics resources. Nucleic Acids  
51 Res. 2017 Apr 20;45(7):3627-3633.  
52  
53

54  
55 75. Shanahan DR. Auto-correlation of journal impact factor for consensus research  
56 reporting statements: a cohort study. PeerJ. 2016 Mar 31;4:e1887.  
57  
58  
59  
60

- 1  
2  
3  
4 76. Royle P, Kandala NB, Barnard K, Waugh N. Bibliometrics of systematic reviews: analysis of citation rates and journal impact factors. *Syst Rev*. 2013 Sep 12;2:74.  
5  
6  
7  
8 77. Falagas ME, Kouranos VD, Michalopoulos A, Rodopoulou SP, Batsiou  
9 MA, Karageorgopoulos DE. Comparison of the distribution of citations received by  
10 articles published in high, moderate, and low impact factor journals in clinical  
11 medicine. *Intern Med J*. 2010 Aug;40(8):587-591.  
12  
13 78. García-Aroca MÁ, Pandiella-Dominique A, Navarro-Suay R, Alonso-Arroyo  
14 A, Granda-Orive JI, Anguita-Rodríguez F, López-García A. Analysis of Production,  
15 Impact, and Scientific Collaboration on Difficult Airway Through the Web of Science  
16 and Scopus (1981-2013). *Anesth Analg*. 2017 Jun;124(6):1886-1896.  
17  
18 79. Tanner-Smith EE, Polanin JR. Brief alcohol intervention trials conducted by higher  
19 prestige authors and published in higher impact factor journals are cited more  
20 frequently. *J Clin Epidemiol*. 2016 Feb 6.  
21  
22  
23 80. Jagsi R, Guancial EA, Worobey CC, Henault LE, Chang Y, Starr R, Tarbell  
24 NJ, Hylek EM. The "gender gap" in authorship of academic medical literature--a 35-  
25 year perspective. *N Engl J Med*. 2006 Jul 20;355(3):281-287.  
26  
27  
28 81. Long MT, Leszczynski A, Thompson KD, Wasan SK, Calderwood AH. Female  
29 authorship in major academic gastroenterology journals: a look over 20 years.  
30 *Gastrointest Endosc*. 2015;81(6):1440-1447.  
31  
32  
33 82. Diamond SJ, Thomas CR Jr, Desai S, Holliday EB, Jagsi R, Schmitt C, Enestvedt  
34 BK. Gender Differences in Publication Productivity, Academic Rank, and Career  
35 Duration Among U.S. Academic Gastroenterology Faculty. *Acad*  
36 *Med*. 2016 Aug;91(8):1158-1163.  
37  
38  
39 83. Nicholson JM, Ioannidis JP. Research grants: Conform and be funded. *Nature*.  
40 2012 Dec 6;492(7427):34-36.  
41  
42 84. Lauer MS, Danthi NS, Kaltman J, Wu C. Predicting Productivity Returns on  
43 Investment: Thirty Years of Peer Review, Grant Funding, and Publication of Highly  
44 Cited Papers at the National Heart, Lung, and Blood Institute. *Circ Res*. 2015 Jul  
45 17;117(3):239-243.  
46  
47  
48  
49 85. Cheng K, Dodson TB, Egbert MA, Susarla SM. Which Factors Affect Citation  
50 Rates in the Oral and Maxillofacial Surgery Literature? *J Oral Maxillofac*  
51 *Surg*. 2017 Apr 1. pii: S0278-2391(17)30361-0.  
52  
53  
54  
55  
56  
57  
58  
59  
60

1  
2  
3  
4  
5  
6  
7  
8  
9  
10  
11  
12  
13  
14  
15  
16  
17  
18  
19  
20  
21  
22  
23  
24  
25  
26  
27  
28  
29  
30  
31  
32  
33  
34  
35  
36  
37  
38  
39  
40  
41  
42  
43  
44  
45  
46  
47  
48  
49  
50  
51  
52  
53  
54  
55  
56  
57  
58  
59  
60

86. Connelly TM, Devane L, Kelly JC, Wrafter P, Messaris E. The 100 classic papers in ulcerative colitis: a bibliometric analysis. *Expert Rev Gastroenterol Hepatol.* 2016 Aug 22:1-9. [Epub ahead of print]

For peer review only

## Glossary

**Articles** are scientific written composition representing a substantial advance in the understanding of a topic or problem. They raise questions, provide thoughtful, critical analysis and aim at establishing new directions.

**Basic research** is defined as fundamental research, which aims at improving scientific theories and our understanding of a phenomenon. Basic research may use animal models and include in vivo and in-vitro studies that target advances of fundamental knowledge.

**Clinical research** is defined as research applied to a clinical condition/disease with the aim to test an intervention or make a change to a phenomenon. Basic research usually fuels clinical research.

**Reports** are defined as brief articles with conclusions, results, and recommendations. They report on a substantial advance in an area/topic or a problem and aim at reporting findings and standardization of practice.

**Review and meta-analysis** are defined as an article reviewing the progress of knowledge in a particular topic, critically analysing the current status of knowledge and presenting an understanding of the subject by discussing related literature. A review should identify gaps in the literature and highlight future directions for further research. **A meta-analysis** is defined as a statistical analysis that combines the results from different scientific studies to provide conclusive evidence.

1  
2  
3 **Figure Legend**  
4

5 **Figure 1A:** Number of citations of papers published before the year 2000 (mean±SD)  
6

7 **Figure 1B:** Number of citations of papers published after the year 2000 (mean±SD)  
8  
9  
10  
11  
12  
13  
14  
15  
16  
17  
18  
19  
20  
21  
22  
23  
24  
25  
26  
27  
28  
29  
30  
31  
32  
33  
34  
35  
36  
37  
38  
39  
40  
41  
42  
43  
44  
45  
46  
47  
48  
49  
50  
51  
52  
53  
54  
55  
56  
57  
58  
59  
60

For peer review only

**Table 1** Top cited papers in inflammatory bowel disease identified by searching the Web of Science, summarized by year of publication and category

| Article type             | Year of publication: no of articles [References] |           |           |              |                             |                                    |                                    |           |
|--------------------------|--------------------------------------------------|-----------|-----------|--------------|-----------------------------|------------------------------------|------------------------------------|-----------|
|                          | 1950-1958                                        | 1959-1967 | 1968-1976 | 1977-1985    | 1986-1994                   | 1995-2003                          | 2004-2012                          | Total (%) |
| Article                  |                                                  |           |           | 1 [39]       |                             |                                    |                                    | 1 [2%]    |
| Review/<br>Meta-analysis |                                                  |           | 1 [61]    |              |                             | 5 [25,36,41,55,60]                 | 8 [27,34,35,45,33,57,38,63]        | 14 [28%]  |
| Report                   |                                                  |           |           |              |                             |                                    | 2 [43,59]                          | 2 [4%]    |
| Research                 | 1 [28]                                           |           | 1 [23]    | 3 [37,58,67] | 8 [22,44,40,48,49,56,50,66] | 10 [20,21,26,24,31,46,62,69,65,68] | 10 [29,30,32,51,52,42,54,47,53,64] | 33 [66%]  |
| Total (%)                | 1 [2%]                                           | 0 [0%]    | 2 [4%]    | 4 [8%]       | 8 [16%]                     | 15 [30%]                           | 20 [40%]                           | 50 [100%] |



**Table 2** Top-cited papers in inflammatory bowel disease (IBD) identified by searching the Web of Science, summarized by category and topic

| Topics on IBD                               | Category: no of articles [References] |                          |           |                             | Total (%) |
|---------------------------------------------|---------------------------------------|--------------------------|-----------|-----------------------------|-----------|
|                                             | Article                               | Review/<br>Meta-analysis | Report    | Research                    |           |
| Epidemiology, prevalence                    |                                       | 2 [35,38]                |           |                             | 2 [4%]    |
| CD genetic susceptibility and NOD2 mutation |                                       | 2 [34,45]                |           | 4 [20,21,51,54]             | 6 [12%]   |
| Animal models for IBD                       |                                       | 1 [60]                   |           | 4 [22,44,40,48]             | 5 [10%]   |
| Pathogenesis of IBD                         |                                       | 7 [25,27,36,55,33,57,63] |           | 8 [29,32,42,62,65,68,66,64] | 15 [30%]  |
| Classification, index of disease activity   | 1 [39]                                |                          | 2 [43,59] | 2 [23,37]                   | 5 [10%]   |
| Risk of developing colorectal cancer        |                                       | 1 [41]                   |           | 1 [49]                      | 2 [4%]    |
| Extra-intestinal complications              |                                       | 1 [61]                   |           |                             | 1 [2%]    |
| Infliximab in CD                            |                                       |                          |           | 6 [24,31,30,46,52,47]       | 6 [12%]   |
| Corticosteroids in UC                       |                                       |                          |           | 1 [28]                      | 1 [2%]    |
| Drug treatment and cyclosporine in UC       |                                       |                          |           | 2 [56,58]                   | 2 [4%]    |
| Adalimumab in CD                            |                                       |                          |           | 1 [53]                      | 1 [2%]    |
| 5-aminosalicylic acid in                    |                                       |                          |           | 1 [50]                      | 1 [2%]    |

|                                                               |        |          |        |           |           |
|---------------------------------------------------------------|--------|----------|--------|-----------|-----------|
| UC                                                            |        |          |        |           |           |
| 6-mercaptopurine in CD                                        |        |          |        | 1 [67]    | 1 [2%]    |
| Monoclonal antibodies,<br>anti-tumor necrosis<br>factor in CD |        |          |        | 2 [26,69] | 2 [4%]    |
| Total (%)                                                     | 1 [2%] | 14 [28%] | 2 [4%] | 33 [66%]  | 50 [100%] |

For peer review only

1  
2  
3  
4  
5  
6  
7  
8  
9  
10  
11  
12  
13  
14  
15  
16  
17  
18  
19  
20  
21  
22  
23  
24  
25  
26  
27  
28  
29  
30  
31  
32  
33  
34  
35  
36  
37  
38  
39  
40  
41  
42  
43  
44  
45  
46  
47

**Table 3.** The journals that published the top-cited inflammatory bowel disease (IBD) articles included in the study, the journal impact factor, and the number of papers published and reference number.

| Journal*                                                                               | 2016-Journal Impact Factor (JIF) | Number of papers published [References]  |
|----------------------------------------------------------------------------------------|----------------------------------|------------------------------------------|
| <i>New England Journal of Medicine</i>                                                 | 72.406                           | 12 [25,26,31,30,46,49,56,52,47,50,67,57] |
| <i>Gastroenterology</i>                                                                | 18.392                           | 12 [23,36,35,40,58,60,53,69,38,68,63,66] |
| <i>Nature</i>                                                                          | 40.137                           | 4 [20,21,27,33]                          |
| <i>Nature Genetics</i>                                                                 | 27.959                           | 4 [34,51,45,54]                          |
| <i>The Lancet</i>                                                                      | 47.831                           | 2 [24,37]                                |
| <i>Proceedings of the National Academy of Sciences of the United States of America</i> | 9.661                            | 2 [32,42]                                |
| <i>Cell</i>                                                                            | 30.410                           | 2 [22,44]                                |
| <i>Gut</i>                                                                             | 16.658                           | 4 [59,64,41,62]                          |
| <i>British Medical Journal</i>                                                         | 20.785                           | 1 [28]                                   |
| <i>Science</i>                                                                         | 37.205                           | 1 [29]                                   |
| <i>Human Pathology</i>                                                                 | 3.014                            | 1 [39]                                   |
| <i>Laboratory Investigation</i>                                                        | 4.857                            | 1 [48]                                   |
| <i>Canadian Journal of Gastroenterology and Hepatology</i>                             | 2.147                            | 1 [43]                                   |
| <i>Nature Reviews Immunology</i>                                                       | 39.932                           | 1 [55]                                   |
| <i>Medicine (Baltimore)</i>                                                            | 1.804                            | 1 [61]                                   |
| <i>Journal of Immunology</i>                                                           | 4.856                            | 1 [65]                                   |

- Gastroenterology related journals (Gastroenterology, and Gut) only published 16 (32%) articles out of the top highly cited 50 articles

**Table 4** Authors and co-authors of two or more articles of the top-cited articles in inflammatory bowel disease identified by searching the Web of Science

| Author's name* | Number [References] |                                | Author's Name* | Number [References] |                   |
|----------------|---------------------|--------------------------------|----------------|---------------------|-------------------|
|                | First author        | Coauthor                       |                | First author        | Coauthor          |
| Hugot, JP      | 1 [20]              | 2 [34,45]                      | Daly, MJ       | -                   | 5[29,34,51,45,33] |
| Podolsky, DK   | 1 [25]              | 3 [28,27,31]                   | Steinhart, AH  | -                   | 5[29,34,43,51,45] |
| Targan, SR     | 1 [26]              | 7 [29,31,34,43,51,45,33]       | Griffiths, A   | -                   | 4[29,34,51,45]    |
| Hanauer, SB    | 1 [24]              | 6 [21,26,31,30,56,53]          | Dassopoulos, T | -                   | 2[29,34]          |
| Xavier, RJ     | 1 [27]              | 3 [34,51,33]                   | Bitton, A      | -                   | 3[29,34,33]       |
| Duerr, RH      | 1 [29]              | 4 [21,34,45,33]                | Datta, LW      | -                   | 3[29,34,51]       |
| Present, DH    | 2 [31,67]           | 3 [26,30,56]                   | Kistner, EO    | -                   | 2[29,34]          |
| Rutgeerts, P   | 1 [30]              | 9 [26,24,31,34,46,45,52,47,53] | Rotter, JI     | -                   | 5[29,34,51,45,33] |
| Fiocchi, C     | 1 [36]              | 1 [65]                         | Schumm, LP     | -                   | 5[29,34,51,45,52] |
| Barrett, JC    | 1 [34]              | 2 [45,33]                      | Lee, J         | -                   | 2[45,33]          |
| Riddell, RH    | 1 [39]              | 2 [43,60]                      | Lees, CW       | -                   | 2[45,33]          |
| Loftus, EV Jr  | 1 [35]              | 1 [43]                         | Sandborn, WJ   | -                   | 3[30,47,53]       |
| Franke, A      | 1 [45]              | 2 [33,54]                      | Barmada, MM    | -                   | 3[29,34,51]       |
| Silverberg, MS | 1 [43]              | 5 [29,34,51,45,33]             | Nicolae, DL    | -                   | 4[21,29,34,51]    |
| Rioux, JD      | 1 [51]              | 4 [29,34,45,33]                | Sands, BE      | -                   | 3[31,30,52]       |
| Lichtiger, S   | 1 [56]              | 1 [47]                         | Belaiche, J    | -                   | 2[20,34]          |
| Colombel, JF   | 2 [47,53]           | 5 [20,24,30,43,45]             | Laukens, D     | -                   | 3[34,45,33]       |
| Abraham, C     | 1 [57]              | 2 [29,33]                      | Lawrance, I    | -                   | 2[45,33]          |
| Becktel, JM    | -                   | 2 [23,58]                      | Louis, E       | -                   | 3[34,33,45]       |

1  
2  
3  
4  
5  
6  
7  
8  
9  
10  
11  
12  
13  
14  
15  
16  
17  
18  
19  
20  
21  
22  
23  
24  
25  
26  
27  
28  
29  
30  
31  
32  
33  
34  
35  
36  
37  
38  
39  
40  
41  
42  
43  
44  
45  
46  
47

|                 |   |                          |               |   |                   |
|-----------------|---|--------------------------|---------------|---|-------------------|
| Singleton,JW    | - | 2 [23,58]                | Vos,M         | - | 3[34,45,33]       |
| Kern,F Jr       | - | 2 [23,58]                | Vermeire,S    | - | 5[34,46,43,45,33] |
| Van Deventer,SJ | - | 4 [26,31,52,69]          | Satsangi,J    | - | 4[34,43,45,33]    |
| Mayer,L         | - | 3 [26,24,31]             | Bernstein,CN  | - | 2[43,52]          |
| Braakman,T      | - | 2 [26,31]                | Tremelling,M  | - | 2[34,33]          |
| DeWoody,KL      | - | 2 [26,31]                | Mansfield,J   | - | 3[34,45,33]       |
| Schaible,TF     | - | 2 [26,31]                | Jewell,D      | - | 2[34,43]          |
| Feagan,BG       | - | 3 [24,30,52]             | Mathew,CG     | - | 4[34,45,33,54]    |
| Lichtenstein,GR | - | 2 [24,30]                | Parkes,M      | - | 3[34,45,33]       |
| Schreiber,S     | - | 7 [24,43,45,33,54,53,68] | Georges,M     | - | 3[34,45,33]       |
| Rachmilewitz,D  | - | 4 [24,30,52,47]          | Karban,A      | - | 2[43,45]          |
| Wolf,DC         | - | 2 [24,52]                | Gossum,A      | - | 2[34,45]          |
| Olson,A         | - | 2 [24,30]                | Franchimont,D | - | 3[34,45,33]       |
| Taylor,KD       | - | 5 [29,34,51,45,33]       | Newman,W      | - | 2[45,33]          |
| Bayless, TM     | - | 2 [21,45]                | Regueiro,M    | - | 5[29,34,51,45,33] |
| Cho, JH         | - | 7 [21,29,34,51,45,33,57] | Kornbluth,A   | - | 2[56,47]          |

\*Author's name= family name, abbreviations of first or first and second names.

**Table 5** Grading the top-cited articles in inflammatory bowel disease according to the Oxford Centre for Evidence-based Medicine – Levels of Evidence.

| Level | Domain                                          | Characteristics and description                                                       | Articles number [References]              |
|-------|-------------------------------------------------|---------------------------------------------------------------------------------------|-------------------------------------------|
| 1a    | Therapeutic/<br>Prevention,<br>Aetiology/Harm   | Systematic reviews of RCTs (with consistent results from individual studies)          | 1 (33)                                    |
|       | Prognosis                                       | Systematic reviews with homogeneity of inception cohort studies                       |                                           |
|       | Diagnosis                                       | Systematic reviews with homogeneity of Level 1 diagnostic studies                     |                                           |
|       | Differential diagnosis/symptom prevalence study | Systematic reviews with homogeneity of prospective cohort studies.                    |                                           |
| 1b    | Therapeutic/<br>Prevention,<br>Aetiology/Harm   | Individual RCT (with narrow confidence intervals)                                     | 12 [26,24,30,56,58,52,47,53,50,66,67, 59] |
|       | Prognosis                                       | Individual inception cohort study with >80% follow-up                                 |                                           |
|       | Diagnosis                                       | Validating cohort study with good reference standards                                 |                                           |
|       | Differential diagnosis/symptom prevalence study | Prospective cohort study with good follow-up                                          |                                           |
| 2a    | Therapeutic/<br>Prevention,<br>Aetiology/Harm   | Systematic review of cohort studies (with consistent results from individual studies) | 2 [34,63]                                 |

1  
2  
3  
4  
5  
6  
7  
8  
9  
10  
11  
12  
13  
14  
15  
16  
17  
18  
19  
20  
21  
22  
23  
24  
25  
26  
27  
28  
29  
30  
31  
32  
33  
34  
35  
36  
37  
38  
39  
40  
41  
42  
43  
44  
45  
46  
47

|    |                                                 |                                                                                                              |              |
|----|-------------------------------------------------|--------------------------------------------------------------------------------------------------------------|--------------|
|    |                                                 |                                                                                                              |              |
|    | Prognosis                                       | Systematic review with homogeneity of either retrospective cohort studies or untreated control groups in RCT |              |
|    | Diagnosis                                       | Systematic review with homogeneity of Level > 2 diagnostic studies                                           |              |
|    | Differential diagnosis/symptom prevalence study | Systematic review with homogeneity of 2b and better studies                                                  |              |
| 2b | Therapeutic/ Prevention, Aetiology/Harm         | Individual cohort study (including low quality RCT; e.g., <80% follow-up)                                    | 3 [31,46,49] |
|    | Prognosis                                       | Retrospective cohort study or follow-up untreated control patients in an RCT                                 |              |
|    | Diagnosis                                       | Exploratory cohort study with good reference standards                                                       |              |
|    | Differential diagnosis/symptom prevalence study | Retrospective cohort study or poor follow-up                                                                 |              |
| 2c | Therapeutic/ Prevention, Aetiology/Harm         | Outcome studies (analysis of large registries)                                                               | 3 [38,60,61] |
|    | Prognosis                                       | Outcomes research                                                                                            |              |
|    | Diagnosis                                       |                                                                                                              |              |
|    | Differential diagnosis/symptom                  | Ecological studies                                                                                           |              |

|    |                                                       |                                                                                                  |                                                   |
|----|-------------------------------------------------------|--------------------------------------------------------------------------------------------------|---------------------------------------------------|
|    | prevalence study                                      |                                                                                                  |                                                   |
| 3a | Therapeutic/<br>Prevention,<br>Aetiology/Harm         | Systemic reviews of case-control studies<br>(with consistent results from individual<br>studies) | 9 [25,27,36,35,41,43,55,45,57]                    |
|    | Prognosis                                             |                                                                                                  |                                                   |
|    | Diagnosis                                             | Systematic reviews with homogeneity<br>of 3b and better studies                                  |                                                   |
|    | Differential<br>diagnosis/symptom<br>prevalence study | Systematic reviews with homogeneity<br>of 3b and better studies                                  |                                                   |
| 3b | Therapeutic/<br>Prevention,<br>Aetiology/Harm         | Individual case-control study                                                                    | 15 [20,21,22,28,29,44,40,32,51,42,54,62,64,65,68] |
|    | Prognosis                                             |                                                                                                  |                                                   |
|    | Diagnosis                                             | Non consecutive study, or without<br>consistently applied reference<br>standards                 |                                                   |
|    | Differential<br>diagnosis/symptom<br>prevalence study | Non consecutive cohort study or very<br>limited population                                       |                                                   |
| 4  | Therapeutic/<br>Prevention,<br>Aetiology/Harm         | Case series (and poor quality cohort and<br>case-control studies)                                | 5 [23,39,37,48,69]                                |
|    | Prognosis                                             | Case-series (and poor quality prognostic<br>cohort studies)                                      |                                                   |
|    | Diagnosis                                             | Case-control study, poor or non-                                                                 |                                                   |



1  
2  
3  
4  
5  
6  
7  
8  
9  
10  
11  
12  
13  
14  
15  
16  
17  
18  
19  
20  
21  
22  
23  
24  
25  
26  
27  
28  
29  
30  
31  
32  
33  
34  
35  
36  
37  
38  
39  
40  
41  
42  
43  
44  
45  
46  
47

|   |                                                 |                                                                                               |       |
|---|-------------------------------------------------|-----------------------------------------------------------------------------------------------|-------|
|   |                                                 | independent reference standard                                                                |       |
|   | Differential diagnosis/symptom prevalence study | Case-series or superseded reference standards                                                 |       |
| 5 | Therapeutic/ Prevention, Aetiology/Harm         | Expert opinion without explicit critical appraisal or based on physiology, or bench research. | 0 [0] |
|   | Prognosis                                       | Expert opinion without explicit critical appraisal or based on physiology, or bench research. |       |
|   | Diagnosis                                       | Expert opinion without explicit critical appraisal or based on physiology, or bench research. |       |
|   | Differential diagnosis/symptom prevalence study | Expert opinion without explicit critical appraisal or based on physiology, or bench research. |       |

Peer Review Only

1  
2  
3  
4  
5  
6  
7  
8  
9  
10  
11  
12  
13  
14  
15  
16  
17  
18  
19  
20  
21  
22  
23  
24  
25  
26  
27  
28  
29  
30  
31  
32  
33  
34  
35  
36  
37  
38  
39  
40  
41  
42  
43  
44  
45  
46  
47

For peer review only

1  
2  
3  
4  
5  
6  
7  
8  
9  
10  
11  
12  
13  
14  
15  
16  
17  
18  
19  
20  
21  
22  
23  
24  
25  
26  
27  
28  
29  
30  
31  
32  
33  
34  
35  
36  
37  
38  
39  
40  
41  
42  
43  
44  
45  
46  
47  
48  
49  
50  
51  
52  
53  
54  
55  
56  
57  
58  
59  
60

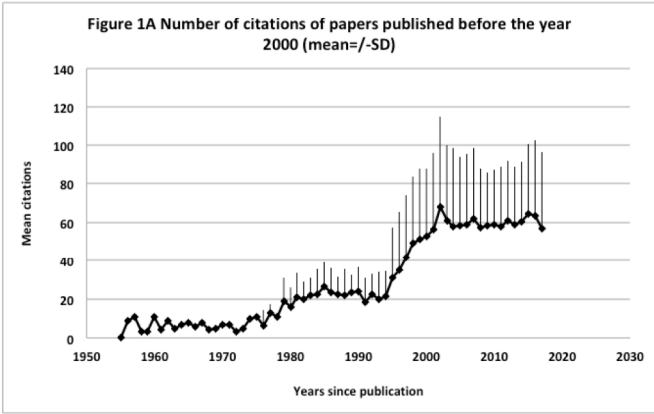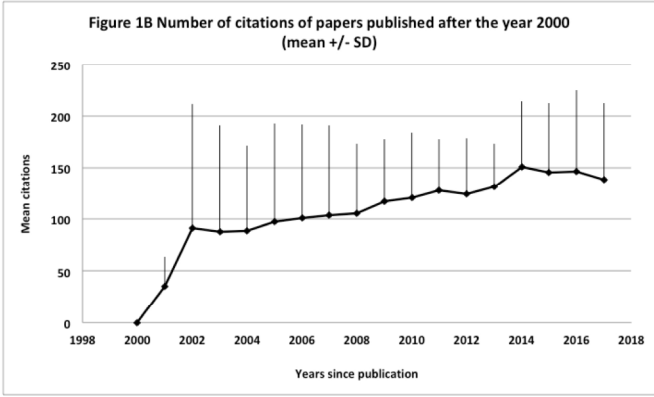

209x296mm (300 x 300 DPI)

## Appendix 1.

Top-cited articles on inflammatory bowel disease identified by searching the Web of Science database<sup>a</sup>

| Rank | Authors, Year [Reference]         | Article ( <i>Journal</i> )                                                                                            | 2016-JIF | Category          | Number of citations, Web of Knowledge | Average citation per year <sup>b</sup> | Rank of the article in the journal publishing it <sup>c</sup> | Origin: First author's organization, location (country)                                                                                     |
|------|-----------------------------------|-----------------------------------------------------------------------------------------------------------------------|----------|-------------------|---------------------------------------|----------------------------------------|---------------------------------------------------------------|---------------------------------------------------------------------------------------------------------------------------------------------|
| 1    | Hugot et al, 2001 <sup>20</sup>   | Association of NOD2 leucine-rich repeat variants with susceptibility to Crohn's disease. ( <i>NATURE</i> ).           | 40.137   | Basic research    | 3,555                                 | 209.1                                  | 134                                                           | Fondation Jean Dausset CEPH (France)                                                                                                        |
| 2    | Ogura et al, 2001 <sup>21</sup>   | A frameshift mutation in NOD2 associated with susceptibility to Crohn's disease. ( <i>NATURE</i> ).                   | 40.137   | Basic research    | 3,285                                 | 193.2                                  | 159                                                           | The University of Michigan Medical School, Michigan (United States).                                                                        |
| 3    | Kuhn et al, 1993 <sup>22</sup>    | Interleukin-10-deficient mice develop chronic enterocolitis. ( <i>CELL</i> )                                          | 30.410   | Basic research    | 2,982                                 | 119.3                                  | 67                                                            | Institute for Genetics, University of Cologne, (Germany)                                                                                    |
| 4    | Best et al, 1976 <sup>23</sup>    | Development of a Crohns-disease activity index-National cooperative Chrons-disease study ( <i>Gastroenterology</i> ). | 18.392   | Clinical research | 2,533                                 | 60.3                                   | 2                                                             | Hines Veterans Administration Cooperative Studies Support Center, University of Colorado Medical Center, Denver, Colorado, (United States). |
| 5    | Hanauer et al, 2002 <sup>24</sup> | Maintenance infliximab for Crohn's disease: the ACCENT I randomized trial ( <i>Lancet</i> )                           | 47.831   | Clinical research | 2,442                                 | 152.6                                  | 46                                                            | University of Chicago Medical Center, Chicago, IL (United States).                                                                          |
| 6    | Podolsky, 2002 <sup>25</sup>      | Inflammatory bowel disease. ( <i>New England Journal of Medicine</i> )                                                | 72.406   | Review            | 2,423                                 | 151.4                                  | 163                                                           | Massachusetts General Hospital and Harvard Medical School, Boston,                                                                          |

|    |                                         |                                                                                                                                                      |        |                   |       |       |     |                                                                                                       |
|----|-----------------------------------------|------------------------------------------------------------------------------------------------------------------------------------------------------|--------|-------------------|-------|-------|-----|-------------------------------------------------------------------------------------------------------|
|    |                                         |                                                                                                                                                      |        |                   |       |       |     | Massachusetts (United States).                                                                        |
| 7  | Targan et al, 1997 <sup>26</sup>        | A short-term study of chimeric monoclonal antibody cA2 to tumor necrosis factor alpha for Crohn's disease ( <i>New England Journal of Medicine</i> ) | 72.406 | Clinical research | 2,364 | 112.6 | 169 | Cedars-Sinai Medical Center, Los Angeles, California (United States)                                  |
| 8  | Xavier and Podolsky, 2007 <sup>27</sup> | Unravelling the pathogenesis of inflammatory bowel disease ( <i>NATURE</i> )                                                                         | 40.137 | Review            | 2,036 | 185.1 | 450 | Massachusetts General Hospital, Harvard Medical School, Boston, Massachusetts (United States).        |
| 9  | Truelove and Witts, 1955 <sup>28</sup>  | Cortisone in ulcerative colitis- Final report on a therapeutic trial ( <i>British Medical Journal</i> ).                                             | 20.785 | Clinical research | 1,871 | 29.7  | 20  | Nuffield Department of Clinical Medicine, Oxford (United Kingdom)                                     |
| 10 | Duerr et al, 2006 <sup>29</sup>         | A genome-wide association study identifies IL23R as an inflammatory bowel disease gene. ( <i>SCIENCE</i> ).                                          | 37.205 | Clinical research | 1,862 | 155.2 | 530 | Department of Medicine, School of Medicine, University of Pittsburgh, Pittsburgh, PA (United States). |
| 12 | Rutgeerts et al, 2005 <sup>30</sup>     | Infliximab for induction and maintenance therapy for ulcerative colitis ( <i>New England Journal of Medicine</i> )                                   | 72.406 | Clinical research | 1,834 | 141.1 | 290 | University Hospital Gasthuisberg, Leuven, (Belgium).                                                  |
| 12 | Present et al, 1999 <sup>31</sup>       | Infliximab for treatment of fistulas in patients with Crohn's disease ( <i>New England Journal of Medicine</i> )                                     | 72.406 | Clinical research | 1,730 | 91.0  | 321 | Mount Sinai Medical Center, New York, NY, (United States)                                             |

|    |                                         |                                                                                                                                                                                                            |        |                      |       |       |     |                                                                                                            |
|----|-----------------------------------------|------------------------------------------------------------------------------------------------------------------------------------------------------------------------------------------------------------|--------|----------------------|-------|-------|-----|------------------------------------------------------------------------------------------------------------|
| 13 | Frank et al, 2007 <sup>32</sup>         | Molecular-phylogenetic characterization of microbial community imbalances in human inflammatory bowel diseases. ( <i>Proceedings of the National Academy of Sciences of the United States of America</i> ) | 9.661  | Basic research       | 1,650 | 150.0 | 172 | University of Colorado, Boulder, CO (United States)                                                        |
| 14 | Jostins et al, 2012 <sup>33</sup>       | Host-microbe interactions have shaped the genetic architecture of inflammatory bowel disease. ( <i>Nature</i> )                                                                                            | 40.137 | Review Meta-analysis | 1,643 | 273.8 | 683 | Wellcome Trust Sanger Institute, Wellcome Trust Genome Campus, Hinxton, Cambridge, (United Kingdom)        |
| 15 | Barrett et al, 2008 <sup>34</sup>       | Genome-wide association defines more than 30 distinct susceptibility loci for Crohn's disease. ( <i>Nature Genetics</i> )                                                                                  | 27.959 | Review Meta-analysis | 1,631 | 163.1 | 25  | Wellcome Trust Centre for Human Genetics, University of Oxford, Roosevelt Drive, Oxford (United Kingdom)   |
| 16 | Loftus, 2004 <sup>35</sup>              | Clinical epidemiology of inflammatory bowel disease: Incidence, prevalence, and environmental influences ( <i>Gastroenterology</i> )                                                                       | 18.392 | Review               | 1,566 | 111.9 | 10  | Mayo Clinic, Rochester, Minnesota, (United States)                                                         |
| 17 | Fiocchi, 1998 <sup>36</sup>             | Inflammatory bowel disease: Etiology and pathogenesis ( <i>Gastroenterology</i> )                                                                                                                          | 18.392 | Review               | 1,540 | 77.0  | 12  | University Hospitals of Cleveland Case Western Reserve University School of Medicine, Ohio (United States) |
| 18 | Harvey and Bradshaw, 1980 <sup>37</sup> | A simple index of Crohns-disease activity ( <i>Lancet</i> )                                                                                                                                                | 47.831 | Clinical research    | 1,466 | 38.6  | 166 | Bristol Royal Infirmary and Frenchay Hospital, Bristol (United Kingdom)                                    |
| 19 | Molodeck                                | Increasing incidence and prevalence                                                                                                                                                                        | 18.392 | Review               | 1,438 | 239.7 | 19  | University of Calgary,                                                                                     |

|    |                                      |                                                                                                                                                                                                                                                          |        |                      |       |       |     |                                                                                                  |
|----|--------------------------------------|----------------------------------------------------------------------------------------------------------------------------------------------------------------------------------------------------------------------------------------------------------|--------|----------------------|-------|-------|-----|--------------------------------------------------------------------------------------------------|
|    | y et al, 2012 <sup>38</sup>          | of the inflammatory bowel diseases with time, based on systematic review. ( <i>Gastroenterology</i> ).                                                                                                                                                   |        |                      |       |       |     | Calgary, Alberta, (Canada).                                                                      |
| 20 | Riddell et al, 1983 <sup>39</sup>    | Dysplasia in inflammatory bowel disease- Standardized classification with provisional clinical applications ( <i>Human Pathology</i> )                                                                                                                   | 3.014  | Article              | 1,398 | 39.9  | 2   | National Foundation for Ileitis and Colitis, New York, (United States).                          |
| 21 | Okayasu et al, 1990 <sup>40</sup>    | A novel method in the induction of reliable experimental acute and chronic ulcerative-colitis in mice ( <i>Gastroenterology</i> )                                                                                                                        | 18.392 | Basic research       | 1,396 | 49.9  | 24  | School of Medicine, Tokyo Medical and Dental University, (Japan).                                |
| 22 | Eaden et al, 2001 <sup>41</sup>      | The risk of colorectal cancer in ulcerative colitis: a meta-analysis. ( <i>Gut</i> ).                                                                                                                                                                    | 16.658 | Review Meta-analysis | 1,388 | 81.6  | 1   | Leicester General Hospital, Gwendolen Road, Leicester (United Kingdom)                           |
| 23 | Sokol et al, 2008 <sup>42</sup>      | Faecalibacterium prausnitzii is an anti-inflammatory commensal bacterium identified by gut microbiota analysis of Crohn disease patients. <i>Proceedings of the National Academy of Sciences of the United States of America</i> )                       | 9.661  | Basic research       | 1,384 | 138.4 | 247 | Institut National de la Recherche Agronomique U910, Domaine de Vilvert, Jouy-en-Josas, (France). |
| 24 | Silverberg et al, 2005 <sup>43</sup> | Toward an integrated clinical, molecular and serological classification of inflammatory bowel disease: report of a Working Party of the 2005 Montreal World Congress of Gastroenterology. ( <i>Canadian Journal of Gastroenterology and Hepatology</i> ) | 2.147  | Report               | 1,373 | 105.6 | 1   | Mount Sinai Hospital IBD Centre, University of Toronto, Toronto, Ontario (Canada)                |

|    |                                    |                                                                                                                                    |        |                      |       |       |     |                                                                                                                                                         |
|----|------------------------------------|------------------------------------------------------------------------------------------------------------------------------------|--------|----------------------|-------|-------|-----|---------------------------------------------------------------------------------------------------------------------------------------------------------|
| 25 | Sadlack et al, 1993 <sup>44</sup>  | Ulcerative colitis-like disease in mice with a disrupted interleukin-2 gene ( <i>CELL</i> )                                        | 30.410 | Basic research       | 1,358 | 54.32 | 387 | Institute of Virology and Immunobiology, University of Würzburg, (Germany)                                                                              |
| 26 | Franke et al, 2010 <sup>45</sup>   | Genome-wide meta-analysis increases to 71 the number of confirmed Crohn's disease susceptibility loci. ( <i>Nature Genetics</i> )  | 27.959 | Review Meta-analysis | 1,321 | 165.1 | 63  | Institute of Clinical Molecular Biology, Christian-Albrechts-University Kiel, Kiel, (Germany).                                                          |
| 27 | Baert et al, 2003 <sup>46</sup>    | Influence of immunogenicity on the long-term efficacy of infliximab in Crohn's disease. ( <i>New England Journal of Medicine</i> ) | 72.406 | Clinical research    | 1,297 | 86.5  | 562 | University Hospital Gasthuisberg, Leuven, (Belgium).                                                                                                    |
| 28 | Colombel et al, 2010 <sup>47</sup> | Infliximab, azathioprine, or combination therapy for Crohn's disease ( <i>New England Journal of Medicine</i> )                    | 72.406 | Clinical research    | 1,294 | 161.7 | 565 | Hôpital Claude Huriez and Centre d'Investigation Clinique, Centre Hospitalier Universitaire de Lille, Université Lille Nord de France, Lille, (France). |
| 29 | Cooper et al, 1993 <sup>48</sup>   | Clinicopathologic study of dextran sulfate sodium experimental murine colitis. ( <i>Laboratory Investigation</i> )                 | 4.857  | Basic research       | 1,219 | 48.8  | 4   | Hahnemann University, Philadelphia, Pennsylvania. (United States)                                                                                       |
| 30 | Ekbom et al, 1990 <sup>49</sup>    | Ulcerative colitis and colorectal cancer. A population-based study. ( <i>New England Journal of Medicine</i> )                     | 72.406 | Clinical research    | 1,168 | 41.7  | 684 | University Hospital, Uppsala, (Sweden).                                                                                                                 |



|    |                                     |                                                                                                                                                                 |        |                   |       |       |     |                                                                                                                                   |
|----|-------------------------------------|-----------------------------------------------------------------------------------------------------------------------------------------------------------------|--------|-------------------|-------|-------|-----|-----------------------------------------------------------------------------------------------------------------------------------|
| 31 | Schroeder et al, 1987 <sup>50</sup> | Coated oral 5-aminosalicylic acid therapy for mildly to moderately active ulcerative colitis. A randomized study ( <i>New England Journal of Medicine</i> )     | 72.406 | Clinical research | 1,156 | 37.3  | 695 | Mayo Clinic, Rochester, MN (United States)                                                                                        |
| 32 | Rioux et al, 2007 <sup>51</sup>     | Genome-wide association study identifies new susceptibility loci for Crohn disease and implicates autophagy in disease pathogenesis. ( <i>Nature Genetics</i> ) | 27.959 | Basic research    | 1,152 | 104.7 | 89  | Université de Montréal and the Montreal Heart Institute, Research Center, Montreal, Quebec (Canada).                              |
| 33 | Sands et al, 2004 <sup>52</sup>     | Infliximab maintenance therapy for fistulizing Crohn's disease. ( <i>New England Journal of Medicine</i> )                                                      | 72.406 | Clinical research | 1,146 | 81.8  | 706 | Massachusetts General Hospital, and Harvard Medical School, Boston (United States)                                                |
| 34 | Colombel et al, 2007 <sup>53</sup>  | Adalimumab for maintenance of clinical response and remission in patients with Crohn's disease: the CHARM trial. ( <i>Gastroenterology</i> ).                   | 18.392 | Clinical research | 1,124 | 102.2 | 32  | Hôpital Claude Huriez, Centre Hospitalier Universitaire de Lille, Rue Michel Polonovski, Lille, (France)                          |
| 35 | Hampe et al, 2007 <sup>54</sup>     | A genome-wide association scan of nonsynonymous SNPs identifies a susceptibility variant for Crohn disease in ATG16L1. ( <i>Nature Genetics</i> )               | 27.959 | Basic research    | 1,123 | 102.1 | 92  | Institute for Clinical Molecular Biology, Christian-Albrechts University Kiel, University Hospital Schleswig-Holstein, (Germany). |

|    |                                       |                                                                                                                       |        |                   |       |       |     |                                                                                                                               |
|----|---------------------------------------|-----------------------------------------------------------------------------------------------------------------------|--------|-------------------|-------|-------|-----|-------------------------------------------------------------------------------------------------------------------------------|
| 36 | Bouma and Strober, 2003 <sup>55</sup> | The immunological and genetic basis of inflammatory bowel disease. ( <i>Nature Reviews Immunology</i> )               | 39.932 | Review            | 1,116 | 74.4  | 35  | National Institutes of Health, and National Institutes of Allergy and Infectious Diseases, Bethesda, Maryland (United States) |
| 37 | Lichtiger et al, 1994 <sup>56</sup>   | Cyclosporine in severe ulcerative colitis refractory to steroid therapy. ( <i>New England Journal of Medicine</i> )   | 72.406 | Clinical research | 1,104 | 46.0  | 755 | Mount Sinai School of Medicine, New York (United States).                                                                     |
| 38 | Abraham et al, 2009 <sup>57</sup>     | Inflammatory bowel disease. ( <i>New England Journal of Medicine</i> )                                                | 72.406 | Review            | 1,091 | 121.2 | 772 | Yale University School of Medicine, New Haven, CT (United States)                                                             |
| 39 | Summers et al, 1979 <sup>58</sup>     | National Cooperative Crohn's Disease Study: results of drug treatment ( <i>Gastroenterology</i> )                     | 18.392 | Clinical research | 1,059 | 27.1  | 37  | Division of gastroenterology, University of Iowa Medical Center, Iowa City, Virginia, (United States).                        |
| 40 | Satsangi, et al 2006 <sup>59</sup>    | The Montreal classification of inflammatory bowel disease: controversies, consensus, and implications ( <i>Gut</i> ). | 16.658 | Report            | 1,054 | 87.8  | 7   | Gstrointestinal Unit, Western General Hospital, University of Edinburg, (United Kingdom).                                     |
| 41 | Elson, et al, 1995 <sup>60</sup>      | Experimental models of inflammatory bowel disease. ( <i>Gastroenterology</i> ).                                       | 18.392 | Review            | 957   | 41.6  | 40  | Department of Medicine, University of Alabama Hospital at Birmingham, AL, (United States).                                    |

|    |                                      |                                                                                                                                                                                                                                                                                |        |                |     |      |    |                                                                                                                                                                     |
|----|--------------------------------------|--------------------------------------------------------------------------------------------------------------------------------------------------------------------------------------------------------------------------------------------------------------------------------|--------|----------------|-----|------|----|---------------------------------------------------------------------------------------------------------------------------------------------------------------------|
| 42 | Greenstein et al, 1976 <sup>61</sup> | The extra-intestinal complications of Crohn's disease and ulcerative colitis: a study of 700 patients. <i>Medicine (Baltimore)</i> .                                                                                                                                           | 1.804  | Review         | 945 | 22.5 | 10 | Department of Surgery, Mount Sinai School of Medicine and the City University of New York, New York, (United States.)                                               |
| 43 | Fujino et al, 2003 <sup>62</sup>     | Increased expression of interleukin 17 in inflammatory bowel disease. ( <i>Gut</i> ).                                                                                                                                                                                          | 16.658 | Basic research | 931 | 62.1 | 12 | Shiga University of Medical Science, Seta-Tukinowa, Otsu, (Japan).                                                                                                  |
| 44 | Sartor, 2008 <sup>63</sup>           | Microbial influences in inflammatory bowel diseases. ( <i>Gastroenterology</i> ).                                                                                                                                                                                              | 18.392 | Review         | 925 | 92.5 | 44 | Department of Medicine, Center for Gastrointestinal Biology and Disease, University of North Carolina at Chapel Hill, Chapel Hill, North Carolina, (United States). |
| 45 | Manichanh et al, 2006 <sup>64</sup>  | Reduced diversity of faecal microbiota in Crohn's disease revealed by a metagenomic approach. ( <i>Gut</i> ).                                                                                                                                                                  | 16.658 | Basic research | 913 | 76.1 | 13 | Unité d'Ecologie et de Physiologie du système Digestif, INRA-UEPSD, 78350 Jouy-en-Josas, (France)                                                                   |
| 46 | Fuss et al, 1996 <sup>65</sup>       | Disparate CD4+ lamina propria (LP) lymphokine secretion profiles in inflammatory bowel disease. Crohn's disease LP cells manifest increased secretion of IFN-gamma, whereas ulcerative colitis LP cells manifest increased secretion of IL-5. ( <i>Journal of Immunology</i> ) | 4.856  | Basic research | 893 | 40.6 | 68 | National Institute of Allergy and Infectious Diseases, National Institutes of Health, Bethesda, MD, (United States)                                                 |
| 47 | Rutgeerts                            | Predictability of the postoperative                                                                                                                                                                                                                                            | 18.392 | Clinical       | 884 | 31.6 | 50 | Department of Medicine,                                                                                                                                             |

|    |                                        |                                                                                                                                             |        |                   |     |      |      |                                                                                                           |
|----|----------------------------------------|---------------------------------------------------------------------------------------------------------------------------------------------|--------|-------------------|-----|------|------|-----------------------------------------------------------------------------------------------------------|
|    | et al, 1990 <sup>66</sup>              | course of Crohn's disease. ( <i>Gastroenterology</i> ).                                                                                     |        | research          |     |      |      | University Hospital Gasthuisberg, University of Leuven, (Belgium).                                        |
| 48 | Present et al, 1980 <sup>67</sup>      | Treatment of Crohn's disease with 6-mercaptopurine. A long-term, randomized, double-blind study. ( <i>New England Journal of Medicine</i> ) | 72.406 | Clinical research | 874 | 23.0 | 1150 | Lenox Hill Hospital and the Mount Sinai School of Medicine of City University of New York (United States) |
| 49 | Swidsinski et al, 2002 <sup>68</sup>   | Mucosal flora in inflammatory bowel disease. ( <i>Gastroenterology</i> ).                                                                   | 18.392 | Basic research    | 873 | 54.6 | 52   | Charité Humboldt Universität, Berlin, (Germany).                                                          |
| 50 | Vandullem en et al, 1995 <sup>69</sup> | Treatment of Crohn's disease with anti-tumor necrosis factor chimeric monoclonal antibody (cA2). ( <i>Gastroenterology</i> ).               | 18.392 | Clinical research | 871 | 37.9 | 53   | Academic Medical Center, Amsterdam, (The Netherlands).                                                    |

<sup>a</sup> The search was conducted in April, 2018 by searching the Web of Knowledge.

<sup>b</sup> The average citation per year = total number of citation / number of years since publication.

<sup>c</sup> This ranking was identified by searching each journal for a top-cited article and identifying its ranking based on the number of citations received in comparison to the number of citations received by other articles published in that journal.

1  
2  
3  
4  
5  
6  
7  
8  
9  
10  
11  
12  
13  
14  
15  
16  
17  
18  
19  
20  
21  
22  
23  
24  
25  
26  
27  
28  
29  
30  
31  
32  
33  
34  
35  
36  
37  
38  
39  
40  
41  
42  
43  
44  
45  
46

For peer review only

# BMJ Open

## What can we learn from top-cited articles in inflammatory bowel disease? A bibliometric analysis and assessment of the level of evidence

|                                 |                                                                                                                                                 |
|---------------------------------|-------------------------------------------------------------------------------------------------------------------------------------------------|
| Journal:                        | <i>BMJ Open</i>                                                                                                                                 |
| Manuscript ID                   | bmjopen-2017-021233.R2                                                                                                                          |
| Article Type:                   | Research                                                                                                                                        |
| Date Submitted by the Author:   | 31-May-2018                                                                                                                                     |
| Complete List of Authors:       | Azer, Samy; King Saud University, Medical Education; Australian Professional Teaching, Azer, Sarah; St Vincent Hospital                         |
| <b>Primary Subject Heading</b>: | Gastroenterology and hepatology                                                                                                                 |
| Secondary Subject Heading:      | Gastroenterology and hepatology, Medical education and training, Medical publishing and peer review                                             |
| Keywords:                       | Inflammatory bowel disease (IBD), Ulcerative colitis (UC), Crohn's disease (CD), Bibliometric analysis, Top-cited articles, Quality of evidence |
|                                 |                                                                                                                                                 |

SCHOLARONE™  
Manuscripts

1  
2  
3 Amended version  
4  
5  
6  
7  
8

9  
10 **What can we learn from top-cited articles in**  
11 **inflammatory bowel disease? A bibliometric analysis**  
12 **and assessment of the level of evidence**  
13  
14

15  
16  
17  
18 Samy A. Azer<sup>1</sup> and Sarah Azer<sup>2</sup>  
19

20  
21 Dr Azer is a Consultant Gastroenterologist and Professor of Medical  
22 Education and the chair of Curriculum Development and Research Unit,  
23 College of Medicine, King Saud University, Riyadh, Saudi Arabia<sup>1</sup>  
24  
25

26  
27  
28 Registrar, St Vincent Hospital, University of Melbourne, Victoria,  
29 Australia<sup>2</sup>  
30  
31

32  
33  
34 Correspondence and requests for reprints should be addressed to:

35 Professor Samy Azer

36 Curriculum Development and Research Unit,

37 College of Medicine, King Saud University

38 P O Box 2925, Riyadh 11461

39 Saudi Arabia

40 Telephone: (966) 11-4699178

41 Fax: (966) 11-4699174  
42  
43

44 Email:azer2000@optusnet.com.au  
45  
46  
47

48  
49  
50  
51  
52 SHORT TITLE: Top-cited Inflammatory Bowel Disease  
53  
54

## ABSTRACT

**Background and Objectives:** Despite increasing number of publications in inflammatory bowel disease (IBD) no bibliometric analysis has been conducted to evaluate the significance of highly-cited articles. Our objectives were to identify the top-cited articles in IBD, assessing their characteristics, and determining the quality of evidence provided by these articles.

**Design and outcome measures:** IBD and related terms were used in searching the Web of Science to identify English language articles. The 50 top-cited articles were analyzed by year, journal impact factor (JIF), authorship, females in authorship, institute, country, and grants received. The level of evidence was determined using the Oxford Centre for Evidence-Based Medicine guidelines.

**Results:** The number of citations varied from 871 to 3555 with a total of 74638, and a median 1339.50, (IQR= 587). No correlations were found between the number of citations and number of years since publication ( $r=0.042$ ,  $p=0.771$ ), JIF ( $r= 0.186$ ,  $p=0.196$ ), number of authors ( $r= 0.061$ ,  $p=0.674$ ), females in authorship ( $r=0.064$ ,  $p=0.661$ ), number of institutes ( $r= 0.076$ ,  $p=0.602$ ), number of countries ( $r= 0.101$ ,  $p=0.483$ ), or number of grants ( $r= - 0.015$ ,  $p=0.915$ ). The first authors were from the United States ( $n= 24$ ), United Kingdom ( $n= 6$ ), Germany ( $n=5$ ), France ( $n=5$ ), Belgium ( $n=3$ ), and Canada ( $n=3$ ). The levels of evidence were 12 articles at level 1b, 9 articles at level 3a, and 15 articles at level 3b and fewer were at other levels.

**Conclusions:** Research papers represented 66% of articles. The majority of items have reasonably high levels of evidence; which may have contributed to the higher number of citations. The study also shows a gender gap in authorship in this area.

## Key words

Inflammatory bowel disease (IBD), Ulcerative colitis (UC), Crohn's disease (CD), Top-cited articles, Bibliometric analysis, Quality of evidence, Number of authors, Female authors, Grants/funds, Institutes, Countries.



### Strengths and limitations of the study

- More than one method was used in searching the Web of Science to maximize the yield of the search.
- The articles represent a historic perspective on key discoveries in the area of inflammatory bowel disease.
- A number of characteristics including journal impact factor, number of authors, number of females in authorship, number of institutes, number of countries involved, and grants received have been studied against citations received.
- The level of evidence for each article has been evaluated.
- The search was limited to articles in the English language, raising the possibility of failing to include top-cited articles in other languages.

## INTRODUCTION

The number of citations received by an article has been used for several years by universities and grant funding bodies in assessing the quality of research produced by researchers, ranking research performance and in making decisions regarding professional promotion and grant applications [1-4]. Thomson Reuters gather the names of these authors in the Highly Cited Researchers database where they are acknowledged for the quality of their work and the size of their research input in a particular area [5]. Although the number of citations cannot explain why researchers cited a particular paper nor reflect the quality of the research and the outcomes identified in a manuscript, the number of citations and the reputation of contribution to research in a particular field cannot be ignored. This is particularly important when there is a pattern of consistency and progressive input into a discipline over years (a life experience), and a demonstration from publication records and citation history of collaboration with other researchers from other institutes at local and international levels. Hence the credits given to an author or a group of authors and the impact of the work in a particular area can be proportionally related to the citation records [6]. The greater the citation history over years, the more influential they are in their specialty [7]. In this study, we hypothesized that examining the most cited in IBD may provide more insight into the significance of these articles and the level of evidence they present [8]. Considering the fact that there are over 91,000 articles on IBD in the literature as per our preliminary search of Web of Science, it is important to consider the characteristics of highly cited articles.

1  
2  
3 Inflammatory bowel disease comprises ulcerative colitis (UC) and Crohn's disease  
4 (CD); both pursue a relapsing and remitting course over years. While the two  
5  
6 diseases share several similarities, they have a number of differences with regard to  
7  
8 structures involved, pathogenesis, clinical presentation, and management  
9  
10 approaches. UC was first reported briefly in mid 1800 [9], while CD was reported in  
11  
12 *the Journal of the American Medical Association (JAMA)* later by Crohn, Ginzburg  
13  
14 and Oppenheimer in 1932 [10]; describing it as a chronic inflammatory bowel disease  
15  
16 of the ileum. Later, it was discovered that CD can involve any part of the  
17  
18 gastrointestinal tract from the lips to the anal margin but the ileocolonic disease  
19  
20 represents the common presentation. Since then both diseases have been  
21  
22 extensively researched in their different aspects.  
23  
24  
25  
26  
27  
28

29 We assumed that these articles may be a cornerstone in IBD, and may enable  
30  
31 researchers in understanding a range of aspects related to IBD. Therefore, the  
32  
33 bibliometric analysis of these articles including journal impact factor, authorship,  
34  
35 females in authorship, institute, country and grants received may explain key features  
36  
37 of a successful or influential article in IBD. The aims of the present research were (1)  
38  
39 identify the top-cited articles in IBD, and analyze their characteristics and (2) assess  
40  
41 the quality of evidence provided by articles.  
42  
43  
44  
45

## 46 **METHODS**

### 47 **Study Design**

48  
49  
50 The Web of Science database was searched for the identification of the top-cited  
51  
52 articles and tracking the citation records of each publication. Although Scopus and  
53  
54  
55  
56  
57  
58  
59  
60

1  
2  
3 Google Scholar also provide citation records, it was decided to limit the search to  
4  
5 Web of Science database. Compared to other databases, the Web of Science is  
6  
7 regularly updated and the 2015 Journal Citation Reports (JCRs) included more than  
8  
9 6,500 journals across 150 disciplines. Although Google Scholar database is freely  
10  
11 available, it was not used because it is difficult to search, and it cites textbooks,  
12  
13 monographs, conference proceedings, as well as non-peer reviewed publications  
14  
15 [11]. It is also not possible to track the yearly records of citations attracted by each  
16  
17 article since publication. Scopus database was not used because it is not extensive in  
18  
19 its coverage and its records only go back to 1996 [12]. Furthermore, several other  
20  
21 researchers have used Web of Science to identify top-cited articles [13,14,15]  
22  
23  
24  
25

26  
27 To achieve the aims of this study we planned to identify the highly cited articles in IBD  
28  
29 and assess if there were any correlation between the number of citations and any of  
30  
31 the parameters characterizing these highly cited articles. We also aim to grade each  
32  
33 article against the level of evidence hierarchy as per the Oxford Centre for Evidence-  
34  
35 Based Medicine (OCEBM-2011 Levels of Evidence and the accompanying Table of  
36  
37 Evidence Glossary) [16,17].  
38  
39  
40

### 41 **Searching the Web of Science database**

42  
43  
44 On 15 and 16 April 2018, the authors searched the Web of Science database to  
45  
46 retrieve top-cited articles in inflammatory bowel disease. The search words used  
47  
48 were the following: “Inflammatory bowel disease”, “Ulcerative colitis”, “Crohn’s  
49  
50 disease”, “IBD”, “Experimental colitis”, “Animal models for Colitis”, “Animal models for  
51  
52 inflammatory bowel disease”, “Pathology IBD”, “Pathology UC”, “Pathology CD”,  
53  
54  
55  
56  
57  
58  
59  
60

1  
2  
3 “Pathogenesis IBD”, “Pathogenesis UC”, “Pathogenesis CD”, “Treatment IBD”,  
4  
5 “Treatment UC”, “Treatment CD”, “Investigation IBD” and “Regional ileitis”. To  
6  
7 increase the yield of the search, we used the full terms- inflammatory bowel disease,  
8  
9 ulcerative colitis, and Crohn’s disease for the abbreviations IBD, UC, and CD,  
10  
11 respectively. These search words were identified from the terminology used in  
12  
13 gastroenterology journals and the proceedings of major conferences on inflammatory  
14  
15 bowel disease and gastroenterology such as the British Society of Gastroenterology  
16  
17 (BSG), the American Gastroenterological Association (AGA), American College of  
18  
19 Gastroenterology (ACG), Canadian Association of Gastroenterology (CAG), Scottish  
20  
21 Society of Gastroenterology (SSG), and Gastroenterological Society of Australia  
22  
23 (GESA). For each search word, the results were arranged using a link on the Web of  
24  
25 Science system, “sort-by” – “Time Cited- highest to lowest”. The results showed the  
26  
27 articles organized in a descending order with the articles most frequently cited at the  
28  
29 top. A copy of the results was printed out for further analysis. The findings from each  
30  
31 search word were then arranged on one Excel sheet (Microsoft Excel 2010, Microsoft  
32  
33 Corp, Redmond, WA) in descending order based on the number of citations.  
34  
35 Duplicate articles and articles not in the English language were excluded. In addition  
36  
37 to the absolute number of citations, we calculated the average citations per year for  
38  
39 each article. The average number of citations per year is the ratio calculated from the  
40  
41 number of citations obtained by an article divided by the number of years since  
42  
43 publication [18].  
44  
45  
46  
47  
48  
49  
50  
51

52 Using the above mentioned search words, we conducted another search of major  
53  
54 gastroenterology journals and the 2016-JCR under the category “Gastroenterology  
55  
56  
57  
58  
59  
60

1  
2  
3 and Hepatology". This category comprises 76 journals at the time of conducting the  
4 search; of these seven journals were in languages other than English and were not  
5 searched. Gastroenterology journals publishing articles not in the English language  
6 were excluded because neither the author nor the assistant researchers are  
7 competent in the Spanish, Italian or German languages. Since the language  
8 recommended by the journal publishing this work is English and its readers are most  
9 likely interested in research publications in the English language, we decided not to  
10 search these journals.  
11

12 Interestingly, after identifying the list of top-cited articles in IBD, and again checking  
13 these seven non-English journals, none had a paper with a citation higher than the  
14 paper ranked number 50 on the list.  
15

16 These key words were also used in searching the websites of major general  
17 medicine, surgery and research journals including the *New England Journal of*  
18 *Medicine, Lancet, the British Medical Journal, the Journal of the American Medical*  
19 *Association, Annals of Internal Medicine, Archives of Medicine, PLOS Medicine,*  
20 *Annals of Surgery, Archives of Surgery, British Journal of Surgery, American Journal*  
21 *of Surgical Pathology, Nature, Science, Nature Reviews Cancer, Nature Genetics,*  
22 *Nature Medicine, Cell, Nature Reviews Microbiology, Immunity, Nature Reviews*  
23 *Immunology, Nature Reviews Molecular Cell Biology, and Journal of Immunology.*  
24

25 A list identifying the 50 top-cited articles was reviewed again and checked regarding  
26 authorship, year of publication, title of the article, journal publishing the work, the  
27 Journal Impact Factor (JIF) at the time of the search, the number of citations and the  
28 institution of the first author (Appendix 1).  
29

## Inclusion And Exclusion Criteria

The inclusion criteria were: papers focusing on IBD (ulcerative colitis or Crohn's disease) written in the English language. The exclusion criteria were: (i) articles on inflammatory bowel disease in languages other than English, (ii) articles that focused on other diseases and inflammatory bowel disease was not the main focus, and (iii) studies that focus on other types of colitis and not inflammatory bowel disease.

## Assessing Articles

The full text of the identified 50-top cited articles was obtained and a copy was given to each researcher. The following information was collected for each article: (i) the authors' names, the number of authors, their affiliations, and the number of females contributing to authorship, (ii) the number of institutes involved in the publication, (iii) the city and country of the origin of the publication, (iv) the total number of citations obtained up to the day of searching the database, and the number of yearly citations since publication, (v) the year of publication and the calculated number of years since publication, and (vi) the number of funds/grants stated in the publication and the Web of Science.

We have not used the classification provided by the Web of Science regarding study type because we noted that the Web of Science groups publications as original research, articles, practical guides and reviews and identifies them as articles or reviews. For consistency and the purpose of this study, the top-cited articles were grouped into four types - article, review paper/meta-analysis, report, and research. A definition of each type is given in the glossary (Appendix 2). Two researchers

1  
2  
3 independently allocated each of the top-cited articles under its type as per the  
4 definition given. Any differences between the researchers were discussed in a  
5 meeting until a decision was reached.  
6  
7  
8  
9

10 The topics covered by the top-cited articles were identified by each researcher  
11 independently and were discussed in a meeting to harmonize the grouping into a  
12 logical, simple and practical way. Articles that covered more than one topic were  
13 classified on the basis of the aim of the study and the main outcomes. For other  
14 evaluations of an article including the number of authors, the number of females  
15 represented in authorship, the number of institutes, and countries contributing to the  
16 work, and the number of grants/funds received we checked the original article for  
17 such details. Institute was defined as the university where an author belonged. If an  
18 author belonged to two universities, this was considered to be two different institutes.  
19 Regarding the identification of females in the authorship we noted that several  
20 journals use abbreviations of the first and second name rather than the full name. In  
21 order to identify the females in these articles we tried to search the Google database  
22 to find the university, personal website of the author, their LinkedIn or ResearchGate  
23 accounts. We also tried to identify them by searching the Google Scholar database  
24 and identify their account, where we can find other publications under their name and  
25 the full first name. In two papers, despite our efforts, we failed to identify the gender  
26 of five authors and we contacted the corresponding authors. We received a response  
27 from one correspondence, making us unable to identify the gender of three authors in  
28 the second paper.  
29  
30  
31  
32  
33  
34  
35  
36  
37  
38  
39  
40  
41  
42  
43  
44  
45  
46  
47  
48  
49  
50  
51  
52  
53  
54  
55  
56  
57  
58  
59  
60



## Evaluating the Journals

The publishing journals of the top 50 articles in IBD were identified and evaluated in regard to the following: (i) the 2016-Journal Impact Factor (JIF) of each journal, and (ii) the ranking order of each article in comparison to other articles published in that journal. This was based on the number of citations obtained in comparison to the citation numbers received by other articles published in the journal. For example, an article ranked number one, in its publishing journal, means that the article received the highest number of citations in comparison to all other articles published in that journal. This evaluation aimed at assessing the position order of articles identified among the 50 top-cited articles in IBD in regard to their ranking among other articles published in the journal. Such assessment highlights the significance of the inflammatory bowel disease articles among other topics published in gastroenterological journals as well as general medicine journals such as *The New England Journal of Medicine*, *The Lancet*, *the British Medical Journal*, *Medicine*, and top research journals such as *Nature*, *Nature Genetics*, *Science*, *Cell*, and top journals in immunology such as *Nature Reviews Immunology* (Appendix 1).

## Assessing Level of Evidence

Two researchers independently used the Oxford Centre for Evidence-Based Medicine (OCEBM-2011 Levels of Evidence and the accompanying Table of Evidence Glossary) [16,17] to rank each article regarding level of evidence. In 1998 this hierarchical of evidence was first produced to make the process of finding relevant evidence feasible. Since then the levels have been reviewed and amended, and the

1  
2  
3 version used in this research is the currently available version. This evaluation aimed  
4  
5 at identifying the level of evidence of each article and assessing whether the highly  
6  
7 cited articles have received higher scores in regard to level of evidence as per the  
8  
9 Oxford hierarchy. The assessment required extensive review of each article since  
10  
11 quality descriptors exist for different types of studies and level of evidence vary  
12  
13 depending on therapeutic, prevention, prognostic, diagnostic, or prevalence design  
14  
15 [13,14].  
16  
17  
18  
19

### 20 **Statistical Analysis**

21  
22  
23 Pearson's correlation coefficient ( $r$ ) was calculated to determine if the high citation  
24  
25 numbers obtained was related to the age of the article. Other correlations were  
26  
27 between the number of citations and the number of authors, the percentage of  
28  
29 females in authorship, the number of institutes, the number of countries involved, the  
30  
31 number of grants received, and the Journal Impact Factor (JIF) of the journals in  
32  
33 which articles were published. Because of the assumption that researchers usually  
34  
35 cite recently published articles, it was decided to compare the mean yearly citations  
36  
37 received of articles published before the year 2000 and compare them with those  
38  
39 published after the year 2000. All analyses were conducted using SPSS Software  
40  
41 (IBM SPSS Statistics Premium version 22.0 for Mac OS-SPSS Inc., Chicago, IL,  
42  
43 USA) and the results were reported at total, mean, median, IQR, and percentage.  
44  
45  
46 The inter-rater agreement between evaluators was calculated using the Fleiss kappa  
47  
48 scale [19].  
49  
50  
51  
52  
53  
54  
55  
56  
57  
58  
59  
60

## Patient and Public involvement

This study did not involve patients or the public.

## RESULTS

### Top-Cited Papers Identified

The 50 top-cited articles in IBD identified by searching the Web of Science [20-69] have been summarized in Appendix 1. The articles are listed in an order from 1 to 50 with the highest absolute citation number is ranked 1 and the article with the lowest citation ranked 50 as per the day of the search.

Table 1 summarizes the year of publication and article type. The articles were published over 57 years (from 1955 to 2012). During the period from 1955 to 1976, only 3 articles (6%) were published. However, the number increased significantly from 1977 to 1994 making a total of 12 (24%) articles. The number of publications increased significantly to 35 (70%) during the years from 1995 to 2012. No correlation was found between the number of citations of these papers and the number of years since published (Pearson correlation ( $r$ ) = 0.042,  $p$  = 0.771). To assess if there were differences between old articles (published before the year 2000) and those published after the year 2000, it was decided to study the mean number of citations received by top-cited articles in each year after their publications. The year 2000 was taken as a midpoint for comparison because the majority of articles identified were published in the period after the year 1986, and hence the year 2000 could represent such point. As shown from Figures 1A and 1B, the mean numbers of citations were higher for articles published after the year 2000 compared to those published before

1  
2  
3 the year 2000. Approximately one fourth of the top-cited papers were reviews/meta-  
4 analysis (n= 14, 28%), two-thirds were research papers (n= 33, 66%), and the  
5  
6 remaining were an article (n= 1, 2%) and two reports (n=2, 4%).  
7  
8  
9

10 Table 2 summarizes the distribution of IBD topics covered in the top-cited articles.

11  
12 These can be summarized as follows: epidemiology and prevalence (n=2, 4%),  
13  
14 Crohn's disease genetic susceptibility and NOD2 mutation (n=6, 12%), Animal  
15  
16 models (n= 5, 10%), Pathogenesis of IBD (n= 15, 30%), classification and index of  
17  
18 disease activity (n= 5, 10%), risk of developing colorectal cancer (n= 2, 4%), extra-  
19  
20 intestinal complications (n= 1, 2%), Infliximab in Crohn's disease (n= 6, 12%),  
21  
22 corticosteroids in ulcerative colitis (n=1, 2%), drug treatment and cyclosporine in  
23  
24 ulcerative colitis (n= 2, 4%), adalimumab in Crohn's disease (n=1, 2%), 5-  
25  
26 aminosalicylic acid in ulcerative colitis (n=1, 2%), 6-mercaptopurine in Crohn's  
27  
28 disease (n=1, 2%), and monoclonal antibiotics, and anti-tumour necrosis factor in  
29  
30 Crohn's disease (n=2, 4%). As shown in Appendix 1, 14 (28%) were basic research  
31  
32 and 19 (38%) were clinical research. The level of evidence is discussed later in the  
33  
34 results.  
35  
36  
37  
38  
39  
40

41 The articles were published in the following journals: *New England Journal of*  
42  
43 *Medicine* (n= 12, 24%), *Gastroenterology* (n= 12, 24%), *Nature* (n=4, 8%), *Nature*  
44  
45 *Genetics* (n=4, 8%), *The Lancet* (n= 2, 4%), *Proceedings of the National Academic of*  
46  
47 *Sciences of the United States of America* (n=2, 4%), *Cell* (n= 2, 4%), and *Gut* (n= 4,  
48  
49 8%). See Table 3 for more details about the journals publishing these articles.  
50  
51  
52  
53  
54  
55  
56  
57  
58  
59  
60

1  
2  
3 Looking at the ranking of the top-cited articles in IBD in the journals they were  
4 published in could provide a better picture about the influence of these articles. This  
5 influence would be clearly demonstrated when the journal has a relatively higher  
6 Journal Impact Factor. The ranking is based on the number of citations received by  
7 an article compared to the number of citations received by other articles that were  
8 published in that journal. The article by Best et al (1976) [23] is ranked number 4 in  
9 the list, and also ranked number 2 among all articles published in *Gastroenterology*  
10 (2016-JIF = 18.392). The article by Eaden et al [41] is ranked number 22 in the list  
11 and also ranked number 1 among all articles published in *Gut* (2016-JIF= 16.658).  
12 The ranking of other articles in List and their rankings in the journals in which they  
13 were published are shown in Appendix 1.  
14  
15  
16  
17  
18  
19  
20  
21  
22  
23  
24  
25  
26  
27  
28

29 The first authors of the top-cited articles were from the United States (n= 24, 48%),  
30 the United Kingdom (n=6, 12%), Germany (n= 5, 10%), France (n= 5, 10%), Belgium  
31 (n= 3, 6%), Canada (n= 3, 6%), Japan (n=2, 4%), Sweden (n=1, 2%), and the  
32 Netherlands (n=1, 2%).  
33  
34  
35  
36  
37  
38

39 Table 4 summarises the 70 authors who have published two papers or more in the  
40 top-cited IBD. Of these 18 authors were the first author and coauthors of more than  
41 two papers in total, all the remaining, 52 were coauthors of more than two papers.  
42  
43  
44  
45

46 Top authors were Rutgeers, P (n=10 papers), Targan, SR (n=8 papers), Schreiber, S  
47 (n=7 papers), Cho, JH (n=7 papers), Colombel, JF (n=7 papers), Hanauer, SB (n=7  
48 papers), Silverberg, MS (n=6 papers), and each of the following authors have 5  
49 papers: Podolsky, DK, Rioux, JD, Daly MJ, Steinhart, AH, Rotter, JI, Schumm, LP,  
50 Taylor, KD, Vermeire, S, Duerr, RH, and Regueiro, M.  
51  
52  
53  
54  
55  
56  
57  
58  
59  
60

1  
2  
3 The leadership of universities and institutes that have contributed to the creation of  
4 these publications were Massachusetts General Hospital and Harvard Medical  
5 School, Boston, Massachusetts, the United States, Mount Sinai School of Medicine,  
6 New York, the United States, Mayo Clinic, Rochester, Minnesota, the United States,  
7 Cedars-Sinai Medical Center, Los Angeles, California, the United States, University of  
8 Chicago Medical Center, Chicago, Illinois, the United States, University of Pittsburgh,  
9 Pittsburgh, Pennsylvania, the United States, University Hospital of Cleveland Case  
10 Western Reserve University School of Medicine, Ohio, the United States, Wellcome  
11 Trust Centre for Human Genetics, University of Oxford, Roosevelt Drive, Oxford, the  
12 United Kingdom, Wellcome Trust Sanger Institute, Wellcome Trust Genome Campus,  
13 Cambridge, the United Kingdom, and Institute of Virology and Immunobiology,  
14 University of Würzburg, Germany. See Appendix 1 for more detail.

### 31 **Characteristics of the Top-Cited Articles**

32  
33  
34 These articles were created by 667 authors, median 7.0, minimum 1, maximum 106,  
35 IQR 9.5; the females in authorship were 111, median 1.0, minimum 0, maximum 20,  
36 IQR 2. It is worth mentioning here that it was difficult to identify the gender of some  
37 authors in two papers because the full first and middle names were not shown and it  
38 was difficult to find more information or clues to make a decision. We contacted the  
39 corresponding authors of these two articles; we received information for one article  
40 but we had no response from the corresponding author of the second article. Thus  
41 the gender of three authors could not be identified. The number of institutes involved  
42 were 436, median 3.0, minimum 1, maximum 88, IQR 9; the countries involved were  
43 141, median 1.0, minimum 1, maximum 16, IQR 2.75; and the number of grants/funds  
44  
45  
46  
47  
48  
49  
50  
51  
52  
53  
54  
55  
56  
57  
58  
59  
60

1  
2  
3 were 328, median 1.0, minimum 0, maximum 94, IQR 2.75. No correlations were  
4  
5 found between the number of citations and the Journal Impact Factor (JIF) (Pearson  
6  
7 correlation ( $r = 0.186$ ;  $p=0.196$ ), the number of authors ( $r =0.061$ ;  $p= 0.674$ ), number  
8  
9 of females in authorship ( $r =0.064$ ;  $p= 0.661$ ), the number of institutes involved ( $r$   
10  
11  $=0.076$ ;  $p= 0.602$ ), the number of countries involved ( $r =0.101$ ;  $p= 0.483$ ), and the  
12  
13 number of grants received ( $r= - 0.015$ ;  $p=0.915$ ).  
14  
15

### 16 17 18 **Level of Evidence**

19  
20  
21 Table 5 summarizes the grading of articles according to the Oxford Center for  
22  
23 evidence-based medicine. The table shows that most articles were graded at levels  
24  
25 1b and 3a and 3b evidence (12 papers had level 1b evidence, 9 papers at level 3a,  
26  
27 and 15 papers had level 3b evidence). Five articles had a level of evidence of 4 and  
28  
29 no article at level 5. The remaining articles were at levels 1a, 2a, 2b and 2c. The  
30  
31 overall agreement between the evaluators was acceptable; Fleiss kappa= 0.8252;  
32  
33 95% CI 0.79-0.85.  
34  
35

### 36 37 38 **DISCUSSION**

39  
40  
41 This study aimed at identifying the characteristics of the top 50 most frequently cited  
42  
43 papers in IBD and assessing the quality of evidence provided. The papers covered a  
44  
45 number of key topics related to IBD including: epidemiology and prevalence,  
46  
47 pathogenesis and genetic susceptibility, animal models, clinical classification and  
48  
49 indices of disease activity, risks of developing colorectal cancer, extra-intestinal  
50  
51 complications, and use of infliximab, adalimumab, monoclonal antibodies and anti-  
52  
53 tumour necrosis factor, and 6- mercaptopurine in CD, and use of 5-aminosalicylic  
54  
55  
56  
57  
58  
59  
60

1  
2  
3 acid, corticosteroids, and cyclosporine in treating UC. While these topics cover key  
4 issues related to IBD, topics related to molecular biology, surgical management,  
5 patient education, nutritional aspects, radiological and other investigations were not  
6 represented in the top-cited articles list [70,71].  
7  
8  
9  
10  
11

12  
13 The assessment of the characteristics of the top 50 highly cited articles identified in  
14 this study reveals the following:  
15  
16

17  
18 First, the lack of correlations between the number of citations and the number of  
19 years since publication may indicate that the high-citations is not caused by ageing of  
20 these articles. In fact, only 15 articles (30%) were published in the period from 1955  
21 to 1994 (39 years), while the majority, 35 (70%) were published in the last 17 years.  
22  
23 No papers were published after 2012. This article also shows that the mean number  
24 of citations of articles published before the year 2000 were much lower than those of  
25 articles after the year 2000. This may be related to the tendency of researchers to cite  
26 recently published research and new findings [72] and papers that they have read  
27 [18]. Also the number of citations and the papers' age might be attributed to the  
28 changes in citation behaviour over time. For example, in the 50s and 60s, the authors  
29 used to cite fewer papers compared to what was practiced over the last 20 years [73].  
30  
31 The higher citations have been found to be the strongest predictor of current online  
32 availability after a long time since publication. Therefore, the higher citation could be  
33 a protective mechanism for continued availability of a publication despite aging and  
34 hence continuing citation [74].  
35  
36  
37  
38  
39  
40  
41  
42  
43  
44  
45  
46  
47  
48  
49  
50  
51  
52  
53  
54  
55  
56  
57  
58  
59  
60



1  
2  
3 Second, the lack of a correlation between the number of citations and the Journal  
4 Impact Factor (JIF). The JIF has been widely used in ranking and evaluating journals.  
5  
6 It stands as a proxy for the relative importance of a journal with its field [75]. Although  
7  
8 the top-cited articles identified were published in journals with high impact factors, the  
9  
10 impact factors of some journals were not necessarily the highest in their fields. For  
11  
12 example, *Laboratory Investigation*, *Canadian Journal of Gastroenterology and*  
13  
14 *Hepatology*, *Medicine (Baltimore)*, and *Journal of Immunology* had JIFs in the range  
15  
16 of 1.804 to 4.857. With this information in mind one may postulate that the high JIF is  
17  
18 not necessarily related to the higher citation numbers received. Two recent works  
19  
20 showed that the JIF is not an accurate indicator of citations an average article  
21  
22 receives, articles published in low impact factor journals can still be highly cited and  
23  
24 vice versa [76,77].  
25  
26  
27  
28  
29  
30

31 Third, the study showed negative correlation between the number of citations and the  
32  
33 number of authors, the number of female authors, or the number of institutes. The  
34  
35 number of authors and females in authorship varied from one to 106 and from zero to  
36  
37 20, respectively. Also the number of institutes involved varied from one to 88. The  
38  
39 question that can be raised in this regards; are we expecting an increase in number  
40  
41 of citations as the number of authors or the number institutes involved increased?  
42  
43 The work of Garcia-Aroca et al [78] shows that collaboration between authors  
44  
45 increases their impact and increases citation rates. However, they showed that  
46  
47 publishing in English in certain journals and collaborating with certain authors and  
48  
49 institutes increase the visibility of the manuscripts published on the subject. Hence it  
50  
51 is the quality of collaboration rather than the absolute number of these parameters.  
52  
53  
54  
55  
56  
57  
58  
59  
60

1  
2  
3 Recently Tanner-Smith and Polanin showed that studies conducted by more  
4 established authors (have higher h-indices) and reported in more prestigious journal  
5 outlets are more likely to be cited by other scholars, even after controlling for various  
6 proxies of study quality [79].  
7  
8  
9  
10

11  
12  
13 Although the proportion of women in authorship of original research in the United  
14 States in general has significantly increased in the last four decades, women still  
15 compose a minority of the authors of original research [80]. In the field of  
16 gastroenterology, the percentage of the United States female physician authors of  
17 original research in the field has relatively increased over time, yet the senior author  
18 position remains lower than expected [81,82].  
19  
20  
21  
22  
23  
24  
25  
26  
27

28 Fourth, the study showed no correlation between the number of citations and the  
29 number of funds/grants received. This finding is not surprising. Recently it was shown  
30 that too many of the United States authors of most influential papers in science do not  
31 receive NH funding [83]. Another group of researchers found no association between  
32 grant percentile ranking and grant outcome as assessed by number of top-10%  
33 articles per dollar million spent [84].  
34  
35  
36  
37  
38  
39  
40  
41

42 The United States, the United Kingdom, Germany, France, Belgium, and Canada  
43 contributed to the majority of these articles. The leadership of universities from these  
44 countries in gastrointestinal research particularly IBD is no surprise, top universities  
45 identified from this study were Massachusetts General Hospital and Harvard Medical  
46 School, Boston, Massachusetts, the United States, Mount Sinai School of Medicine,  
47 New York, the United States, Mayo Clinic, Rochester, Minnesota, the United States,  
48  
49  
50  
51  
52  
53  
54  
55  
56  
57  
58  
59  
60

1  
2  
3 Cedars-Sinai Medical Center, Los Angeles, California, the United States, University of  
4  
5 Chicago Medical Center, Chicago, Illinois, the United States. Other institutes and  
6  
7 research centres that had lead these studies are shown in Appendix 1.  
8  
9

10  
11 All articles were published in the English language. The most productive journals  
12  
13 were the *New England Journal of Medicine*, and *Gastroenterology* with a total of 24  
14  
15 articles. Others were *Nature*, *Nature Genetics*, *the Lancet*, and *Proceedings of the*  
16  
17 *National Academy of Sciences of the United States of America*, *Cell*, *Gut*, *British*  
18  
19 *Medical Journal*, *Science*, and *Nature Reviews Immunology* making a total of 20  
20  
21 articles. While these journals have a relatively high JIF, other journals published one  
22  
23 article each and had a relatively low JIF compared to journals included in their  
24  
25 categories. For example, *Human Pathology* listed number 22 under the category of  
26  
27 Pathology, and *Canadian Journal of Gastroenterology and Hepatology*, listed number  
28  
29 74 under the category Gastroenterology and Hepatology. The high level of evidence  
30  
31 as outlined in the top-cited articles could be an important contributing factor to the  
32  
33 higher number of citations received by these articles [85].  
34  
35  
36  
37  
38

39 After the submission of our study we came across the study by Connelly et al [86] on  
40  
41 top 100 articles on IBD. While they indicated that their findings covered the period  
42  
43 between 1955-2012 which is consistent with our findings, our study has examined a  
44  
45 range of parameters including correlation of citation numbers with JIF, number of  
46  
47 years since publication, number of authors, females in authorship, institutes, and  
48  
49 number of countries and grants, which were not addressed by Connelly's work. Also  
50  
51 we have examined the level of evidence of highly cited articles.  
52  
53  
54  
55  
56  
57  
58  
59  
60

## CONCLUSIONS

Our list of top-cited articles in IBD highlights key contributions that based the foundation of research and examination of different aspects of the disease over 57 years. This scholarly contribution came from universities and research centres in the United States, the United Kingdom, Germany, France, Belgium and Canada. The findings may be consistent with the concept that it is not the absolute number of collaborators that makes an impact on the citation number or the influence of a publication but rather the quality of such collaboration with regard to the researchers involved, their institutes, and the ongoing contribution to the advances of research. The relatively small number of females in the authorship reflects the gender gap and the fact that women still compose a minority of the authors of original research and reviews in gastroenterology. The higher level of evidence demonstrated in most top-cited articles may have contributed to the higher number of citations received by these articles.

1  
2  
3 **Acknowledgement:** The author would like to thank Diana Sanad for her assistance  
4  
5 and reviewing the manuscript.  
6  
7

8  
9 **Funding support:** This work was funded by the College of Medicine, Research  
10  
11 Center Deanship of Scientific Research, King Saud University, Riyadh, Saudi Arabia.  
12  
13

14 **Ethical approval:** Not applicable to this study.  
15

16  
17 **Contributorship Statement:** SAA and SA shared equally the different roles and  
18  
19 responsibilities to complete the submitted article including, the research idea, the  
20  
21 search of databases, the evaluation of data collected, the statistical analysis, the  
22  
23 interpretation of findings, the creation of tables and figures, writing the manuscript  
24  
25 and the approved the final version of the manuscript.  
26  
27

28  
29 **Competing interests:** There are no competing interests for any author  
30

31  
32 **Provenance and peer review:** Not commissioned; externally peer reviewed  
33

34  
35 **Data sharing:** No further data available to share  
36  
37  
38  
39  
40  
41  
42  
43  
44  
45  
46  
47  
48  
49  
50  
51  
52  
53  
54  
55  
56  
57  
58  
59  
60

---

## REFERENCES

1. MacMaster FP, Swansburg R, Rittenbach K. Academic Productivity in Psychiatry: Benchmarks for the H-Index. *Acad Psychiatry*. 2017 Apr 18. [Epub ahead of print]
2. Susarla HK, Dhar V, Karimbux NY, Tinanoff N. Do Standard Bibliometric Measures Correlate with Academic Rank of Full-Time Pediatric Dentistry Faculty Members? *J Dent Educ*. 2017 Apr;81(4):427-432.
3. Milone MT, Bernstein J. On Track to Professorship? A Bibliometric Analysis of Early Scholarly Output. *Am J Orthop (Belle Mead NJ)*. 2016 Mar-Apr;45(3):E119-23.
4. Azer SA, Holen A, Wilson I, Skokauskas N. Impact factor of medical education journals and recently developed indices: Can any of them support academic promotion criteria? *J Postgrad Med*. 2016 Jan-Mar;62(1):32-39. doi: 10.4103/0022-3859.173202.
5. Jones AW. Impact of JAT publications 1981-2003: the most prolific authors and the most highly cited articles. *J Anal Toxicol*. 2004 Oct;28(7):541-545.
6. Patsopoulos NA, Ioannidis JP, Analatos AA. Origin and funding of the most frequently cited papers in medicine: database analysis. *BMJ* 2006;332:1061–1064.
7. Garfield E. Fortnightly review: how can impact factors be improved? *BMJ* 1996;313:411–413.
8. Azer SA. Exploring the Top-Cited and Most Influential Articles in Medical Education. *J Contin Educ Health Prof*. 2016 Summer;36 Suppl 1:S32-41.
9. Wilks S. Morbid appearances in the intestines of Miss Bankes. *Med Times Gazette* 1859;2:264-265.
10. Crohn BB, Ginzburg L, Oppenheimer GD. Regional ileitis: a pathologic and clinical entity. *JAMA* 1932;99:1323-1329.
11. Van Noorden R, Maher B, Nuzzo R. The top 100 papers. *Nature*. 2014;514(7524):550.

- 1  
2  
3  
4 12. Kulkarni AV, Aziz B, Shams I, Busse JW. Comparisons of citations in Web of  
5 Science, Scopus, and Google Scholar for articles published in general medical  
6 journals. *JAMA*. 2009 Sep 9;302(10):1092-1096.  
7
- 8 13. Powell AGMT, Bevan V, Brown C, Lewis WG. Altmetric Versus Bibliometric  
9 Perspective Regarding Publication Impact and Force. *World J Surg*. 2018 Mar 13.  
10  
11  
12
- 13 14. Yi F, Ma J, Ni W, Chang R, Liu W, Han X, Pan D, Liu X, Qiu J. The top  
14 cited articles on glioma stem cells in Web of Science. *Neural Regen Res*. 2013 May  
15 25;8(15):1431-8. doi: 10.3969/j.issn.1673-5374.2013.15.011.  
16
- 17 15. Mu Y, Li N, Guan L, Wang C, Shang S, Wang Y. Therapies for children with  
18 cerebral palsy: A Web of Science-based literature analysis. *Neural Regen Res*. 2012  
19 Nov 25;7(33):2632-9. doi: 10.3969/j.issn.1673-5374.2012.33.009.  
20  
21
- 22 16. Azer SA. Top-Cited Articles in Problem-Based Learning: A Bibliometric Analysis  
23 and Quality of Evidence Assessment. *J Dent Educ*. 2017 Apr;81(4):458-478.  
24  
25
- 26 17. Oxford Centre for Evidence-based Medicine – Levels of Evidence (March 2009).  
27 Available at: [http://www.cebm.net/oxford-centre-evidence-based-medicine-levels-](http://www.cebm.net/oxford-centre-evidence-based-medicine-levels-evidence-march-2009)  
28 [evidence-march-2009](http://www.cebm.net/oxford-centre-evidence-based-medicine-levels-evidence-march-2009) [Accessed 20 May 2017].  
29  
30
- 31 18. Azer SA. The top-cited articles in medical education: a bibliometric analysis. *Acad*  
32 *Med* 2015;90(8):1147-1161.  
33  
34  
35
- 36 19. D'Antiga L, Betalli P, De Angelis P, et al. Interobserver agreement on endoscopic  
37 classification of oesophageal varices in children. *J Pediatr Gastroenterol Nutr*  
38 2015;61(2):176-181.  
39  
40
- 41 20. Hugot JP, Chamaillard M, Zouali H, Lesage S, Cézard JP, Belaiche J, Almer S,  
42 Tysk C, O'Morain CA, Gassull M, Binder V, Finkel Y, Cortot A, Modigliani R, Laurent-  
43 Puig P, Gower-Rousseau C, Macry J, Colombel JF, Sahbatou M, Thomas G.  
44 Association of NOD2 leucine-rich repeat variants with susceptibility to Crohn's  
45 disease. *Nature*. 2001 May 31;411(6837):599-603.  
46  
47
- 48 21. Ogura Y, Bonen DK, Inohara N, Nicolae DL, Chen FF, Ramos R, Britton H, Moran  
49 T, Karaliuskas R, Duerr RH, Achkar JP, Brant SR, Bayless TM, Kirschner BS,  
50 Hanauer SB, Nuñez G, Cho JH. A frameshift mutation in NOD2 associated with  
51 susceptibility to Crohn's disease. *Nature*. 2001 May 31;411(6837):603-6.  
52  
53
- 54 22. Kühn R, Löhler J, Rennick D, Rajewsky K, Müller W. Interleukin-10-deficient mice  
55 develop chronic enterocolitis. *Cell*. 1993 Oct 22;75(2):263-74  
56  
57  
58  
59  
60

- 1  
2  
3 23. Best WR, Becktel JM, Singleton JW, Kern F Jr. Development of a Crohn's  
4 disease activity index. National Cooperative Crohn's Disease Study.  
5 Gastroenterology. 1976 Mar;70(3):439-44.  
6  
7  
8 24. Hanauer SB, Feagan BG, Lichtenstein GR, Mayer LF, Schreiber S, Colombel JF,  
9 Rachmilewitz D, Wolf DC, Olson A, Bao W, Rutgeerts P; ACCENT I Study Group.  
10 Maintenance infliximab for Crohn's disease: the ACCENT I randomised trial. Lancet.  
11 2002 May 4;359(9317):1541-1549.  
12  
13 25. Podolsky DK. Inflammatory bowel disease. N Engl J Med. 2002 Aug  
14 8;347(6):417-429.  
15  
16  
17 26. Targan SR, Hanauer SB, van Deventer SJ, Mayer L, Present DH, Braakman T,  
18 DeWoody KL, Schaible TF, Rutgeerts PJ. A short-term study of chimeric monoclonal  
19 antibody cA2 to tumor necrosis factor alpha for Crohn's disease. Crohn's Disease  
20 cA2 Study Group. N Engl J Med. 1997 Oct 9;337(15):1029-35.  
21  
22  
23  
24 27. Xavier RJ, Podolsky DK. Unravelling the pathogenesis of inflammatory bowel  
25 disease. Nature. 2007 Jul 26;448(7152):427-434.  
26  
27  
28 28. Truelove SC and Witts LJ. Cortisone in ulcerative colitis; final report on a  
29 therapeutic trial. Br Med J. 1955 Oct 29;2(4947):1041-1048.  
30  
31  
32 29. Duerr RH, Taylor KD, Brant SR, Rioux JD, Silverberg MS, Daly MJ, Steinhart AH,  
33 Abraham C, Regueiro M, Griffiths A, Dassopoulos T, Bitton A, Yang H, Targan S,  
34 Datta LW, Kistner EO, Schumm LP, Lee AT, Gregersen PK, Barmada MM, Rotter JI,  
35 Nicolae DL, Cho JH. A genome-wide association study identifies IL23R as an  
36 inflammatory bowel disease gene. Science. 2006 Dec 1;314(5804):1461-1463.  
37  
38  
39 30. Rutgeerts P, Sandborn WJ, Feagan BG, Reinisch W, Olson A, Johanns J,  
40 Travers S, Rachmilewitz D, Hanauer SB, Lichtenstein GR, de Villiers WJ, Present D,  
41 Sands BE, Colombel JF. Infliximab for induction and maintenance therapy for  
42 ulcerative colitis. N Engl J Med. 2005 Dec 8;353(23):2462-76.  
43  
44  
45 31. Present DH, Rutgeerts P, Targan S, Hanauer SB, Mayer L, van Hogezaand RA,  
46 Podolsky DK, Sands BE, Braakman T, DeWoody KL, Schaible TF, van Deventer SJ.  
47 Infliximab for the treatment of fistulas in patients with Crohn's disease. N Engl J Med.  
48 1999 May 6;340(18):1398-405.  
49  
50  
51 32. Frank DN, St Amand AL, Feldman RA, Boedeker EC, Harpaz N, Pace NR.  
52 Molecular-phylogenetic characterization of microbial community imbalances in human  
53 inflammatory bowel diseases. Proc Natl Acad Sci U S A. 2007 Aug  
54 21;104(34):13780-13785  
55  
56 33. Jostins L, Ripke S, Weersma RK, Duerr RH, McGovern DP, Hui KY, Lee JC,



1  
2  
3 Schumm LP, Sharma Y, Anderson CA, Essers J, Mitrovic M, Ning K, Cleynen I,  
4 Theatre E, Spain SL, Raychaudhuri S, Goyette P, Wei Z, Abraham C, Achkar JP,  
5 Ahmad T, Amininejad L, Ananthakrishnan AN, Andersen V, Andrews JM, Baidoo L,  
6 Balschun T, Bampton PA, Bitton A, Boucher G, Brand S, Büning C, Cohain A, Cichon  
7 S, D'Amato M, De Jong D, Devaney KL, Dubinsky M, Edwards C, Ellinghaus D,  
8 Ferguson LR, Franchimont D, Fransen K, Garry R, Georges M, Gieger C, Glas J,  
9 Ferguson LR, Franchimont D, Fransen K, Garry R, Georges M, Gieger C, Glas J,  
10 Haritunians T, Hart A, Hawkey C, Hedl M, Hu X, Karlsen TH, Kupcinskis L,  
11 Kugathasan S, Latiano A, Laukens D, Lawrance IC, Lees CW, Louis E, Mahy G,  
12 Mansfield J, Morgan AR, Mowat C, Newman W, Palmieri O, Ponsioen CY, Potocnik  
13 U, Prescott NJ, Regueiro M, Rotter JI, Russell RK, Sanderson JD, Sans M, Satsangi  
14 J, Schreiber S, Simms LA, Sventoraityte J, Targan SR, Taylor KD, Tremelling M,  
15 Verspaget HW, De Vos M, Wijmenga C, Wilson DC, Winkelmann J, Xavier RJ,  
16 Zeissig S, Zhang B, Zhang CK, Zhao H; International IBD Genetics Consortium  
17 (IIBDGC)., Silverberg MS, Annese V, Hakonarson H, Brant SR, Radford-Smith G,  
18 Mathew CG, Rioux JD, Schadt EE, Daly MJ, Franke A, Parkes M, Vermeire S, Barrett  
19 JC, Cho JH. Host-microbe interactions have shaped the genetic architecture of  
20 inflammatory bowel disease. *Nature*. 2012 Nov 1;491(7422):119-24.  
21  
22

23  
24 34. Barrett JC, Hansoul S, Nicolae DL, Cho JH, Duerr RH, Rioux JD, Brant SR,  
25 Silverberg MS, Taylor KD, Barmada MM, Bitton A, Dassopoulos T, Datta LW, Green  
26 T, Griffiths AM, Kistner EO, Murtha MT, Regueiro MD, Rotter JI, Schumm LP,  
27 Steinhart AH, Targan SR, Xavier RJ; NIDDK IBD Genetics Consortium, Libioulle C,  
28 Sandor C, Lathrop M, Belaiche J, Dewit O, Gut I, Heath S, Laukens D, Mni M,  
29 Rutgeerts P, Van Gossum A, Zelenika D, Franchimont D, Hugot JP, de Vos M,  
30 Vermeire S, Louis E; Belgian-French IBD Consortium; Wellcome Trust Case Control  
31 Consortium, Cardon LR, Anderson CA, Drummond H, Nimmo E, Ahmad T, Prescott  
32 NJ, Onnie CM, Fisher SA, Marchini J, Ghorji J, Bumpstead S, Gwilliam R, Tremelling  
33 M, Deloukas P, Mansfield J, Jewell D, Satsangi J, Mathew CG, Parkes M, Georges  
34 M, Daly MJ. Genome-wide association defines more than 30 distinct susceptibility loci  
35 for Crohn's disease. *Nat Genet*. 2008 Aug;40(8):955-962.  
36  
37

38  
39 35. Loftus EV Jr. Clinical epidemiology of inflammatory bowel disease: Incidence,  
40 prevalence, and environmental influences. *Gastroenterology*. 2004 May;126(6):1504-  
41 1517.  
42

43  
44 36. Fiocchi C. Inflammatory bowel disease: etiology and pathogenesis.  
45 *Gastroenterology*. 1998 Jul;115(1):182-205.  
46

47  
48 37. Harvey RF, Bradshaw JM. A simple index of Crohn's-disease activity. *Lancet*.  
49 1980 Mar 8;1(8167):514.  
50

51  
52 38. Molodecky NA, Soon IS, Rabi DM, Ghali WA, Ferris M, Chernoff G, Benchimol EI,  
53 Panaccione R, Ghosh S, Barkema HW, Kaplan GG. Increasing incidence and  
54 prevalence of the inflammatory bowel diseases with time, based on systematic  
55 review. *Gastroenterology*. 2012 Jan;142(1):46-54.  
56  
57  
58  
59  
60

1  
2  
3 39. Riddell RH, Goldman H, Ransohoff DF, Appelman HD, Fenoglio CM, Haggitt RC,  
4 Ahren C, Correa P, Hamilton SR, Morson BC, et al. Dysplasia in inflammatory bowel  
5 disease: standardized classification with provisional clinical applications. *Hum Pathol*.  
6 1983 Nov;14(11):931-968.  
7

8  
9  
10 40. Okayasu I, Hatakeyama S, Yamada M, Ohkusa T, Inagaki Y, Nakaya R A novel  
11 method in the induction of reliable experimental acute and chronic ulcerative colitis in  
12 mice. *Gastroenterology*. 1990 Mar;98(3):694-702.  
13

14  
15  
16 41. Eaden JA, Abrams KR, Mayberry JF. The risk of colorectal cancer in ulcerative  
17 colitis: a meta-analysis. *Gut*. 2001 Apr;48(4):526-535.  
18

19  
20 42. Sokol H, Pigneur B, Watterlot L, Lakhdari O, Bermúdez-Humarán LG, Gratadoux  
21 JJ, Blugeon S, Bridonneau C, Furet JP, Corthier G, Grangette C, Vasquez N, Pochart  
22 P, Trugnan G, Thomas G, Blottière HM, Doré J, Marteau P, Seksik P, Langella P.  
23 *Faecalibacterium prausnitzii* is an anti-inflammatory commensal bacterium identified  
24 by gut microbiota analysis of Crohn disease patients. *Proc Natl Acad Sci U S A*. 2008  
25 Oct 28;105(43):16731-16736.  
26

27  
28 43. Silverberg MS, Satsangi J, Ahmad T, Arnott ID, Bernstein CN, Brant SR, Caprilli  
29 R, Colombel JF, Gasche C, Geboes K, Jewell DP, Karban A, Loftus EV Jr, Peña AS,  
30 Riddell RH, Sachar DB, Schreiber S, Steinhardt AH, Targan SR, Vermeire S, Warren  
31 BF. Toward an integrated clinical, molecular and serological classification of  
32 inflammatory bowel disease: report of a Working Party of the 2005 Montreal World  
33 Congress of Gastroenterology. *Can J Gastroenterol*. 2005 Sep;19 Suppl A:5A-36A  
34

35  
36 44. Sadlack B, Merz H, Schorle H, Schimpl A, Feller AC, Horak I. Ulcerative colitis-  
37 like disease in mice with a disrupted interleukin-2 gene. *Cell*. 1993 Oct 22;75(2):253-  
38 261.  
39

40  
41 45. Franke A, McGovern DP, Barrett JC, Wang K, Radford-Smith GL, Ahmad T, Lees  
42 CW, Balschun T, Lee J, Roberts R, Anderson CA, Bis JC, Bumpstead S, Ellinghaus  
43 D, Festen EM, Georges M, Green T, Haritunians T, Jostins L, Latiano A, Mathew CG,  
44 Montgomery GW, Prescott NJ, Raychaudhuri S, Rotter JI, Schumm P, Sharma Y,  
45 Simms LA, Taylor KD, Whiteman D, Wijmenga C, Baldassano RN, Barclay M,  
46 Bayless TM, Brand S, Büning C, Cohen A, Colombel JF, Cottone M, Stronati L,  
47 Denson T, De Vos M, D'Inca R, Dubinsky M, Edwards C, Florin T, Franchimont D,  
48 Geary R, Glas J, Van Gossom A, Guthery SL, Halfvarson J, Verspaget HW, Hugot  
49 JP, Karban A, Laukens D, Lawrance I, Lemann M, Levine A, Libioulle C, Louis E,  
50 Mowat C, Newman W, Panés J, Phillips A, Proctor DD, Regueiro M, Russell R,  
51 Rutgeerts P, Sanderson J, Sans M, Seibold F, Steinhardt AH, Stokkers PC, Torkvist L,  
52 Kullak-Ublick G, Wilson D, Walters T, Targan SR, Brant SR, Rioux JD, D'Amato M,  
53 Weersma RK, Kugathasan S, Griffiths AM, Mansfield JC, Vermeire S, Duerr RH,  
54 Silverberg MS, Satsangi J, Schreiber S, Cho JH, Annese V, Hakonarson H, Daly MJ,  
55 Parkes M. Genome-wide meta-analysis increases to 71 the number of confirmed  
56  
57  
58  
59  
60

1  
2  
3 Crohn's disease susceptibility loci. *Nat Genet.* 2010 Dec;42(12):1118-1125.  
4

5  
6 46. Baert F, Noman M, Vermeire S, Van Assche G, D' Haens G, Carbonez A,  
7 Rutgeerts P. Influence of immunogenicity on the long-term efficacy of infliximab in  
8 Crohn's disease. *N Engl J Med.* 2003 Feb 13;348(7):601-608.  
9

10  
11 47. Colombel JF, Sandborn WJ, Reinisch W, Mantzaris GJ, Kornbluth A,  
12 Rachmilewitz D, Lichtiger S, D'Haens G, Diamond RH, Broussard DL, Tang KL, van  
13 der Woude CJ, Rutgeerts P; SONIC Study Group. Infliximab, azathioprine, or  
14 combination therapy for Crohn's disease. *N Engl J Med.* 2010 Apr 15;362(15):1383-  
15 1395.  
16

17  
18 48. Cooper HS, Murthy SN, Shah RS, Sedergran DJ. Clinicopathologic study of  
19 dextran sulfate sodium experimental murine colitis. *Lab Invest.* 1993 Aug;69(2):238-  
20 249.  
21

22  
23 49. Ekobom A, Helmick C, Zack M, Adami HO. Ulcerative colitis and colorectal cancer.  
24 A population-based study. *N Engl J Med.* 1990 Nov 1;323(18):1228-1233.  
25

26  
27 50. Schroeder KW, Tremaine WJ, Ilstrup DM. Coated oral 5-aminosalicylic acid  
28 therapy for mildly to moderately active ulcerative colitis. A randomized study. *N Engl J*  
29 *Med.* 1987 Dec 24;317(26):1625-1629.  
30

31  
32 51. Rioux JD, Xavier RJ, Taylor KD, Silverberg MS, Goyette P, Huett A, Green T,  
33 Kuballa P, Barmada MM, Datta LW, Shugart YY, Griffiths AM, Targan SR, Ippoliti AF,  
34 Bernard EJ, Mei L, Nicolae DL, Regueiro M, Schumm LP, Steinhart AH, Rotter JI,  
35 Duerr RH, Cho JH, Daly MJ, Brant SR. Genome-wide association study identifies  
36 new susceptibility loci for Crohn disease and implicates autophagy in disease  
37 pathogenesis. *Nat Genet.* 2007 May;39(5):596-604.  
38

39  
40 52. Sands BE, Anderson FH, Bernstein CN, Chey WY, Feagan BG, Fedorak RN,  
41 Kamm MA, Korzenik JR, Lashner BA, Onken JE, Rachmilewitz D, Rutgeerts P, Wild  
42 G, Wolf DC, Marsters PA, Travers SB, Blank MA, van Deventer SJ. Infliximab  
43 maintenance therapy for fistulizing Crohn's disease. *N Engl J Med.* 2004 Feb  
44 26;350(9):876-85.  
45

46  
47 53. Colombel JF, Sandborn WJ, Rutgeerts P, Enns R, Hanauer SB, Panaccione R,  
48 Schreiber S, Byczkowski D, Li J, Kent JD, Pollack PF. Adalimumab for maintenance  
49 of clinical response and remission in patients with Crohn's disease: the CHARM trial.  
50 *Gastroenterology.* 2007 Jan;132(1):52-65.  
51

52  
53 54. Hampe J, Franke A, Rosenstiel P, Till A, Teuber M, Huse K, Albrecht M, Mayr G,  
54 De La Vega FM, Briggs J, Günther S, Prescott NJ, Onnie CM, Häsler R, Sipos B,  
55 Fölsch UR, Lengauer T, Platzer M, Mathew CG, Krawczak M, Schreiber S. A  
56 genome-wide association scan of nonsynonymous SNPs identifies a susceptibility  
57 variant for Crohn disease in ATG16L1. *Nat Genet.* 2007 Feb;39(2):207-211.  
58  
59  
60

- 1  
2  
3  
4 55. Bouma G, Strober W. The immunological and genetic basis of inflammatory  
5 bowel disease. *Nat Rev Immunol*. 2003 Jul;3(7):521-533.  
6  
7  
8 56. Lichtiger S, Present DH, Kornbluth A, Gelernt I, Bauer J, Galler G, Michelassi F,  
9 Hanauer S. Cyclosporine in severe ulcerative colitis refractory to steroid therapy. *N*  
10 *Engl J Med*. 1994 Jun 30;330(26):1841-1845.  
11  
12 57. Abraham C, Cho JH. Inflammatory bowel disease. *N Engl J Med*. 2009 Nov  
13 19;361(21):2066-2078.  
14  
15  
16  
17 58. Summers RW, Switz DM, Sessions JT Jr, Bechtel JM, Best WR, Kern F Jr,  
18 Singleton JW. National Cooperative Crohn's Disease Study: results of drug treatment.  
19 *Gastroenterology*. 1979 Oct;77(4 Pt 2):847-869  
20  
21  
22  
23 59. Satsangi J, Silverberg MS, Vermeire S, Colombel JF. The Montreal classification  
24 of inflammatory bowel disease: controversies, consensus, and implications.  
25 *Gut*. 2006 Jun;55(6):749-53.  
26  
27  
28  
29 60. Elson CO, Sartor RB, Tennyson GS, Riddell RH. Experimental models of  
30 inflammatory bowel disease. *Gastroenterology*. 1995 Oct;109(4):1344-1367.  
31  
32  
33 61. Greenstein AJ, Janowitz HD, Sachar DB. The extra-intestinal complications of  
34 Crohn's disease and ulcerative colitis: a study of 700 patients. *Medicine (Baltimore)*.  
35 1976 Sep;55(5):401-412.  
36  
37 62. Fujino S, Andoh A, Bamba S, Ogawa A, Hata K, Araki Y, Bamba T, Fujiyama Y.  
38 Increased expression of interleukin 17 in inflammatory bowel disease. *Gut*. 2003  
39 Jan;52(1):65-70.  
40  
41  
42 63. Sartor RB. Microbial influences in inflammatory bowel diseases.  
43 *Gastroenterology*. 2008 Feb;134(2):577-594.  
44  
45  
46  
47 64. Manichanh C, Rigottier-Gois L, Bonnaud E, Gloux K, Pelletier E, Frangeul L,  
48 Nalin R, Jarrin C, Chardon P, Marteau P, Roca J, Dore J.  
49 Reduced diversity of faecal microbiota in Crohn's disease revealed by a  
50 metagenomic approach. *Gut*. 2006 Feb;55(2):205-211.  
51  
52  
53 65. Fuss IJ, Neurath M, Boirivant M, Klein JS, de la Motte C, Strong SA, Fiocchi C,  
54 Strober W. Disparate CD4+ lamina propria (LP) lymphokine secretion profiles in  
55 inflammatory bowel disease. Crohn's disease LP cells manifest increased secretion  
56 of IFN-gamma, whereas ulcerative colitis LP cells manifest increased secretion of IL-  
57  
58  
59  
60

1  
2  
3 5. J Immunol. 1996 Aug 1;157(3):1261-1270.  
4  
5

6  
7 66. Rutgeerts P, Geboes K, Vantrappen G, Beyls J, Kerremans R, Hiele M.  
8 Predictability of the postoperative course of Crohn's disease.  
9 Gastroenterology. 1990 Oct;99(4):956-963.  
10

11  
12 67. Present DH, Korelitz BI, Wisch N, Glass JL, Sachar DB, Pasternack BS.  
13 Treatment of Crohn's disease with 6-mercaptopurine. A long-term, randomized,  
14 double-blind study. N Engl J Med. 1980 May 1;302(18):981-987.  
15  
16

17  
18 68. Swidsinski A, Ladhoff A, Pernthaler A, Swidsinski S, Loening-Baucke V, Ortner M,  
19 Weber J, Hoffmann U, Schreiber S, Dietel M, Lochs H. Mucosal flora in inflammatory  
20 bowel disease. Gastroenterology. 2002 Jan;122(1):44-54.  
21  
22

23 69. van Dullemen HM, van Deventer SJ, Hommes DW, Bijl HA, Jansen J, Tytgat GN,  
24 Woody J. Treatment of Crohn's disease with anti-tumor necrosis factor chimeric  
25 monoclonal antibody (cA2). Gastroenterology. 1995 Jul;109(1):129-135.  
26  
27

28  
29 70. Azer SA. Overview of molecular pathways in inflammatory bowel disease  
30 associated with colorectal cancer development. Eur J Gastroenterol Hepatol. 2013  
31 Mar;25(3):271-281.  
32

33 71. Azer SA, AIOlayan TI, AIGhamdi MA, AISanea MA. Inflammatory bowel disease:  
34 An evaluation of health information on the internet. World J Gastroenterol. 2017 Mar  
35 7;23(9):1676-1696.  
36  
37

38  
39 72. Börner K, Maru JT, Goldstone RL. The simultaneous evolution of author and  
40 paper networks. Proc Natl Acad Sci U S A. 2004 Apr 6;101 Suppl 1:5266-73.  
41  
42

43 73 Sinatra R, Deville P, Szell M, Wang D, Barabasi AL. A century of  
44 physics. Nature Physics 2015; 11(10): 791-796.  
45  
46

47  
48  
49 74. Wren JD, Georgescu C, Giles CB, Hennessey J. Use it or lose it: citations predict  
50 the continued online availability of published bioinformatics resources. Nucleic Acids  
51 Res. 2017 Apr 20;45(7):3627-3633.  
52  
53

54 75. Shanahan DR. Auto-correlation of journal impact factor for consensus research  
55 reporting statements: a cohort study. PeerJ. 2016 Mar 31;4:e1887.  
56  
57  
58  
59  
60



- 1  
2  
3  
4 76. Royle P, Kandala NB, Barnard K, Waugh N. Bibliometrics of systematic reviews: analysis of citation rates and journal impact factors. *Syst Rev*. 2013 Sep 12;2:74.  
5  
6  
7  
8 77. Falagas ME, Kouranos VD, Michalopoulos A, Rodopoulou SP, Batsiou  
9 MA, Karageorgopoulos DE. Comparison of the distribution of citations received by  
10 articles published in high, moderate, and low impact factor journals in clinical  
11 medicine. *Intern Med J*. 2010 Aug;40(8):587-591.  
12  
13 78. García-Aroca MÁ, Pandiella-Dominique A, Navarro-Suay R, Alonso-Arroyo  
14 A, Granda-Orive JI, Anguita-Rodríguez F, López-García A. Analysis of Production,  
15 Impact, and Scientific Collaboration on Difficult Airway Through the Web of Science  
16 and Scopus (1981-2013). *Anesth Analg*. 2017 Jun;124(6):1886-1896.  
17  
18 79. Tanner-Smith EE, Polanin JR. Brief alcohol intervention trials conducted by higher  
19 prestige authors and published in higher impact factor journals are cited more  
20 frequently. *J Clin Epidemiol*. 2016 Feb 6.  
21  
22  
23 80. Jagsi R, Guancial EA, Worobey CC, Henault LE, Chang Y, Starr R, Tarbell  
24 NJ, Hylek EM. The "gender gap" in authorship of academic medical literature--a 35-  
25 year perspective. *N Engl J Med*. 2006 Jul 20;355(3):281-287.  
26  
27  
28 81. Long MT, Leszczynski A, Thompson KD, Wasan SK, Calderwood AH. Female  
29 authorship in major academic gastroenterology journals: a look over 20 years.  
30 *Gastrointest Endosc*. 2015;81(6):1440-1447.  
31  
32  
33 82. Diamond SJ, Thomas CR Jr, Desai S, Holliday EB, Jagsi R, Schmitt C, Enestvedt  
34 BK. Gender Differences in Publication Productivity, Academic Rank, and Career  
35 Duration Among U.S. Academic Gastroenterology Faculty. *Acad*  
36 *Med*. 2016 Aug;91(8):1158-1163.  
37  
38  
39 83. Nicholson JM, Ioannidis JP. Research grants: Conform and be funded. *Nature*.  
40 2012 Dec 6;492(7427):34-36.  
41  
42 84. Lauer MS, Danthi NS, Kaltman J, Wu C. Predicting Productivity Returns on  
43 Investment: Thirty Years of Peer Review, Grant Funding, and Publication of Highly  
44 Cited Papers at the National Heart, Lung, and Blood Institute. *Circ Res*. 2015 Jul  
45 17;117(3):239-243.  
46  
47  
48  
49 85. Cheng K, Dodson TB, Egbert MA, Susarla SM. Which Factors Affect Citation  
50 Rates in the Oral and Maxillofacial Surgery Literature? *J Oral Maxillofac*  
51 *Surg*. 2017 Apr 1. pii: S0278-2391(17)30361-0.  
52  
53  
54  
55  
56  
57  
58  
59  
60

1  
2  
3  
4  
5  
6  
7  
8  
9  
10  
11  
12  
13  
14  
15  
16  
17  
18  
19  
20  
21  
22  
23  
24  
25  
26  
27  
28  
29  
30  
31  
32  
33  
34  
35  
36  
37  
38  
39  
40  
41  
42  
43  
44  
45  
46  
47  
48  
49  
50  
51  
52  
53  
54  
55  
56  
57  
58  
59  
60

86. Connelly TM, Devane L, Kelly JC, Wrafter P, Messaris E. The 100 classic papers in ulcerative colitis: a bibliometric analysis. *Expert Rev Gastroenterol Hepatol.* 2016 Aug 22:1-9. [Epub ahead of print]

For peer review only

## Figure Legend

**Figure 1A:** Number of citations of papers published before the year 2000 (mean±SD)

**Figure 1B:** Number of citations of papers published after the year 2000 (mean±SD)

For peer review only



1  
2  
3  
4  
5  
6  
7  
8  
9  
10  
11  
12  
13  
14  
15  
16  
17  
18  
19  
20  
21  
22  
23  
24  
25  
26  
27  
28  
29  
30  
31  
32  
33  
34  
35  
36  
37  
38  
39  
40  
41  
42  
43  
44  
45  
46  
47

**Table 1** Top cited papers in inflammatory bowel disease identified by searching the Web of Science, summarized by year of publication and category

| Article type             | Year of publication: no of articles [References] |           |           |              |                             |                                    |                                    |           |
|--------------------------|--------------------------------------------------|-----------|-----------|--------------|-----------------------------|------------------------------------|------------------------------------|-----------|
|                          | 1950-1958                                        | 1959-1967 | 1968-1976 | 1977-1985    | 1986-1994                   | 1995-2003                          | 2004-2012                          | Total (%) |
| Article                  |                                                  |           |           | 1 [39]       |                             |                                    |                                    | 1 [2%]    |
| Review/<br>Meta-analysis |                                                  |           | 1 [61]    |              |                             | 5 [25,36,41,55,60]                 | 8 [27,34,35,45,33,57,38,63]        | 14 [28%]  |
| Report                   |                                                  |           |           |              |                             |                                    | 2 [43,59]                          | 2 [4%]    |
| Research                 | 1 [28]                                           |           | 1 [23]    | 3 [37,58,67] | 8 [22,44,40,48,49,56,50,66] | 10 [20,21,26,24,31,46,62,69,65,68] | 10 [29,30,32,51,52,42,54,47,53,64] | 33 [66%]  |
| Total (%)                | 1 [2%]                                           | 0 [0%]    | 2 [4%]    | 4 [8%]       | 8 [16%]                     | 15 [30%]                           | 20 [40%]                           | 50 [100%] |

**Table 2** Top-cited papers in inflammatory bowel disease (IBD) identified by searching the Web of Science, summarized by category and topic

| Topics on IBD                               | Category: no of articles [References] |                          |           |                             | Total (%) |
|---------------------------------------------|---------------------------------------|--------------------------|-----------|-----------------------------|-----------|
|                                             | Article                               | Review/<br>Meta-analysis | Report    | Research                    |           |
| Epidemiology, prevalence                    |                                       | 2 [35,38]                |           |                             | 2 [4%]    |
| CD genetic susceptibility and NOD2 mutation |                                       | 2 [34,45]                |           | 4 [20,21,51,54]             | 6 [12%]   |
| Animal models for IBD                       |                                       | 1 [60]                   |           | 4 [22,44,40,48]             | 5 [10%]   |
| Pathogenesis of IBD                         |                                       | 7 [25,27,36,55,33,57,63] |           | 8 [29,32,42,62,65,68,66,64] | 15 [30%]  |
| Classification, index of disease activity   | 1 [39]                                |                          | 2 [43,59] | 2 [23,37]                   | 5 [10%]   |
| Risk of developing colorectal cancer        |                                       | 1 [41]                   |           | 1 [49]                      | 2 [4%]    |
| Extra-intestinal complications              |                                       | 1 [61]                   |           |                             | 1 [2%]    |
| Infliximab in CD                            |                                       |                          |           | 6 [24,31,30,46,52,47]       | 6 [12%]   |
| Corticosteroids in UC                       |                                       |                          |           | 1 [28]                      | 1 [2%]    |
| Drug treatment and cyclosporine in UC       |                                       |                          |           | 2 [56,58]                   | 2 [4%]    |
| Adalimumab in CD                            |                                       |                          |           | 1 [53]                      | 1 [2%]    |
| 5-aminosalicylic acid in                    |                                       |                          |           | 1 [50]                      | 1 [2%]    |

1  
2  
3  
4  
5  
6  
7  
8  
9  
10  
11  
12  
13  
14  
15  
16  
17  
18  
19  
20  
21  
22  
23  
24  
25  
26  
27  
28  
29  
30  
31  
32  
33  
34  
35  
36  
37  
38  
39  
40  
41  
42  
43  
44  
45  
46  
47

|                                                         |        |          |        |           |           |
|---------------------------------------------------------|--------|----------|--------|-----------|-----------|
| UC                                                      |        |          |        |           |           |
| 6-mercaptopurine in CD                                  |        |          |        | 1 [67]    | 1 [2%]    |
| Monoclonal antibodies, anti-tumor necrosis factor in CD |        |          |        | 2 [26,69] | 2 [4%]    |
| Total (%)                                               | 1 [2%] | 14 [28%] | 2 [4%] | 33 [66%]  | 50 [100%] |

For peer review only

**Table 3.** The journals that published the top-cited inflammatory bowel disease (IBD) articles included in the study, the journal impact factor, and the number of papers published and reference number.

| Journal*                                                                               | 2016-Journal Impact Factor (JIF) | Number of papers published [References]  |
|----------------------------------------------------------------------------------------|----------------------------------|------------------------------------------|
| <i>New England Journal of Medicine</i>                                                 | 72.406                           | 12 [25,26,31,30,46,49,56,52,47,50,67,57] |
| <i>Gastroenterology</i>                                                                | 18.392                           | 12 [23,36,35,40,58,60,53,69,38,68,63,66] |
| <i>Nature</i>                                                                          | 40.137                           | 4 [20,21,27,33]                          |
| <i>Nature Genetics</i>                                                                 | 27.959                           | 4 [34,51,45,54]                          |
| <i>The Lancet</i>                                                                      | 47.831                           | 2 [24,37]                                |
| <i>Proceedings of the National Academy of Sciences of the United States of America</i> | 9.661                            | 2 [32,42]                                |
| <i>Cell</i>                                                                            | 30.410                           | 2 [22,44]                                |
| <i>Gut</i>                                                                             | 16.658                           | 4 [59,64,41,62]                          |
| <i>British Medical Journal</i>                                                         | 20.785                           | 1 [28]                                   |
| <i>Science</i>                                                                         | 37.205                           | 1 [29]                                   |
| <i>Human Pathology</i>                                                                 | 3.014                            | 1 [39]                                   |
| <i>Laboratory Investigation</i>                                                        | 4.857                            | 1 [48]                                   |
| <i>Canadian Journal of Gastroenterology and Hepatology</i>                             | 2.147                            | 1 [43]                                   |
| <i>Nature Reviews Immunology</i>                                                       | 39.932                           | 1 [55]                                   |
| <i>Medicine (Baltimore)</i>                                                            | 1.804                            | 1 [61]                                   |
| <i>Journal of Immunology</i>                                                           | 4.856                            | 1 [65]                                   |

- Gastroenterology related journals (Gastroenterology, and Gut) only published 16 (32%) articles out of the top highly cited 50 articles

**Table 4** Authors and co-authors of two or more articles of the top-cited articles in inflammatory bowel disease identified by searching the Web of Science

| Author's name* | Number [References] |                                | Author's Name* | Number [References] |                   |
|----------------|---------------------|--------------------------------|----------------|---------------------|-------------------|
|                | First author        | Coauthor                       |                | First author        | Coauthor          |
| Hugot, JP      | 1 [20]              | 2 [34,45]                      | Daly, MJ       | -                   | 5[29,34,51,45,33] |
| Podolsky, DK   | 1 [25]              | 3 [28,27,31]                   | Steinhart, AH  | -                   | 5[29,34,43,51,45] |
| Targan, SR     | 1 [26]              | 7 [29,31,34,43,51,45,33]       | Griffiths, A   | -                   | 4[29,34,51,45]    |
| Hanauer, SB    | 1 [24]              | 6 [21,26,31,30,56,53]          | Dassopoulos, T | -                   | 2[29,34]          |
| Xavier, RJ     | 1 [27]              | 3 [34,51,33]                   | Bitton, A      | -                   | 3[29,34,33]       |
| Duerr, RH      | 1 [29]              | 4 [21,34,45,33]                | Datta, LW      | -                   | 3[29,34,51]       |
| Present, DH    | 2 [31,67]           | 3 [26,30,56]                   | Kistner, EO    | -                   | 2[29,34]          |
| Rutgeerts, P   | 1 [30]              | 9 [26,24,31,34,46,45,52,47,53] | Rotter, JI     | -                   | 5[29,34,51,45,33] |
| Fiocchi, C     | 1 [36]              | 1 [65]                         | Schumm, LP     | -                   | 5[29,34,51,45,52] |
| Barrett, JC    | 1 [34]              | 2 [45,33]                      | Lee, J         | -                   | 2[45,33]          |
| Riddell, RH    | 1 [39]              | 2 [43,60]                      | Lees, CW       | -                   | 2[45,33]          |
| Loftus, EV Jr  | 1 [35]              | 1 [43]                         | Sandborn, WJ   | -                   | 3[30,47,53]       |
| Franke, A      | 1 [45]              | 2 [33,54]                      | Barmada, MM    | -                   | 3[29,34,51]       |
| Silverberg, MS | 1 [43]              | 5 [29,34,51,45,33]             | Nicolae, DL    | -                   | 4[21,29,34,51]    |
| Rioux, JD      | 1 [51]              | 4 [29,34,45,33]                | Sands, BE      | -                   | 3[31,30,52]       |
| Lichtiger, S   | 1 [56]              | 1 [47]                         | Belaiche, J    | -                   | 2[20,34]          |
| Colombel, JF   | 2 [47,53]           | 5 [20,24,30,43,45]             | Laukens, D     | -                   | 3[34,45,33]       |
| Abraham, C     | 1 [57]              | 2 [29,33]                      | Lawrance, I    | -                   | 2[45,33]          |
| Becktel, JM    | -                   | 2 [23,58]                      | Louis, E       | -                   | 3[34,33,45]       |

|                    |   |                          |               |   |                   |
|--------------------|---|--------------------------|---------------|---|-------------------|
| Singleton,JW       | - | 2 [23,58]                | Vos,M         | - | 3[34,45,33]       |
| Kern,F Jr          | - | 2 [23,58]                | Vermeire,S    | - | 5[34,46,43,45,33] |
| Van<br>Deventer,SJ | - | 4 [26,31,52,69]          | Satsangi,J    | - | 4[34,43,45,33]    |
| Mayer,L            | - | 3 [26,24,31]             | Bernstein,CN  | - | 2[43,52]          |
| Braakman,T         | - | 2 [26,31]                | Tremelling,M  | - | 2[34,33]          |
| DeWoody,KL         | - | 2 [26,31]                | Mansfield,J   | - | 3[34,45,33]       |
| Schaible,TF        | - | 2 [26,31]                | Jewell,D      | - | 2[34,43]          |
| Feagan,BG          | - | 3 [24,30,52]             | Mathew,CG     | - | 4[34,45,33,54]    |
| Lichtenstein,GR    | - | 2 [24,30]                | Parkes,M      | - | 3[34,45,33]       |
| Schreiber,S        | - | 7 [24,43,45,33,54,53,68] | Georges,M     | - | 3[34,45,33]       |
| Rachmilewitz,D     | - | 4 [24,30,52,47]          | Karban,A      | - | 2[43,45]          |
| Wolf,DC            | - | 2 [24,52]                | Gossum,A      | - | 2[34,45]          |
| Olson,A            | - | 2 [24,30]                | Franchimont,D | - | 3[34,45,33]       |
| Taylor,KD          | - | 5 [29,34,51,45,33]       | Newman,W      | - | 2[45,33]          |
| Bayless, TM        | - | 2 [21,45]                | Regueiro,M    | - | 5[29,34,51,45,33] |
| Cho, JH            | - | 7 [21,29,34,51,45,33,57] | Kornbluth,A   | - | 2[56,47]          |

\*Author's name= family name, abbreviations of first or first and second names.

1  
2  
3  
4  
5  
6  
7  
8  
9  
10  
11  
12  
13  
14  
15  
16  
17  
18  
19  
20  
21  
22  
23  
24  
25  
26  
27  
28  
29  
30  
31  
32  
33  
34  
35  
36  
37  
38  
39  
40  
41  
42  
43  
44  
45  
46  
47

**Table 5** Grading the top-cited articles in inflammatory bowel disease according to the Oxford Centre for Evidence-based Medicine – Levels of Evidence.

| Level | Domain                                          | Characteristics and description                                                       | Articles number [References]              |
|-------|-------------------------------------------------|---------------------------------------------------------------------------------------|-------------------------------------------|
| 1a    | Therapeutic/<br>Prevention,<br>Aetiology/Harm   | Systematic reviews of RCTs (with consistent results from individual studies)          | 1 (33)                                    |
|       | Prognosis                                       | Systematic reviews with homogeneity of inception cohort studies                       |                                           |
|       | Diagnosis                                       | Systematic reviews with homogeneity of Level 1 diagnostic studies                     |                                           |
|       | Differential diagnosis/symptom prevalence study | Systematic reviews with homogeneity of prospective cohort studies.                    |                                           |
| 1b    | Therapeutic/<br>Prevention,<br>Aetiology/Harm   | Individual RCT (with narrow confidence intervals)                                     | 12 [26,24,30,56,58,52,47,53,50,66,67, 59] |
|       | Prognosis                                       | Individual inception cohort study with >80% follow-up                                 |                                           |
|       | Diagnosis                                       | Validating cohort study with good reference standards                                 |                                           |
|       | Differential diagnosis/symptom prevalence study | Prospective cohort study with good follow-up                                          |                                           |
| 2a    | Therapeutic/<br>Prevention,<br>Aetiology/Harm   | Systematic review of cohort studies (with consistent results from individual studies) | 2 [34,63]                                 |

|    |                                                 |                                                                                                              |              |
|----|-------------------------------------------------|--------------------------------------------------------------------------------------------------------------|--------------|
|    |                                                 |                                                                                                              |              |
|    | Prognosis                                       | Systematic review with homogeneity of either retrospective cohort studies or untreated control groups in RCT |              |
|    | Diagnosis                                       | Systematic review with homogeneity of Level > 2 diagnostic studies                                           |              |
|    | Differential diagnosis/symptom prevalence study | Systematic review with homogeneity of 2b and better studies                                                  |              |
| 2b | Therapeutic/Prevention, Aetiology/Harm          | Individual cohort study (including low quality RCT; e.g., <80% follow-up)                                    | 3 [31,46,49] |
|    | Prognosis                                       | Retrospective cohort study or follow-up untreated control patients in an RCT                                 |              |
|    | Diagnosis                                       | Exploratory cohort study with good reference standards                                                       |              |
|    | Differential diagnosis/symptom prevalence study | Retrospective cohort study or poor follow-up                                                                 |              |
| 2c | Therapeutic/Prevention, Aetiology/Harm          | Outcome studies (analysis of large registries)                                                               | 3 [38,60,61] |
|    | Prognosis                                       | Outcomes research                                                                                            |              |
|    | Diagnosis                                       |                                                                                                              |              |
|    | Differential diagnosis/symptom                  | Ecological studies                                                                                           |              |



1  
2  
3  
4  
5  
6  
7  
8  
9  
10  
11  
12  
13  
14  
15  
16  
17  
18  
19  
20  
21  
22  
23  
24  
25  
26  
27  
28  
29  
30  
31  
32  
33  
34  
35  
36  
37  
38  
39  
40  
41  
42  
43  
44  
45  
46  
47

|    |                                                       |                                                                                                  |                                                   |
|----|-------------------------------------------------------|--------------------------------------------------------------------------------------------------|---------------------------------------------------|
|    | prevalence study                                      |                                                                                                  |                                                   |
| 3a | Therapeutic/<br>Prevention,<br>Aetiology/Harm         | Systemic reviews of case-control studies<br>(with consistent results from individual<br>studies) | 9 [25,27,36,35,41,43,55,45,57]                    |
|    | Prognosis                                             |                                                                                                  |                                                   |
|    | Diagnosis                                             | Systematic reviews with homogeneity<br>of 3b and better studies                                  |                                                   |
|    | Differential<br>diagnosis/symptom<br>prevalence study | Systematic reviews with homogeneity<br>of 3b and better studies                                  |                                                   |
| 3b | Therapeutic/<br>Prevention,<br>Aetiology/Harm         | Individual case-control study                                                                    | 15 [20,21,22,28,29,44,40,32,51,42,54,62,64,65,68] |
|    | Prognosis                                             |                                                                                                  |                                                   |
|    | Diagnosis                                             | Non consecutive study, or without<br>consistently applied reference<br>standards                 |                                                   |
|    | Differential<br>diagnosis/symptom<br>prevalence study | Non consecutive cohort study or very<br>limited population                                       |                                                   |
| 4  | Therapeutic/<br>Prevention,<br>Aetiology/Harm         | Case series (and poor quality cohort and<br>case-control studies)                                | 5 [23,39,37,48,69]                                |
|    | Prognosis                                             | Case-series (and poor quality prognostic<br>cohort studies)                                      |                                                   |
|    | Diagnosis                                             | Case-control study, poor or non-                                                                 |                                                   |

1  
2  
3  
4  
5  
6  
7  
8  
9  
10  
11  
12  
13  
14  
15  
16  
17  
18  
19  
20  
21  
22  
23  
24  
25  
26  
27  
28  
29  
30  
31  
32  
33  
34  
35  
36  
37  
38  
39  
40  
41  
42  
43  
44  
45  
46  
47

|   |                                                 |                                                                                               |       |
|---|-------------------------------------------------|-----------------------------------------------------------------------------------------------|-------|
|   |                                                 | independent reference standard                                                                |       |
|   | Differential diagnosis/symptom prevalence study | Case-series or superseded reference standards                                                 |       |
| 5 | Therapeutic/ Prevention, Aetiology/Harm         | Expert opinion without explicit critical appraisal or based on physiology, or bench research. | 0 [0] |
|   | Prognosis                                       | Expert opinion without explicit critical appraisal or based on physiology, or bench research. |       |
|   | Diagnosis                                       | Expert opinion without explicit critical appraisal or based on physiology, or bench research. |       |
|   | Differential diagnosis/symptom prevalence study | Expert opinion without explicit critical appraisal or based on physiology, or bench research. |       |

Peer review only

1  
2  
3  
4  
5  
6  
7  
8  
9  
10  
11  
12  
13  
14  
15  
16  
17  
18  
19  
20  
21  
22  
23  
24  
25  
26  
27  
28  
29  
30  
31  
32  
33  
34  
35  
36  
37  
38  
39  
40  
41  
42  
43  
44  
45  
46  
47

For peer review only

1  
2  
3  
4  
5  
6  
7  
8  
9  
10  
11  
12  
13  
14  
15  
16  
17  
18  
19  
20  
21  
22  
23  
24  
25  
26  
27  
28  
29  
30  
31  
32  
33  
34  
35  
36  
37  
38  
39  
40  
41  
42  
43  
44  
45  
46  
47  
48  
49  
50  
51  
52  
53  
54  
55  
56  
57  
58  
59  
60

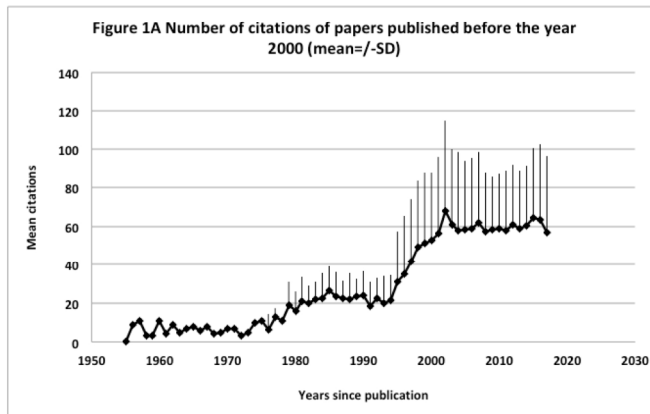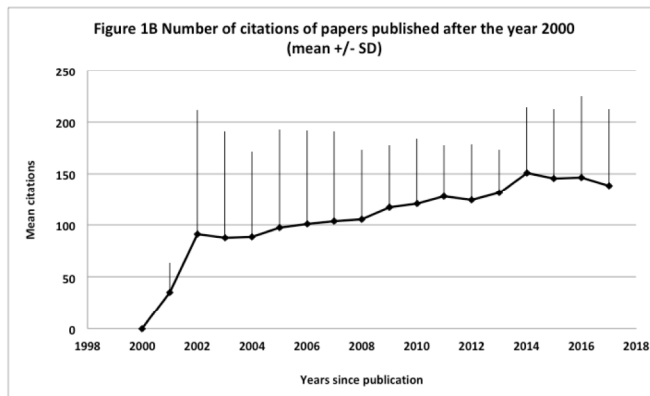

209x296mm (300 x 300 DPI)

## Appendix 1.

Top-cited articles on inflammatory bowel disease identified by searching the Web of Science database<sup>a</sup>

| Rank | Authors, Year [Reference]         | Article ( <i>Journal</i> )                                                                                            | 2016-JIF | Category          | Number of citations, Web of Knowledge | Average citation per year <sup>b</sup> | Rank of the article in the journal publishing it <sup>c</sup> | Origin: First author's organization, location (country)                                                                                     |
|------|-----------------------------------|-----------------------------------------------------------------------------------------------------------------------|----------|-------------------|---------------------------------------|----------------------------------------|---------------------------------------------------------------|---------------------------------------------------------------------------------------------------------------------------------------------|
| 1    | Hugot et al, 2001 <sup>20</sup>   | Association of NOD2 leucine-rich repeat variants with susceptibility to Crohn's disease. ( <i>NATURE</i> ).           | 40.137   | Basic research    | 3,555                                 | 209.1                                  | 134                                                           | Fondation Jean Dausset CEPH (France)                                                                                                        |
| 2    | Ogura et al, 2001 <sup>21</sup>   | A frameshift mutation in NOD2 associated with susceptibility to Crohn's disease. ( <i>NATURE</i> ).                   | 40.137   | Basic research    | 3,285                                 | 193.2                                  | 159                                                           | The University of Michigan Medical School, Michigan (United States).                                                                        |
| 3    | Kuhn et al, 1993 <sup>22</sup>    | Interleukin-10-deficient mice develop chronic enterocolitis. ( <i>CELL</i> )                                          | 30.410   | Basic research    | 2,982                                 | 119.3                                  | 67                                                            | Institute for Genetics, University of Cologne, (Germany)                                                                                    |
| 4    | Best et al, 1976 <sup>23</sup>    | Development of a Crohns-disease activity index-National cooperative Chrons-disease study ( <i>Gastroenterology</i> ). | 18.392   | Clinical research | 2,533                                 | 60.3                                   | 2                                                             | Hines Veterans Administration Cooperative Studies Support Center, University of Colorado Medical Center, Denver, Colorado, (United States). |
| 5    | Hanauer et al, 2002 <sup>24</sup> | Maintenance infliximab for Crohn's disease: the ACCENT I randomized trial ( <i>Lancet</i> )                           | 47.831   | Clinical research | 2,442                                 | 152.6                                  | 46                                                            | University of Chicago Medical Center, Chicago, IL (United States).                                                                          |
| 6    | Podolsky, 2002 <sup>25</sup>      | Inflammatory bowel disease. ( <i>New England Journal of Medicine</i> )                                                | 72.406   | Review            | 2,423                                 | 151.4                                  | 163                                                           | Massachusetts General Hospital and Harvard Medical School, Boston,                                                                          |

|    |                                         |                                                                                                                                                      |        |                   |       |       |     |                                                                                                       |
|----|-----------------------------------------|------------------------------------------------------------------------------------------------------------------------------------------------------|--------|-------------------|-------|-------|-----|-------------------------------------------------------------------------------------------------------|
|    |                                         |                                                                                                                                                      |        |                   |       |       |     | Massachusetts (United States).                                                                        |
| 7  | Targan et al, 1997 <sup>26</sup>        | A short-term study of chimeric monoclonal antibody cA2 to tumor necrosis factor alpha for Crohn's disease ( <i>New England Journal of Medicine</i> ) | 72.406 | Clinical research | 2,364 | 112.6 | 169 | Cedars-Sinai Medical Center, Los Angeles, California (United States)                                  |
| 8  | Xavier and Podolsky, 2007 <sup>27</sup> | Unravelling the pathogenesis of inflammatory bowel disease ( <i>NATURE</i> )                                                                         | 40.137 | Review            | 2,036 | 185.1 | 450 | Massachusetts General Hospital, Harvard Medical School, Boston, Massachusetts (United States).        |
| 9  | Truelove and Witts, 1955 <sup>28</sup>  | Cortisone in ulcerative colitis- Final report on a therapeutic trial ( <i>British Medical Journal</i> ).                                             | 20.785 | Clinical research | 1,871 | 29.7  | 20  | Nuffield Department of Clinical Medicine, Oxford (United Kingdom)                                     |
| 10 | Duerr et al, 2006 <sup>29</sup>         | A genome-wide association study identifies IL23R as an inflammatory bowel disease gene. ( <i>SCIENCE</i> ).                                          | 37.205 | Clinical research | 1,862 | 155.2 | 530 | Department of Medicine, School of Medicine, University of Pittsburgh, Pittsburgh, PA (United States). |
| 12 | Rutgeerts et al, 2005 <sup>30</sup>     | Infliximab for induction and maintenance therapy for ulcerative colitis ( <i>New England Journal of Medicine</i> )                                   | 72.406 | Clinical research | 1,834 | 141.1 | 290 | University Hospital Gasthuisberg, Leuven, (Belgium).                                                  |
| 12 | Present et al, 1999 <sup>31</sup>       | Infliximab for treatment of fistulas in patients with Crohn's disease ( <i>New England Journal of Medicine</i> )                                     | 72.406 | Clinical research | 1,730 | 91.0  | 321 | Mount Sinai Medical Center, New York, NY, (United States)                                             |

|    |                                         |                                                                                                                                                                                                            |        |                      |       |       |     |                                                                                                            |
|----|-----------------------------------------|------------------------------------------------------------------------------------------------------------------------------------------------------------------------------------------------------------|--------|----------------------|-------|-------|-----|------------------------------------------------------------------------------------------------------------|
| 13 | Frank et al, 2007 <sup>32</sup>         | Molecular-phylogenetic characterization of microbial community imbalances in human inflammatory bowel diseases. ( <i>Proceedings of the National Academy of Sciences of the United States of America</i> ) | 9.661  | Basic research       | 1,650 | 150.0 | 172 | University of Colorado, Boulder, CO (United States)                                                        |
| 14 | Jostins et al, 2012 <sup>33</sup>       | Host-microbe interactions have shaped the genetic architecture of inflammatory bowel disease. ( <i>Nature</i> )                                                                                            | 40.137 | Review Meta-analysis | 1,643 | 273.8 | 683 | Wellcome Trust Sanger Institute, Wellcome Trust Genome Campus, Hinxton, Cambridge, (United Kingdom)        |
| 15 | Barrett et al, 2008 <sup>34</sup>       | Genome-wide association defines more than 30 distinct susceptibility loci for Crohn's disease. ( <i>Nature Genetics</i> )                                                                                  | 27.959 | Review Meta-analysis | 1,631 | 163.1 | 25  | Wellcome Trust Centre for Human Genetics, University of Oxford, Roosevelt Drive, Oxford (United Kingdom)   |
| 16 | Loftus, 2004 <sup>35</sup>              | Clinical epidemiology of inflammatory bowel disease: Incidence, prevalence, and environmental influences ( <i>Gastroenterology</i> )                                                                       | 18.392 | Review               | 1,566 | 111.9 | 10  | Mayo Clinic, Rochester, Minnesota, (United States)                                                         |
| 17 | Fiocchi, 1998 <sup>36</sup>             | Inflammatory bowel disease: Etiology and pathogenesis ( <i>Gastroenterology</i> )                                                                                                                          | 18.392 | Review               | 1,540 | 77.0  | 12  | University Hospitals of Cleveland Case Western Reserve University School of Medicine, Ohio (United States) |
| 18 | Harvey and Bradshaw, 1980 <sup>37</sup> | A simple index of Crohns-disease activity ( <i>Lancet</i> )                                                                                                                                                | 47.831 | Clinical research    | 1,466 | 38.6  | 166 | Bristol Royal Infirmary and Frenchay Hospital, Bristol (United Kingdom)                                    |
| 19 | Molodeck                                | Increasing incidence and prevalence                                                                                                                                                                        | 18.392 | Review               | 1,438 | 239.7 | 19  | University of Calgary,                                                                                     |

|    |                                      |                                                                                                                                                                                                                                                          |        |                      |       |       |     |                                                                                                  |
|----|--------------------------------------|----------------------------------------------------------------------------------------------------------------------------------------------------------------------------------------------------------------------------------------------------------|--------|----------------------|-------|-------|-----|--------------------------------------------------------------------------------------------------|
|    | y et al, 2012 <sup>38</sup>          | of the inflammatory bowel diseases with time, based on systematic review. ( <i>Gastroenterology</i> ).                                                                                                                                                   |        |                      |       |       |     | Calgary, Alberta, (Canada).                                                                      |
| 20 | Riddell et al, 1983 <sup>39</sup>    | Dysplasia in inflammatory bowel disease- Standardized classification with provisional clinical applications ( <i>Human Pathology</i> )                                                                                                                   | 3.014  | Article              | 1,398 | 39.9  | 2   | National Foundation for Ileitis and Colitis, New York, (United States).                          |
| 21 | Okayasu et al, 1990 <sup>40</sup>    | A novel method in the induction of reliable experimental acute and chronic ulcerative-colitis in mice ( <i>Gastroenterology</i> )                                                                                                                        | 18.392 | Basic research       | 1,396 | 49.9  | 24  | School of Medicine, Tokyo Medical and Dental University, (Japan).                                |
| 22 | Eaden et al, 2001 <sup>41</sup>      | The risk of colorectal cancer in ulcerative colitis: a meta-analysis. ( <i>Gut</i> ).                                                                                                                                                                    | 16.658 | Review Meta-analysis | 1,388 | 81.6  | 1   | Leicester General Hospital, Gwendolen Road, Leicester (United Kingdom)                           |
| 23 | Sokol et al, 2008 <sup>42</sup>      | Faecalibacterium prausnitzii is an anti-inflammatory commensal bacterium identified by gut microbiota analysis of Crohn disease patients. <i>Proceedings of the National Academy of Sciences of the United States of America</i> )                       | 9.661  | Basic research       | 1,384 | 138.4 | 247 | Institut National de la Recherche Agronomique U910, Domaine de Vilvert, Jouy-en-Josas, (France). |
| 24 | Silverberg et al, 2005 <sup>43</sup> | Toward an integrated clinical, molecular and serological classification of inflammatory bowel disease: report of a Working Party of the 2005 Montreal World Congress of Gastroenterology. ( <i>Canadian Journal of Gastroenterology and Hepatology</i> ) | 2.147  | Report               | 1,373 | 105.6 | 1   | Mount Sinai Hospital IBD Centre, University of Toronto, Toronto, Ontario (Canada)                |



|    |                                    |                                                                                                                                    |        |                      |       |       |     |                                                                                                                                                         |
|----|------------------------------------|------------------------------------------------------------------------------------------------------------------------------------|--------|----------------------|-------|-------|-----|---------------------------------------------------------------------------------------------------------------------------------------------------------|
| 25 | Sadlack et al, 1993 <sup>44</sup>  | Ulcerative colitis-like disease in mice with a disrupted interleukin-2 gene ( <i>CELL</i> )                                        | 30.410 | Basic research       | 1,358 | 54.32 | 387 | Institute of Virology and Immunobiology, University of Würzburg, (Germany)                                                                              |
| 26 | Franke et al, 2010 <sup>45</sup>   | Genome-wide meta-analysis increases to 71 the number of confirmed Crohn's disease susceptibility loci. ( <i>Nature Genetics</i> )  | 27.959 | Review Meta-analysis | 1,321 | 165.1 | 63  | Institute of Clinical Molecular Biology, Christian-Albrechts-University Kiel, Kiel, (Germany).                                                          |
| 27 | Baert et al, 2003 <sup>46</sup>    | Influence of immunogenicity on the long-term efficacy of infliximab in Crohn's disease. ( <i>New England Journal of Medicine</i> ) | 72.406 | Clinical research    | 1,297 | 86.5  | 562 | University Hospital Gasthuisberg, Leuven, (Belgium).                                                                                                    |
| 28 | Colombel et al, 2010 <sup>47</sup> | Infliximab, azathioprine, or combination therapy for Crohn's disease ( <i>New England Journal of Medicine</i> )                    | 72.406 | Clinical research    | 1,294 | 161.7 | 565 | Hôpital Claude Huriez and Centre d'Investigation Clinique, Centre Hospitalier Universitaire de Lille, Université Lille Nord de France, Lille, (France). |
| 29 | Cooper et al, 1993 <sup>48</sup>   | Clinicopathologic study of dextran sulfate sodium experimental murine colitis. ( <i>Laboratory Investigation</i> )                 | 4.857  | Basic research       | 1,219 | 48.8  | 4   | Hahnemann University, Philadelphia, Pennsylvania. (United States)                                                                                       |
| 30 | Ekbom et al, 1990 <sup>49</sup>    | Ulcerative colitis and colorectal cancer. A population-based study. ( <i>New England Journal of Medicine</i> )                     | 72.406 | Clinical research    | 1,168 | 41.7  | 684 | University Hospital, Uppsala, (Sweden).                                                                                                                 |

|    |                                     |                                                                                                                                                                 |        |                   |       |       |     |                                                                                                                                   |
|----|-------------------------------------|-----------------------------------------------------------------------------------------------------------------------------------------------------------------|--------|-------------------|-------|-------|-----|-----------------------------------------------------------------------------------------------------------------------------------|
| 31 | Schroeder et al, 1987 <sup>50</sup> | Coated oral 5-aminosalicylic acid therapy for mildly to moderately active ulcerative colitis. A randomized study ( <i>New England Journal of Medicine</i> )     | 72.406 | Clinical research | 1,156 | 37.3  | 695 | Mayo Clinic, Rochester, MN (United States)                                                                                        |
| 32 | Rioux et al, 2007 <sup>51</sup>     | Genome-wide association study identifies new susceptibility loci for Crohn disease and implicates autophagy in disease pathogenesis. ( <i>Nature Genetics</i> ) | 27.959 | Basic research    | 1,152 | 104.7 | 89  | Université de Montréal and the Montreal Heart Institute, Research Center, Montreal, Quebec (Canada).                              |
| 33 | Sands et al, 2004 <sup>52</sup>     | Infliximab maintenance therapy for fistulizing Crohn's disease. ( <i>New England Journal of Medicine</i> )                                                      | 72.406 | Clinical research | 1,146 | 81.8  | 706 | Massachusetts General Hospital, and Harvard Medical School, Boston (United States)                                                |
| 34 | Colombel et al, 2007 <sup>53</sup>  | Adalimumab for maintenance of clinical response and remission in patients with Crohn's disease: the CHARM trial. ( <i>Gastroenterology</i> ).                   | 18.392 | Clinical research | 1,124 | 102.2 | 32  | Hôpital Claude Huriez, Centre Hospitalier Universitaire de Lille, Rue Michel Polonovski, Lille, (France)                          |
| 35 | Hampe et al, 2007 <sup>54</sup>     | A genome-wide association scan of nonsynonymous SNPs identifies a susceptibility variant for Crohn disease in ATG16L1. ( <i>Nature Genetics</i> )               | 27.959 | Basic research    | 1,123 | 102.1 | 92  | Institute for Clinical Molecular Biology, Christian-Albrechts University Kiel, University Hospital Schleswig-Holstein, (Germany). |

|    |                                       |                                                                                                                       |        |                   |       |       |     |                                                                                                                               |
|----|---------------------------------------|-----------------------------------------------------------------------------------------------------------------------|--------|-------------------|-------|-------|-----|-------------------------------------------------------------------------------------------------------------------------------|
| 36 | Bouma and Strober, 2003 <sup>55</sup> | The immunological and genetic basis of inflammatory bowel disease. ( <i>Nature Reviews Immunology</i> )               | 39.932 | Review            | 1,116 | 74.4  | 35  | National Institutes of Health, and National Institutes of Allergy and Infectious Diseases, Bethesda, Maryland (United States) |
| 37 | Lichtiger et al, 1994 <sup>56</sup>   | Cyclosporine in severe ulcerative colitis refractory to steroid therapy. ( <i>New England Journal of Medicine</i> )   | 72.406 | Clinical research | 1,104 | 46.0  | 755 | Mount Sinai School of Medicine, New York (United States).                                                                     |
| 38 | Abraham et al, 2009 <sup>57</sup>     | Inflammatory bowel disease. ( <i>New England Journal of Medicine</i> )                                                | 72.406 | Review            | 1,091 | 121.2 | 772 | Yale University School of Medicine, New Haven, CT (United States)                                                             |
| 39 | Summers et al, 1979 <sup>58</sup>     | National Cooperative Crohn's Disease Study: results of drug treatment ( <i>Gastroenterology</i> )                     | 18.392 | Clinical research | 1,059 | 27.1  | 37  | Division of gastroenterology, University of Iowa Medical Center, Iowa City, Virginia, (United States).                        |
| 40 | Satsangi, et al 2006 <sup>59</sup>    | The Montreal classification of inflammatory bowel disease: controversies, consensus, and implications ( <i>Gut</i> ). | 16.658 | Report            | 1,054 | 87.8  | 7   | Gstrointestinal Unit, Western General Hospital, University of Edinburg, (United Kingdom).                                     |
| 41 | Elson, et al, 1995 <sup>60</sup>      | Experimental models of inflammatory bowel disease. ( <i>Gastroenterology</i> ).                                       | 18.392 | Review            | 957   | 41.6  | 40  | Department of Medicine, University of Alabama Hospital at Birmingham, AL, (United States).                                    |

|    |                                      |                                                                                                                                                                                                                                                                                |        |                |     |      |    |                                                                                                                                                                     |
|----|--------------------------------------|--------------------------------------------------------------------------------------------------------------------------------------------------------------------------------------------------------------------------------------------------------------------------------|--------|----------------|-----|------|----|---------------------------------------------------------------------------------------------------------------------------------------------------------------------|
| 42 | Greenstein et al, 1976 <sup>61</sup> | The extra-intestinal complications of Crohn's disease and ulcerative colitis: a study of 700 patients. <i>Medicine (Baltimore)</i> .                                                                                                                                           | 1.804  | Review         | 945 | 22.5 | 10 | Department of Surgery, Mount Sinai School of Medicine and the City University of New York, New York, (United States.)                                               |
| 43 | Fujino et al, 2003 <sup>62</sup>     | Increased expression of interleukin 17 in inflammatory bowel disease. ( <i>Gut</i> ).                                                                                                                                                                                          | 16.658 | Basic research | 931 | 62.1 | 12 | Shiga University of Medical Science, Seta-Tukinowa, Otsu, (Japan).                                                                                                  |
| 44 | Sartor, 2008 <sup>63</sup>           | Microbial influences in inflammatory bowel diseases. ( <i>Gastroenterology</i> ).                                                                                                                                                                                              | 18.392 | Review         | 925 | 92.5 | 44 | Department of Medicine, Center for Gastrointestinal Biology and Disease, University of North Carolina at Chapel Hill, Chapel Hill, North Carolina, (United States). |
| 45 | Manichanh et al, 2006 <sup>64</sup>  | Reduced diversity of faecal microbiota in Crohn's disease revealed by a metagenomic approach. ( <i>Gut</i> ).                                                                                                                                                                  | 16.658 | Basic research | 913 | 76.1 | 13 | Unité d'Ecologie et de Physiologie du système Digestif, INRA-UEPSD, 78350 Jouy-en-Josas, (France)                                                                   |
| 46 | Fuss et al, 1996 <sup>65</sup>       | Disparate CD4+ lamina propria (LP) lymphokine secretion profiles in inflammatory bowel disease. Crohn's disease LP cells manifest increased secretion of IFN-gamma, whereas ulcerative colitis LP cells manifest increased secretion of IL-5. ( <i>Journal of Immunology</i> ) | 4.856  | Basic research | 893 | 40.6 | 68 | National Institute of Allergy and Infectious Diseases, National Institutes of Health, Bethesda, MD, (United States)                                                 |
| 47 | Rutgeerts                            | Predictability of the postoperative                                                                                                                                                                                                                                            | 18.392 | Clinical       | 884 | 31.6 | 50 | Department of Medicine,                                                                                                                                             |

1  
2  
3  
4  
5  
6  
7  
8  
9  
10  
11  
12  
13  
14  
15  
16  
17  
18  
19  
20  
21  
22  
23  
24  
25  
26  
27  
28  
29  
30  
31  
32  
33  
34  
35  
36  
37  
38  
39  
40  
41  
42  
43  
44  
45  
46

|    |                                        |                                                                                                                                             |        |                   |     |      |      |                                                                                                           |
|----|----------------------------------------|---------------------------------------------------------------------------------------------------------------------------------------------|--------|-------------------|-----|------|------|-----------------------------------------------------------------------------------------------------------|
|    | et al, 1990 <sup>66</sup>              | course of Crohn's disease. ( <i>Gastroenterology</i> ).                                                                                     |        | research          |     |      |      | University Hospital Gasthuisberg, University of Leuven, (Belgium).                                        |
| 48 | Present et al, 1980 <sup>67</sup>      | Treatment of Crohn's disease with 6-mercaptopurine. A long-term, randomized, double-blind study. ( <i>New England Journal of Medicine</i> ) | 72.406 | Clinical research | 874 | 23.0 | 1150 | Lenox Hill Hospital and the Mount Sinai School of Medicine of City University of New York (United States) |
| 49 | Swidsinski et al, 2002 <sup>68</sup>   | Mucosal flora in inflammatory bowel disease. ( <i>Gastroenterology</i> ).                                                                   | 18.392 | Basic research    | 873 | 54.6 | 52   | Charité Humboldt Universität, Berlin, (Germany).                                                          |
| 50 | Vandullem en et al, 1995 <sup>69</sup> | Treatment of Crohn's disease with anti-tumor necrosis factor chimeric monoclonal antibody (cA2). ( <i>Gastroenterology</i> ).               | 18.392 | Clinical research | 871 | 37.9 | 53   | Academic Medical Center, Amsterdam, (The Netherlands).                                                    |

<sup>a</sup> The search was conducted in April, 2018 by searching the Web of Knowledge.  
<sup>b</sup> The average citation per year = total number of citation / number of years since publication.  
<sup>c</sup> This ranking was identified by searching each journal for a top-cited article and identifying its ranking based on the number of citations received in comparison to the number of citations received by other articles published in that journal.

1  
2  
3  
4  
5  
6  
7  
8  
9  
10  
11  
12  
13  
14  
15  
16  
17  
18  
19  
20  
21  
22  
23  
24  
25  
26  
27  
28  
29  
30  
31  
32  
33  
34  
35  
36  
37  
38  
39  
40  
41  
42  
43  
44  
45  
46

For peer review only

## Appendix 2

### Glossary

**Articles** are scientific written composition representing a substantial advance in the understanding of a topic or problem. They raise questions, provide thoughtful, critical analysis and aim at establishing new directions.

**Basic research** is defined as fundamental research, which aims at improving scientific theories and our understanding of a phenomenon. Basic research may use animal models and include in vivo and in-vitro studies that target advances of fundamental knowledge.

**Clinical research** is defined as research applied to a clinical condition/disease with the aim to test an intervention or make a change to a phenomenon. Basic research usually fuels clinical research.

**Reports** are defined as brief articles with conclusions, results, and recommendations. They report on a substantial advance in an area/topic or a problem and aim at reporting findings and standardization of practice.

**Review and meta-analysis** are defined as an article reviewing the progress of knowledge in a particular topic, critically analysing the current status of knowledge and presenting an understanding of the subject by discussing related literature. A review should identify gaps in the literature and highlight future directions for further research. **A meta-analysis** is defined as a statistical analysis that combines the results from different scientific studies to provide conclusive evidence.
