# Supplementary material for: What can we learn from top-cited articles in inflammatory bowel disease? A bibliometric analysis and assessment of the level of evidence
Source: PubMed Central journal article supplement — BMJ Open. 2018 Jul 12;8(7):e021233. doi: 10.1136/bmjopen-2017-021233 (PMC6082456; doi:10.1136/bmjopen-2017-021233), 2018-07-12
Supplement: bmjopen-2017-021233supp001.pdf [file bmjopen-2017-021233supp001.pdf]

Appendix 1.

Top-cited articles on inflammatory bowel disease identified by searching the Web of Science database<sup>a</sup>

| Rank | Authors, Year [Reference]         | Article ( <i>Journal</i> )                                                                                            | 2016-JIF | Category          | Number of citations, Web of Knowledge | Average citation per year <sup>b</sup> | Rank of the article in the journal publishing it <sup>c</sup> | Origin: First author's organization, location (country)                                                                                     |
|------|-----------------------------------|-----------------------------------------------------------------------------------------------------------------------|----------|-------------------|---------------------------------------|----------------------------------------|---------------------------------------------------------------|---------------------------------------------------------------------------------------------------------------------------------------------|
| 1    | Hugot et al, 2001 <sup>20</sup>   | Association of NOD2 leucine-rich repeat variants with susceptibility to Crohn's disease. ( <i>NATURE</i> ).           | 40.137   | Basic research    | 3,555                                 | 209.1                                  | 134                                                           | Fondation Jean Dausset CEPH (France)                                                                                                        |
| 2    | Ogura et al, 2001 <sup>21</sup>   | A frameshift mutation in NOD2 associated with susceptibility to Crohn's disease. ( <i>NATURE</i> ).                   | 40.137   | Basic research    | 3,285                                 | 193.2                                  | 159                                                           | The University of Michigan Medical School, Michigan (United States).                                                                        |
| 3    | Kuhn et al, 1993 <sup>22</sup>    | Interleukin-10-deficient mice develop chronic enterocolitis. ( <i>CELL</i> )                                          | 30.410   | Basic research    | 2,982                                 | 119.3                                  | 67                                                            | Institute for Genetics, University of Cologne, (Germany)                                                                                    |
| 4    | Best et al, 1976 <sup>23</sup>    | Development of a Crohns-disease activity index-National cooperative Chrons-disease study ( <i>Gastroenterology</i> ). | 18.392   | Clinical research | 2,533                                 | 60.3                                   | 2                                                             | Hines Veterans Administration Cooperative Studies Support Center, University of Colorado Medical Center, Denver, Colorado, (United States). |
| 5    | Hanauer et al, 2002 <sup>24</sup> | Maintenance infliximab for Crohn's disease: the ACCENT I randomized trial ( <i>Lancet</i> )                           | 47.831   | Clinical research | 2,442                                 | 152.6                                  | 46                                                            | University of Chicago Medical Center, Chicago, IL (United States).                                                                          |
| 6    | Podolsky, 2002 <sup>25</sup>      | Inflammatory bowel disease. ( <i>New England Journal of Medicine</i> )                                                | 72.406   | Review            | 2,423                                 | 151.4                                  | 163                                                           | Massachusetts General Hospital and Harvard Medical School, Boston,                                                                          |

|    |                                         |                                                                                                                                                      |        |                   |       |       |     |                                                                                                       |
|----|-----------------------------------------|------------------------------------------------------------------------------------------------------------------------------------------------------|--------|-------------------|-------|-------|-----|-------------------------------------------------------------------------------------------------------|
|    |                                         |                                                                                                                                                      |        |                   |       |       |     | Massachusetts (United States).                                                                        |
| 7  | Targan et al, 1997 <sup>26</sup>        | A short-term study of chimeric monoclonal antibody cA2 to tumor necrosis factor alpha for Crohn's disease ( <i>New England Journal of Medicine</i> ) | 72.406 | Clinical research | 2,364 | 112.6 | 169 | Cedars-Sinai Medical Center, Los Angeles, California (United States)                                  |
| 8  | Xavier and Podolsky, 2007 <sup>27</sup> | Unravelling the pathogenesis of inflammatory bowel disease ( <i>NATURE</i> )                                                                         | 40.137 | Review            | 2,036 | 185.1 | 450 | Massachusetts General Hospital, Harvard Medical School, Boston, Massachusetts (United States).        |
| 9  | Truelove and Witts, 1955 <sup>28</sup>  | Cortisone in ulcerative colitis- Final report on a therapeutic trial ( <i>British Medical Journal</i> ).                                             | 20.785 | Clinical research | 1,871 | 29.7  | 20  | Nuffield Department of Clinical Medicine, Oxford (United Kingdom)                                     |
| 10 | Duerr et al, 2006 <sup>29</sup>         | A genome-wide association study identifies IL23R as an inflammatory bowel disease gene. ( <i>SCIENCE</i> ).                                          | 37.205 | Clinical research | 1,862 | 155.2 | 530 | Department of Medicine, School of Medicine, University of Pittsburgh, Pittsburgh, PA (United States). |
| 12 | Rutgeerts et al, 2005 <sup>30</sup>     | Infliximab for induction and maintenance therapy for ulcerative colitis ( <i>New England Journal of Medicine</i> )                                   | 72.406 | Clinical research | 1,834 | 141.1 | 290 | University Hospital Gasthuisberg, Leuven, (Belgium).                                                  |
| 12 | Present et al, 1999 <sup>31</sup>       | Infliximab for treatment of fistulas in patients with Crohn's disease ( <i>New England Journal of Medicine</i> )                                     | 72.406 | Clinical research | 1,730 | 91.0  | 321 | Mount Sinai Medical Center, New York, NY, (United States)                                             |

|    |                                         |                                                                                                                                                                                                            |        |                      |       |       |     |                                                                                                            |
|----|-----------------------------------------|------------------------------------------------------------------------------------------------------------------------------------------------------------------------------------------------------------|--------|----------------------|-------|-------|-----|------------------------------------------------------------------------------------------------------------|
| 13 | Frank et al, 2007 <sup>32</sup>         | Molecular-phylogenetic characterization of microbial community imbalances in human inflammatory bowel diseases. ( <i>Proceedings of the National Academy of Sciences of the United States of America</i> ) | 9.661  | Basic research       | 1,650 | 150.0 | 172 | University of Colorado, Boulder, CO (United States)                                                        |
| 14 | Jostins et al, 2012 <sup>33</sup>       | Host-microbe interactions have shaped the genetic architecture of inflammatory bowel disease. ( <i>Nature</i> )                                                                                            | 40.137 | Review Meta-analysis | 1,643 | 273.8 | 683 | Wellcome Trust Sanger Institute, Wellcome Trust Genome Campus, Hinxton, Cambridge, (United Kingdom)        |
| 15 | Barrett et al, 2008 <sup>34</sup>       | Genome-wide association defines more than 30 distinct susceptibility loci for Crohn's disease. ( <i>Nature Genetics</i> )                                                                                  | 27.959 | Review Meta-analysis | 1,631 | 163.1 | 25  | Wellcome Trust Centre for Human Genetics, University of Oxford, Roosevelt Drive, Oxford (United Kingdom)   |
| 16 | Loftus, 2004 <sup>35</sup>              | Clinical epidemiology of inflammatory bowel disease: Incidence, prevalence, and environmental influences ( <i>Gastroenterology</i> )                                                                       | 18.392 | Review               | 1,566 | 111.9 | 10  | Mayo Clinic, Rochester, Minnesota, (United States)                                                         |
| 17 | Fiocchi, 1998 <sup>36</sup>             | Inflammatory bowel disease: Etiology and pathogenesis ( <i>Gastroenterology</i> )                                                                                                                          | 18.392 | Review               | 1,540 | 77.0  | 12  | University Hospitals of Cleveland Case Western Reserve University School of Medicine, Ohio (United States) |
| 18 | Harvey and Bradshaw, 1980 <sup>37</sup> | A simple index of Crohns-disease activity ( <i>Lancet</i> )                                                                                                                                                | 47.831 | Clinical research    | 1,466 | 38.6  | 166 | Bristol Royal Infirmary and Frenchay Hospital, Bristol (United Kingdom)                                    |
| 19 | Molodeck                                | Increasing incidence and prevalence                                                                                                                                                                        | 18.392 | Review               | 1,438 | 239.7 | 19  | University of Calgary,                                                                                     |

|    |                                      |                                                                                                                                                                                                                                                          |        |                      |       |       |     |                                                                                                  |
|----|--------------------------------------|----------------------------------------------------------------------------------------------------------------------------------------------------------------------------------------------------------------------------------------------------------|--------|----------------------|-------|-------|-----|--------------------------------------------------------------------------------------------------|
|    | y et al, 2012 <sup>38</sup>          | of the inflammatory bowel diseases with time, based on systematic review. ( <i>Gastroenterology</i> ).                                                                                                                                                   |        |                      |       |       |     | Calgary, Alberta, (Canada).                                                                      |
| 20 | Riddell et al, 1983 <sup>39</sup>    | Dysplasia in inflammatory bowel disease- Standardized classification with provisional clinical applications ( <i>Human Pathology</i> )                                                                                                                   | 3.014  | Article              | 1,398 | 39.9  | 2   | National Foundation for Ileitis and Colitis, New York, (United States).                          |
| 21 | Okayasu et al, 1990 <sup>40</sup>    | A novel method in the induction of reliable experimental acute and chronic ulcerative-colitis in mice ( <i>Gastroenterology</i> )                                                                                                                        | 18.392 | Basic research       | 1,396 | 49.9  | 24  | School of Medicine, Tokyo Medical and Dental University, (Japan).                                |
| 22 | Eaden et al, 2001 <sup>41</sup>      | The risk of colorectal cancer in ulcerative colitis: a meta-analysis. ( <i>Gut</i> ).                                                                                                                                                                    | 16.658 | Review Meta-analysis | 1,388 | 81.6  | 1   | Leicester General Hospital, Gwendolen Road, Leicester (United Kingdom)                           |
| 23 | Sokol et al, 2008 <sup>42</sup>      | Faecalibacterium prausnitzii is an anti-inflammatory commensal bacterium identified by gut microbiota analysis of Crohn disease patients. <i>Proceedings of the National Academy of Sciences of the United States of America</i> )                       | 9.661  | Basic research       | 1,384 | 138.4 | 247 | Institut National de la Recherche Agronomique U910, Domaine de Vilvert, Jouy-en-Josas, (France). |
| 24 | Silverberg et al, 2005 <sup>43</sup> | Toward an integrated clinical, molecular and serological classification of inflammatory bowel disease: report of a Working Party of the 2005 Montreal World Congress of Gastroenterology. ( <i>Canadian Journal of Gastroenterology and Hepatology</i> ) | 2.147  | Report               | 1,373 | 105.6 | 1   | Mount Sinai Hospital IBD Centre, University of Toronto, Toronto, Ontario (Canada)                |

|    |                                    |                                                                                                                                    |        |                      |       |       |     |                                                                                                                                                         |
|----|------------------------------------|------------------------------------------------------------------------------------------------------------------------------------|--------|----------------------|-------|-------|-----|---------------------------------------------------------------------------------------------------------------------------------------------------------|
| 25 | Sadlack et al, 1993 <sup>44</sup>  | Ulcerative colitis-like disease in mice with a disrupted interleukin-2 gene ( <i>CELL</i> )                                        | 30.410 | Basic research       | 1,358 | 54.32 | 387 | Institute of Virology and Immunobiology, University of Würzburg, (Germany)                                                                              |
| 26 | Franke et al, 2010 <sup>45</sup>   | Genome-wide meta-analysis increases to 71 the number of confirmed Crohn's disease susceptibility loci. ( <i>Nature Genetics</i> )  | 27.959 | Review Meta-analysis | 1,321 | 165.1 | 63  | Institute of Clinical Molecular Biology, Christian-Albrechts-University Kiel, Kiel, (Germany).                                                          |
| 27 | Baert et al, 2003 <sup>46</sup>    | Influence of immunogenicity on the long-term efficacy of infliximab in Crohn's disease. ( <i>New England Journal of Medicine</i> ) | 72.406 | Clinical research    | 1,297 | 86.5  | 562 | University Hospital Gasthuisberg, Leuven, (Belgium).                                                                                                    |
| 28 | Colombel et al, 2010 <sup>47</sup> | Infliximab, azathioprine, or combination therapy for Crohn's disease ( <i>New England Journal of Medicine</i> )                    | 72.406 | Clinical research    | 1,294 | 161.7 | 565 | Hôpital Claude Huriez and Centre d'Investigation Clinique, Centre Hospitalier Universitaire de Lille, Université Lille Nord de France, Lille, (France). |
| 29 | Cooper et al, 1993 <sup>48</sup>   | Clinicopathologic study of dextran sulfate sodium experimental murine colitis. ( <i>Laboratory Investigation</i> )                 | 4.857  | Basic research       | 1,219 | 48.8  | 4   | Hahnemann University, Philadelphia, Pennsylvania. (United States)                                                                                       |
| 30 | Ekbom et al, 1990 <sup>49</sup>    | Ulcerative colitis and colorectal cancer. A population-based study. ( <i>New England Journal of Medicine</i> )                     | 72.406 | Clinical research    | 1,168 | 41.7  | 684 | University Hospital, Uppsala, (Sweden).                                                                                                                 |

|    |                                     |                                                                                                                                                                 |        |                   |       |       |     |                                                                                                                                   |
|----|-------------------------------------|-----------------------------------------------------------------------------------------------------------------------------------------------------------------|--------|-------------------|-------|-------|-----|-----------------------------------------------------------------------------------------------------------------------------------|
| 31 | Schroeder et al, 1987 <sup>50</sup> | Coated oral 5-aminosalicylic acid therapy for mildly to moderately active ulcerative colitis. A randomized study ( <i>New England Journal of Medicine</i> )     | 72.406 | Clinical research | 1,156 | 37.3  | 695 | Mayo Clinic, Rochester, MN (United States)                                                                                        |
| 32 | Rioux et al, 2007 <sup>51</sup>     | Genome-wide association study identifies new susceptibility loci for Crohn disease and implicates autophagy in disease pathogenesis. ( <i>Nature Genetics</i> ) | 27.959 | Basic research    | 1,152 | 104.7 | 89  | Université de Montréal and the Montreal Heart Institute, Research Center, Montreal, Quebec (Canada).                              |
| 33 | Sands et al, 2004 <sup>52</sup>     | Infliximab maintenance therapy for fistulizing Crohn's disease. ( <i>New England Journal of Medicine</i> )                                                      | 72.406 | Clinical research | 1,146 | 81.8  | 706 | Massachusetts General Hospital, and Harvard Medical School, Boston (United States)                                                |
| 34 | Colombel et al, 2007 <sup>53</sup>  | Adalimumab for maintenance of clinical response and remission in patients with Crohn's disease: the CHARM trial. ( <i>Gastroenterology</i> ).                   | 18.392 | Clinical research | 1,124 | 102.2 | 32  | Hôpital Claude Huriez, Centre Hospitalier Universitaire de Lille, Rue Michel Polonovski, Lille, (France)                          |
| 35 | Hampe et al, 2007 <sup>54</sup>     | A genome-wide association scan of nonsynonymous SNPs identifies a susceptibility variant for Crohn disease in ATG16L1. ( <i>Nature Genetics</i> )               | 27.959 | Basic research    | 1,123 | 102.1 | 92  | Institute for Clinical Molecular Biology, Christian-Albrechts University Kiel, University Hospital Schleswig-Holstein, (Germany). |

|    |                                       |                                                                                                                       |        |                   |       |       |     |                                                                                                                               |
|----|---------------------------------------|-----------------------------------------------------------------------------------------------------------------------|--------|-------------------|-------|-------|-----|-------------------------------------------------------------------------------------------------------------------------------|
| 36 | Bouma and Strober, 2003 <sup>55</sup> | The immunological and genetic basis of inflammatory bowel disease. ( <i>Nature Reviews Immunology</i> )               | 39.932 | Review            | 1,116 | 74.4  | 35  | National Institutes of Health, and National Institutes of Allergy and Infectious Diseases, Bethesda, Maryland (United States) |
| 37 | Lichtiger et al, 1994 <sup>56</sup>   | Cyclosporine in severe ulcerative colitis refractory to steroid therapy. ( <i>New England Journal of Medicine</i> )   | 72.406 | Clinical research | 1,104 | 46.0  | 755 | Mount Sinai School of Medicine, New York (United States).                                                                     |
| 38 | Abraham et al, 2009 <sup>57</sup>     | Inflammatory bowel disease. ( <i>New England Journal of Medicine</i> )                                                | 72.406 | Review            | 1,091 | 121.2 | 772 | Yale University School of Medicine, New Haven, CT (United States)                                                             |
| 39 | Summers et al, 1979 <sup>58</sup>     | National Cooperative Crohn's Disease Study: results of drug treatment ( <i>Gastroenterology</i> )                     | 18.392 | Clinical research | 1,059 | 27.1  | 37  | Division of gastroenterology, University of Iowa Medical Center, Iowa City, Virginia, (United States).                        |
| 40 | Satsangi, et al 2006 <sup>59</sup>    | The Montreal classification of inflammatory bowel disease: controversies, consensus, and implications ( <i>Gut</i> ). | 16.658 | Report            | 1,054 | 87.8  | 7   | Gstrointestinal Unit, Western General Hospital, University of Edinburg, (United Kingdom).                                     |
| 41 | Elson, et al, 1995 <sup>60</sup>      | Experimental models of inflammatory bowel disease. ( <i>Gastroenterology</i> ).                                       | 18.392 | Review            | 957   | 41.6  | 40  | Department of Medicine, University of Alabama Hospital at Birmingham, AL, (United States).                                    |

|    |                                      |                                                                                                                                                                                                                                                                                |        |                |     |      |    |                                                                                                                                                                     |
|----|--------------------------------------|--------------------------------------------------------------------------------------------------------------------------------------------------------------------------------------------------------------------------------------------------------------------------------|--------|----------------|-----|------|----|---------------------------------------------------------------------------------------------------------------------------------------------------------------------|
| 42 | Greenstein et al, 1976 <sup>61</sup> | The extra-intestinal complications of Crohn's disease and ulcerative colitis: a study of 700 patients. <i>Medicine (Baltimore)</i> .                                                                                                                                           | 1.804  | Review         | 945 | 22.5 | 10 | Department of Surgery, Mount Sinai School of Medicine and the City University of New York, New York, (United States.)                                               |
| 43 | Fujino et al, 2003 <sup>62</sup>     | Increased expression of interleukin 17 in inflammatory bowel disease. ( <i>Gut</i> ).                                                                                                                                                                                          | 16.658 | Basic research | 931 | 62.1 | 12 | Shiga University of Medical Science, Seta-Tukinowa, Otsu, (Japan).                                                                                                  |
| 44 | Sartor, 2008 <sup>63</sup>           | Microbial influences in inflammatory bowel diseases. ( <i>Gastroenterology</i> ).                                                                                                                                                                                              | 18.392 | Review         | 925 | 92.5 | 44 | Department of Medicine, Center for Gastrointestinal Biology and Disease, University of North Carolina at Chapel Hill, Chapel Hill, North Carolina, (United States). |
| 45 | Manichanh et al, 2006 <sup>64</sup>  | Reduced diversity of faecal microbiota in Crohn's disease revealed by a metagenomic approach. ( <i>Gut</i> ).                                                                                                                                                                  | 16.658 | Basic research | 913 | 76.1 | 13 | Unité d'Ecologie et de Physiologie du système Digestif, INRA-UEPSD, 78350 Jouy-en-Josas, (France)                                                                   |
| 46 | Fuss et al, 1996 <sup>65</sup>       | Disparate CD4+ lamina propria (LP) lymphokine secretion profiles in inflammatory bowel disease. Crohn's disease LP cells manifest increased secretion of IFN-gamma, whereas ulcerative colitis LP cells manifest increased secretion of IL-5. ( <i>Journal of Immunology</i> ) | 4.856  | Basic research | 893 | 40.6 | 68 | National Institute of Allergy and Infectious Diseases, National Institutes of Health, Bethesda, MD, (United States)                                                 |
| 47 | Rutgeerts                            | Predictability of the postoperative                                                                                                                                                                                                                                            | 18.392 | Clinical       | 884 | 31.6 | 50 | Department of Medicine,                                                                                                                                             |



|    |                                        |                                                                                                                                             |        |                   |     |      |      |                                                                                                           |
|----|----------------------------------------|---------------------------------------------------------------------------------------------------------------------------------------------|--------|-------------------|-----|------|------|-----------------------------------------------------------------------------------------------------------|
|    | et al, 1990 <sup>66</sup>              | course of Crohn's disease. ( <i>Gastroenterology</i> ).                                                                                     |        | research          |     |      |      | University Hospital Gasthuisberg, University of Leuven, (Belgium).                                        |
| 48 | Present et al, 1980 <sup>67</sup>      | Treatment of Crohn's disease with 6-mercaptopurine. A long-term, randomized, double-blind study. ( <i>New England Journal of Medicine</i> ) | 72.406 | Clinical research | 874 | 23.0 | 1150 | Lenox Hill Hospital and the Mount Sinai School of Medicine of City University of New York (United States) |
| 49 | Swidsinski et al, 2002 <sup>68</sup>   | Mucosal flora in inflammatory bowel disease. ( <i>Gastroenterology</i> ).                                                                   | 18.392 | Basic research    | 873 | 54.6 | 52   | Charité Humboldt Universität, Berlin, (Germany).                                                          |
| 50 | Vandullem en et al, 1995 <sup>69</sup> | Treatment of Crohn's disease with anti-tumor necrosis factor chimeric monoclonal antibody (cA2). ( <i>Gastroenterology</i> ).               | 18.392 | Clinical research | 871 | 37.9 | 53   | Academic Medical Center, Amsterdam, (The Netherlands).                                                    |

<sup>a</sup> The search was conducted in April, 2018 by searching the Web of Knowledge.

<sup>b</sup> The average citation per year = total number of citation / number of years since publication.

<sup>c</sup> This ranking was identified by searching each journal for a top-cited article and identifying its ranking based on the number of citations received in comparison to the number of citations received by other articles published in that journal.
