# Supplementary material for: What can we learn from top-cited articles in inflammatory bowel disease? A bibliometric analysis and assessment of the level of evidence
Source: PubMed Central journal article supplement — BMJ Open. 2018 Jul 12;8(7):e021233. doi: 10.1136/bmjopen-2017-021233 (PMC6082456; doi:10.1136/bmjopen-2017-021233), 2018-07-12
Supplement: bmjopen-2017-021233supp002.pdf [file bmjopen-2017-021233supp002.pdf]

## Appendix 2

### Glossary

**Articles** are scientific written composition representing a substantial advance in the understanding of a topic or problem. They raise questions, provide thoughtful, critical analysis and aim at establishing new directions.

**Basic research** is defined as fundamental research, which aims at improving scientific theories and our understanding of a phenomenon. Basic research may use animal models and include in vivo and in-vitro studies that target advances of fundamental knowledge.

**Clinical research** is defined as research applied to a clinical condition/disease with the aim to test an intervention or make a change to a phenomenon. Basic research usually fuels clinical research.

**Reports** are defined as brief articles with conclusions, results, and recommendations. They report on a substantial advance in an area/topic or a problem and aim at reporting findings and standardization of practice.

**Review and meta-analysis** are defined as an article reviewing the progress of knowledge in a particular topic, critically analysing the current status of knowledge and presenting an understanding of the subject by discussing related literature. A review should identify gaps in the literature and highlight future directions for further research. **A meta-analysis** is defined as a statistical analysis that combines the results from different scientific studies to provide conclusive evidence.
